# Supplementary material for: Cardioprotective Signature of Short-Term Caloric Restriction
Source: PLoS One. 2015 Jun 22;10(6):e0130658. doi: 10.1371/journal.pone.0130658 (PMC4476723; doi:10.1371/journal.pone.0130658)
Supplement: S1 File — Table A provides a detailed list of primary and secondary antibodies used for this study. Table B contains primer sequences used for real time RT-PCR. Table C (included as a separate excel file) lists up- and down-regulated genes in CR vs. AL. Further details regarding the animal experimentation employed in this study are provided through the Animal Research: Reporting In Vivo Experiments (ARRIVE) guidelines checklist. (ZIP) [file pone.0130658.s001.zip]

Archive with 3 entries (3 files):
- NC3Rs_ARRIVE_Guidelines_Checklist-Noyan_et_al._PLOS_One.pdf
- S1_File-Noyan_et_al. FINAL2.docx
- Table_C_in_S1_File.xls
