# Supplementary material for: Cardioprotective Signature of Short-Term Caloric Restriction
Source: PLoS One. 2015 Jun 22;10(6):e0130658. doi: 10.1371/journal.pone.0130658 (PMC4476723; doi:10.1371/journal.pone.0130658)
Supplement: S1 File — Table A provides a detailed list of primary and secondary antibodies used for this study. Table B contains primer sequences used for real time RT-PCR. Table C (included as a separate excel file) lists up- and down-regulated genes in CR vs. AL. Further details regarding the animal experimentation employed in this study are provided through the Animal Research: Reporting In Vivo Experiments (ARRIVE) guidelines checklist. (ZIP) [file pone.0130658.s001.zip › Table_C_in_S1_File.xls]

## Sheet: FC1.2 in CR vs AL
Cardioprotective signature of short-term caloric restriction
Noyan et al.
Microarray data: List of Up- and Down-regulated genes.
Probe Set ID	Fold change([CR] vs [AL])	Regulation	Gene Symbol	Entrez Gene	Gene Ontology Biological Process	Gene Ontology Cellular Component	Gene Ontology Molecular Function	Gene Title
1434202_a_at	5.01971	up	Fam107a	268709	0001558 // regulation of cell growth // inferred from electronic annotation	0005634 // nucleus // inferred from electronic annotation	0005515 // protein binding // inferred from electronic annotation	family with sequence similarity 107, member A
1448553_at	4.70387	up	Myh7	140781	0000302 // response to reactive oxygen species // inferred from electronic annotation /// 0006200 // ATP catabolic process // inferred from electronic annotation /// 0006941 // striated muscle contraction // inferred from electronic annotation	0005737 // cytoplasm // inferred from electronic annotation /// 0005863 // striated muscle thick filament // inferred from electronic annotation /// 0016459 // myosin complex // inferred from direct assay /// 0016459 // myosin complex // inferred from electronic annotation /// 0030016 // myofibril // inferred from direct assay	0000146 // microfilament motor activity // inferred from electronic annotation /// 0000166 // nucleotide binding // inferred from electronic annotation /// 0003774 // motor activity // inferred from electronic annotation /// 0003779 // actin binding // inferred from electronic annotation /// 0005515 // protein binding // inferred from electronic annotation /// 0005516 // calmodulin binding // inf…	myosin, heavy polypeptide 7, cardiac muscle, beta
1438211_s_at	4.68444	up	Dbp	13170	0006350 // transcription // inferred from electronic annotation /// 0006355 // regulation of transcription, DNA-dependent // traceable author statement /// 0006355 // regulation of transcription, DNA-dependent // inferred from electronic annotation /// 0007623 // circadian rhythm // traceable author statement /// 0042127 // regulation of cell proliferation // inferred from electronic annotation /…	0005634 // nucleus // inferred from electronic annotation	0003677 // DNA binding // inferred from electronic annotation /// 0003700 // transcription factor activity // inferred from electronic annotation /// 0043565 // sequence-specific DNA binding // inferred from electronic annotation /// 0046983 // protein dimerization activity // inferred from electronic annotation	D site albumin promoter binding protein
1417602_at	4.50299	up	Per2	18627	0006350 // transcription // inferred from electronic annotation /// 0006355 // regulation of transcription, DNA-dependent // inferred from electronic annotation /// 0007165 // signal transduction // inferred from electronic annotation /// 0007623 // circadian rhythm // inferred from direct assay /// 0048511 // rhythmic process // inferred from electronic annotation	0005634 // nucleus // inferred from physical interaction /// 0005634 // nucleus // inferred from electronic annotation /// 0005737 // cytoplasm // inferred from direct assay /// 0005737 // cytoplasm // inferred from electronic annotation	0004871 // signal transducer activity // inferred from electronic annotation /// 0005515 // protein binding // inferred from physical interaction	period homolog 2 (Drosophila)
1442025_a_at	4.17496	up
1439163_at	4.02177	up	Zbtb16	235320	0001501 // skeletal system development // inferred from mutant phenotype /// 0001823 // mesonephros development // inferred from direct assay /// 0007417 // central nervous system development // inferred from direct assay /// 0008285 // negative regulation of cell proliferation // inferred from mutant phenotype /// 0009880 // embryonic pattern specification // inferred from mutant phenotype /// 0…	0005622 // intracellular // inferred from electronic annotation /// 0005634 // nucleus // inferred from direct assay /// 0005634 // nucleus // not recorded /// 0005634 // nucleus // inferred from sequence or structural similarity /// 0005829 // cytosol // inferred from electronic annotation /// 0005886 // plasma membrane // inferred from electronic annotation /// 0016607 // nuclear speck // infer…	0003676 // nucleic acid binding // inferred from electronic annotation /// 0003677 // DNA binding // not recorded /// 0003690 // double-stranded DNA binding // inferred from electronic annotation /// 0003700 // transcription factor activity // inferred from electronic annotation /// 0005515 // protein binding // inferred from physical interaction /// 0005515 // protein binding // not recorded ///…	zinc finger and BTB domain containing 16
1418174_at	3.78477	up	Dbp	13170	0006350 // transcription // inferred from electronic annotation /// 0006355 // regulation of transcription, DNA-dependent // traceable author statement /// 0006355 // regulation of transcription, DNA-dependent // inferred from electronic annotation /// 0007623 // circadian rhythm // traceable author statement /// 0042127 // regulation of cell proliferation // inferred from electronic annotation /…	0005634 // nucleus // inferred from electronic annotation	0003677 // DNA binding // inferred from electronic annotation /// 0003700 // transcription factor activity // inferred from electronic annotation /// 0043565 // sequence-specific DNA binding // inferred from electronic annotation /// 0046983 // protein dimerization activity // inferred from electronic annotation	D site albumin promoter binding protein
1419874_x_at	3.66297	up	Zbtb16	235320	0001501 // skeletal system development // inferred from mutant phenotype /// 0001823 // mesonephros development // inferred from direct assay /// 0007417 // central nervous system development // inferred from direct assay /// 0008285 // negative regulation of cell proliferation // inferred from mutant phenotype /// 0009880 // embryonic pattern specification // inferred from mutant phenotype /// 0…	0005622 // intracellular // inferred from electronic annotation /// 0005634 // nucleus // inferred from direct assay /// 0005634 // nucleus // not recorded /// 0005634 // nucleus // inferred from sequence or structural similarity /// 0005829 // cytosol // inferred from electronic annotation /// 0005886 // plasma membrane // inferred from electronic annotation /// 0016607 // nuclear speck // infer…	0003676 // nucleic acid binding // inferred from electronic annotation /// 0003677 // DNA binding // not recorded /// 0003690 // double-stranded DNA binding // inferred from electronic annotation /// 0003700 // transcription factor activity // inferred from electronic annotation /// 0005515 // protein binding // inferred from physical interaction /// 0005515 // protein binding // not recorded ///…	zinc finger and BTB domain containing 16
1442026_at	3.55104	up
1429206_at	3.53791	up	Rhobtb1	69288	0007264 // small GTPase mediated signal transduction // inferred from electronic annotation	0005622 // intracellular // inferred from electronic annotation	0000166 // nucleotide binding // inferred from electronic annotation /// 0005515 // protein binding // inferred from electronic annotation /// 0005525 // GTP binding // inferred from electronic annotation	Rho-related BTB domain containing 1
1429656_at	3.1476	up	Rhobtb1	69288	0007264 // small GTPase mediated signal transduction // inferred from electronic annotation	0005622 // intracellular // inferred from electronic annotation	0000166 // nucleotide binding // inferred from electronic annotation /// 0005515 // protein binding // inferred from electronic annotation /// 0005525 // GTP binding // inferred from electronic annotation	Rho-related BTB domain containing 1
1416953_at	2.98607	up	Ctgf	14219	0001502 // cartilage condensation // inferred from direct assay /// 0001503 // ossification // inferred from mutant phenotype /// 0001525 // angiogenesis // inferred from direct assay /// 0001525 // angiogenesis // inferred from mutant phenotype /// 0001558 // regulation of cell growth // inferred from electronic annotation /// 0006260 // DNA replication // inferred from electronic annotation ///…	0005576 // extracellular region // inferred from direct assay /// 0005576 // extracellular region // inferred from electronic annotation /// 0005578 // proteinaceous extracellular matrix // inferred from direct assay /// 0005578 // proteinaceous extracellular matrix // inferred from electronic annotation	0005178 // integrin binding // inferred from direct assay /// 0005515 // protein binding // inferred from electronic annotation /// 0005520 // insulin-like growth factor binding // inferred from electronic annotation /// 0008083 // growth factor activity // inferred from electronic annotation /// 0008201 // heparin binding // inferred from direct assay /// 0008201 // heparin binding // inferred f…	connective tissue growth factor
1423858_a_at	2.8476	up	Hmgcs2	15360	0006694 // steroid biosynthetic process // inferred from electronic annotation /// 0006695 // cholesterol biosynthetic process // inferred from electronic annotation /// 0007584 // response to nutrient // inferred from electronic annotation /// 0008152 // metabolic process // inferred from electronic annotation /// 0008299 // isoprenoid biosynthetic process // inferred from electronic annotation …	0005739 // mitochondrion // inferred from direct assay /// 0005739 // mitochondrion // inferred from electronic annotation /// 0005743 // mitochondrial inner membrane // inferred from direct assay	0003824 // catalytic activity // inferred from electronic annotation /// 0004421 // hydroxymethylglutaryl-CoA synthase activity // inferred from electronic annotation /// 0016740 // transferase activity // inferred from electronic annotation	3-hydroxy-3-methylglutaryl-Coenzyme A synthase 2
1456986_at	2.81734	up
1416332_at	2.77114	up	Cirbp	12696	0006950 // response to stress // inferred from electronic annotation	0005634 // nucleus // inferred from electronic annotation	0000166 // nucleotide binding // inferred from electronic annotation /// 0003676 // nucleic acid binding // inferred from electronic annotation /// 0003723 // RNA binding // inferred from electronic annotation	cold inducible RNA binding protein
1423405_at	2.75363	up	Timp4	110595		0005576 // extracellular region // inferred from electronic annotation /// 0005578 // proteinaceous extracellular matrix // inferred from electronic annotation	0004857 // enzyme inhibitor activity // inferred from electronic annotation /// 0005515 // protein binding // inferred from electronic annotation /// 0008191 // metalloendopeptidase inhibitor activity // inferred from electronic annotation	tissue inhibitor of metalloproteinase 4
1459557_at	2.70512	up
1449851_at	2.64375	up	Per1	18626	0006350 // transcription // inferred from electronic annotation /// 0006355 // regulation of transcription, DNA-dependent // inferred from electronic annotation /// 0007165 // signal transduction // inferred from electronic annotation /// 0007623 // circadian rhythm // traceable author statement /// 0016481 // negative regulation of transcription // inferred from direct assay /// 0048511 // rhyth…	0005634 // nucleus // inferred from direct assay /// 0005634 // nucleus // inferred from electronic annotation /// 0005737 // cytoplasm // inferred from electronic annotation	0004871 // signal transducer activity // inferred from electronic annotation /// 0005515 // protein binding // inferred from physical interaction	period homolog 1 (Drosophila)
1428352_at	2.57649	up	Arrdc2	70807				arrestin domain containing 2
1420342_at	2.50667	up	Gdap10	14546	0032526 // response to retinoic acid // inferred from direct assay			ganglioside-induced differentiation-associated-protein 10
1451069_at	2.50337	up	Pim3	223775	0006468 // protein amino acid phosphorylation // inferred from electronic annotation		0000166 // nucleotide binding // inferred from electronic annotation /// 0004672 // protein kinase activity // inferred from electronic annotation /// 0004674 // protein serine/threonine kinase activity // inferred from electronic annotation /// 0005524 // ATP binding // inferred from electronic annotation /// 0016301 // kinase activity // inferred from electronic annotation /// 0016740 // transf…	proviral integration site 3
1428942_at	2.48764	up	Mt2	17750	0006882 // cellular zinc ion homeostasis // inferred from mutant phenotype /// 0007263 // nitric oxide mediated signal transduction // inferred from mutant phenotype /// 0010273 // detoxification of copper ion // inferred from mutant phenotype		0008270 // zinc ion binding // traceable author statement /// 0046872 // metal ion binding // inferred from electronic annotation	metallothionein 2
1438815_at	2.46618	up	Hist2h2aa1 /// Hist2h2aa2	15267 /// 319192	0006334 // nucleosome assembly // inferred from electronic annotation /// 0006334 // nucleosome assembly // non-traceable author statement	0000786 // nucleosome // inferred from electronic annotation /// 0005634 // nucleus // inferred from electronic annotation /// 0005694 // chromosome // inferred from electronic annotation	0003677 // DNA binding // inferred from electronic annotation /// 0003677 // DNA binding // non-traceable author statement	histone cluster 2, H2aa1 /// histone cluster 2, H2aa2
1437100_x_at	2.46064	up	Pim3	223775	0006468 // protein amino acid phosphorylation // inferred from electronic annotation		0000166 // nucleotide binding // inferred from electronic annotation /// 0004672 // protein kinase activity // inferred from electronic annotation /// 0004674 // protein serine/threonine kinase activity // inferred from electronic annotation /// 0005524 // ATP binding // inferred from electronic annotation /// 0016301 // kinase activity // inferred from electronic annotation /// 0016740 // transf…	proviral integration site 3
1428682_at	2.43483	up	Zc3h6	78751			0003676 // nucleic acid binding // inferred from electronic annotation /// 0008270 // zinc ion binding // inferred from electronic annotation /// 0046872 // metal ion binding // inferred from electronic annotation	zinc finger CCCH type containing 6
1415996_at	2.41951	up	Txnip	56338	0006350 // transcription // inferred from electronic annotation /// 0006355 // regulation of transcription, DNA-dependent // inferred from electronic annotation /// 0006979 // response to oxidative stress // inferred from direct assay /// 0007049 // cell cycle // inferred from electronic annotation /// 0030216 // keratinocyte differentiation // inferred from electronic annotation /// 0048008 // p…	0005737 // cytoplasm // inferred from direct assay /// 0005737 // cytoplasm // inferred from electronic annotation	0004857 // enzyme inhibitor activity // inferred from direct assay /// 0005515 // protein binding // inferred from physical interaction /// 0005515 // protein binding // inferred from electronic annotation	thioredoxin interacting protein
1433837_at	2.34058	up	8430408G22Rik	213393		0005739 // mitochondrion // inferred from electronic annotation		RIKEN cDNA 8430408G22 gene
1418901_at	2.32744	up	Cebpb	12608	0001892 // embryonic placenta development // inferred from genetic interaction /// 0006350 // transcription // inferred from electronic annotation /// 0006355 // regulation of transcription, DNA-dependent // inferred from electronic annotation /// 0006916 // anti-apoptosis // inferred from direct assay /// 0006917 // induction of apoptosis // inferred from direct assay /// 0030182 // neuron diffe…	0005634 // nucleus // inferred from direct assay /// 0005634 // nucleus // inferred from electronic annotation /// 0005737 // cytoplasm // inferred from direct assay	0003677 // DNA binding // inferred from direct assay /// 0003677 // DNA binding // inferred from electronic annotation /// 0003700 // transcription factor activity // inferred from electronic annotation /// 0003705 // RNA polymerase II transcription factor activity, enhancer binding // inferred from direct assay /// 0005515 // protein binding // inferred from physical interaction /// 0016563 // t…	CCAAT/enhancer binding protein (C/EBP), beta
1415997_at	2.30943	up	Txnip	56338	0006350 // transcription // inferred from electronic annotation /// 0006355 // regulation of transcription, DNA-dependent // inferred from electronic annotation /// 0006979 // response to oxidative stress // inferred from direct assay /// 0007049 // cell cycle // inferred from electronic annotation /// 0030216 // keratinocyte differentiation // inferred from electronic annotation /// 0048008 // p…	0005737 // cytoplasm // inferred from direct assay /// 0005737 // cytoplasm // inferred from electronic annotation	0004857 // enzyme inhibitor activity // inferred from direct assay /// 0005515 // protein binding // inferred from physical interaction /// 0005515 // protein binding // inferred from electronic annotation	thioredoxin interacting protein
1450974_at	2.29054	up	Timp4	110595		0005576 // extracellular region // inferred from electronic annotation /// 0005578 // proteinaceous extracellular matrix // inferred from electronic annotation	0004857 // enzyme inhibitor activity // inferred from electronic annotation /// 0005515 // protein binding // inferred from electronic annotation /// 0008191 // metalloendopeptidase inhibitor activity // inferred from electronic annotation	tissue inhibitor of metalloproteinase 4
1452888_at	2.27962	up	1110034G24Rik	73747				RIKEN cDNA 1110034G24 gene
1427345_a_at	2.2443	up	Sult1a1	20887	0006629 // lipid metabolic process // inferred from electronic annotation /// 0008202 // steroid metabolic process // inferred from electronic annotation	0005737 // cytoplasm // inferred from electronic annotation	0000166 // nucleotide binding // inferred from direct assay /// 0004062 // aryl sulfotransferase activity // inferred from electronic annotation /// 0008146 // sulfotransferase activity // inferred from direct assay /// 0008146 // sulfotransferase activity // inferred from electronic annotation /// 0016740 // transferase activity // inferred from electronic annotation /// 0017067 // tyrosine-este…	sulfotransferase family 1A, phenol-preferring, member 1
1418697_at	2.22909	up	Inmt	21743		0005737 // cytoplasm // inferred from electronic annotation	0008168 // methyltransferase activity // inferred from electronic annotation /// 0016740 // transferase activity // inferred from electronic annotation /// 0030748 // amine N-methyltransferase activity // inferred from electronic annotation	indolethylamine N-methyltransferase
1416125_at	2.224	up	Fkbp5	14229	0006457 // protein folding // inferred from electronic annotation	0005634 // nucleus // inferred from electronic annotation /// 0005737 // cytoplasm // inferred from electronic annotation	0003755 // peptidyl-prolyl cis-trans isomerase activity // inferred from electronic annotation /// 0005488 // binding // inferred from electronic annotation /// 0005515 // protein binding // inferred from physical interaction /// 0016853 // isomerase activity // inferred from electronic annotation	FK506 binding protein 5
1434817_s_at	2.21249	up	Rprd2	75137				regulation of nuclear pre-mRNA domain containing 2
1429639_at	2.16666	up	Prei4	74182	0005975 // carbohydrate metabolic process // inferred from electronic annotation /// 0006071 // glycerol metabolic process // inferred from electronic annotation /// 0006629 // lipid metabolic process // inferred from electronic annotation		0003824 // catalytic activity // inferred from electronic annotation /// 0008081 // phosphoric diester hydrolase activity // inferred from electronic annotation /// 0008889 // glycerophosphodiester phosphodiesterase activity // inferred from electronic annotation /// 0016787 // hydrolase activity // inferred from electronic annotation /// 0030246 // carbohydrate binding // inferred from electroni…	preimplantation protein 4
1440225_at	2.13242	up	Gpr116	224792	0007166 // cell surface receptor linked signal transduction // inferred from electronic annotation /// 0007186 // G-protein coupled receptor protein signaling pathway // inferred from electronic annotation /// 0007218 // neuropeptide signaling pathway // inferred from electronic annotation	0005886 // plasma membrane // inferred from electronic annotation /// 0016020 // membrane // inferred from electronic annotation /// 0016021 // integral to membrane // inferred from electronic annotation	0004888 // transmembrane receptor activity // inferred from electronic annotation /// 0004930 // G-protein coupled receptor activity // inferred from electronic annotation	G protein-coupled receptor 116
1445562_at	2.12579	up
1427638_at	2.10689	up	Zbtb16	235320	0001501 // skeletal system development // inferred from mutant phenotype /// 0001823 // mesonephros development // inferred from direct assay /// 0007417 // central nervous system development // inferred from direct assay /// 0008285 // negative regulation of cell proliferation // inferred from mutant phenotype /// 0009880 // embryonic pattern specification // inferred from mutant phenotype /// 0…	0005622 // intracellular // inferred from electronic annotation /// 0005634 // nucleus // inferred from direct assay /// 0005634 // nucleus // not recorded /// 0005634 // nucleus // inferred from sequence or structural similarity /// 0005829 // cytosol // inferred from electronic annotation /// 0005886 // plasma membrane // inferred from electronic annotation /// 0016607 // nuclear speck // infer…	0003676 // nucleic acid binding // inferred from electronic annotation /// 0003677 // DNA binding // not recorded /// 0003690 // double-stranded DNA binding // inferred from electronic annotation /// 0003700 // transcription factor activity // inferred from electronic annotation /// 0005515 // protein binding // inferred from physical interaction /// 0005515 // protein binding // not recorded ///…	zinc finger and BTB domain containing 16
1421087_at	2.10266	up	Per3	18628	0006350 // transcription // inferred from electronic annotation /// 0006355 // regulation of transcription, DNA-dependent // inferred from electronic annotation /// 0007165 // signal transduction // inferred from electronic annotation /// 0007623 // circadian rhythm // inferred from direct assay /// 0048511 // rhythmic process // inferred from electronic annotation	0005634 // nucleus // inferred from electronic annotation /// 0005737 // cytoplasm // inferred from electronic annotation	0004871 // signal transducer activity // inferred from electronic annotation	period homolog 3 (Drosophila)
1416958_at	2.10265	up	Nr1d2	353187	0006350 // transcription // inferred from electronic annotation /// 0006355 // regulation of transcription, DNA-dependent // inferred from direct assay /// 0006355 // regulation of transcription, DNA-dependent // inferred from electronic annotation	0005634 // nucleus // inferred from electronic annotation	0003677 // DNA binding // inferred from direct assay /// 0003677 // DNA binding // inferred from electronic annotation /// 0003700 // transcription factor activity // inferred from direct assay /// 0003700 // transcription factor activity // inferred from electronic annotation /// 0003707 // steroid hormone receptor activity // inferred from electronic annotation /// 0004872 // receptor activity …	nuclear receptor subfamily 1, group D, member 2
1447891_at	2.09727	up
1458324_x_at	2.09048	up
1434642_at	2.08356	up	Hsd17b11	114664	0006694 // steroid biosynthetic process // inferred from electronic annotation /// 0006710 // androgen catabolic process // inferred from electronic annotation /// 0008152 // metabolic process // inferred from electronic annotation /// 0008610 // lipid biosynthetic process // inferred from electronic annotation /// 0055114 // oxidation reduction // inferred from electronic annotation	0005576 // extracellular region // inferred from electronic annotation /// 0005737 // cytoplasm // inferred from electronic annotation	0003824 // catalytic activity // inferred from electronic annotation /// 0004303 // estradiol 17-beta-dehydrogenase activity // inferred from electronic annotation /// 0005488 // binding // inferred from electronic annotation /// 0016229 // steroid dehydrogenase activity // inferred from electronic annotation /// 0016491 // oxidoreductase activity // inferred from electronic annotation	hydroxysteroid (17-beta) dehydrogenase 11
1427844_a_at	2.07593	up	Cebpb	12608	0001892 // embryonic placenta development // inferred from genetic interaction /// 0006350 // transcription // inferred from electronic annotation /// 0006355 // regulation of transcription, DNA-dependent // inferred from electronic annotation /// 0006916 // anti-apoptosis // inferred from direct assay /// 0006917 // induction of apoptosis // inferred from direct assay /// 0030182 // neuron diffe…	0005634 // nucleus // inferred from direct assay /// 0005634 // nucleus // inferred from electronic annotation /// 0005737 // cytoplasm // inferred from direct assay	0003677 // DNA binding // inferred from direct assay /// 0003677 // DNA binding // inferred from electronic annotation /// 0003700 // transcription factor activity // inferred from electronic annotation /// 0003705 // RNA polymerase II transcription factor activity, enhancer binding // inferred from direct assay /// 0005515 // protein binding // inferred from physical interaction /// 0016563 // t…	CCAAT/enhancer binding protein (C/EBP), beta
1437584_at	2.06941	up
1451006_at	2.04542	up	Xdh	22436	0007595 // lactation // inferred from mutant phenotype /// 0010044 // response to aluminum ion // inferred from electronic annotation /// 0030856 // regulation of epithelial cell differentiation // inferred from mutant phenotype /// 0045453 // bone resorption // inferred from electronic annotation /// 0055114 // oxidation reduction // inferred from direct assay /// 0055114 // oxidation reduction …	0005777 // peroxisome // inferred from electronic annotation /// 0005829 // cytosol // inferred from electronic annotation	0003676 // nucleic acid binding // inferred from electronic annotation /// 0003824 // catalytic activity // inferred from electronic annotation /// 0004854 // xanthine dehydrogenase activity // inferred from direct assay /// 0004854 // xanthine dehydrogenase activity // inferred from electronic annotation /// 0004855 // xanthine oxidase activity // inferred from electronic annotation /// 0005506 …	xanthine dehydrogenase
1453303_at	2.04125	up	4833417J20Rik	74604				RIKEN cDNA 4833417J20 gene
1423860_at	2.02869	up	Ptgds	19215	0001516 // prostaglandin biosynthetic process // inferred from electronic annotation /// 0001516 // prostaglandin biosynthetic process // inferred from sequence or structural similarity /// 0006629 // lipid metabolic process // inferred from electronic annotation /// 0006633 // fatty acid biosynthetic process // inferred from electronic annotation /// 0006810 // transport // inferred from electro…	0005576 // extracellular region // inferred from direct assay /// 0005576 // extracellular region // inferred from electronic annotation /// 0005634 // nucleus // inferred from electronic annotation /// 0005737 // cytoplasm // inferred from electronic annotation /// 0005783 // endoplasmic reticulum // inferred from electronic annotation /// 0005791 // rough endoplasmic reticulum // inferred from …	0004667 // prostaglandin-D synthase activity // inferred from electronic annotation /// 0004667 // prostaglandin-D synthase activity // inferred from sequence or structural similarity /// 0005215 // transporter activity // inferred from electronic annotation /// 0005215 // transporter activity // inferred from sequence or structural similarity /// 0005488 // binding // inferred from electronic an…	prostaglandin D2 synthase (brain)
1435459_at	2.02827	up	Fmo2	55990	0006800 // oxygen and reactive oxygen species metabolic process // inferred from direct assay /// 0055114 // oxidation reduction // inferred from electronic annotation	0005783 // endoplasmic reticulum // inferred from electronic annotation /// 0005789 // endoplasmic reticulum membrane // inferred from electronic annotation /// 0005792 // microsome // inferred from electronic annotation /// 0016020 // membrane // inferred from electronic annotation /// 0016021 // integral to membrane // inferred from electronic annotation /// 0031227 // intrinsic to endoplasmic …	0000287 // magnesium ion binding // inferred from electronic annotation /// 0004497 // monooxygenase activity // inferred from direct assay /// 0004497 // monooxygenase activity // inferred from electronic annotation /// 0004499 // flavin-containing monooxygenase activity // inferred from electronic annotation /// 0016491 // oxidoreductase activity // inferred from electronic annotation /// 00506…	flavin containing monooxygenase 2
1449249_at	2.01681	up	Pcdh7	54216	0007155 // cell adhesion // inferred from electronic annotation /// 0007156 // homophilic cell adhesion // inferred from electronic annotation	0005886 // plasma membrane // inferred from electronic annotation /// 0005887 // integral to plasma membrane // inferred from sequence or structural similarity /// 0016020 // membrane // inferred from electronic annotation /// 0016021 // integral to membrane // inferred from electronic annotation	0005509 // calcium ion binding // inferred from electronic annotation /// 0005515 // protein binding // inferred from physical interaction /// 0005515 // protein binding // inferred from electronic annotation	protocadherin 7
1437868_at	2.01176	up	Fam46a	212943				family with sequence similarity 46, member A
1435833_at	1.99604	up
1457915_at	1.98923	up	4833442J19Rik	320204	0006479 // protein amino acid methylation // inferred from electronic annotation	0005737 // cytoplasm // inferred from electronic annotation	0008276 // protein methyltransferase activity // inferred from electronic annotation	RIKEN cDNA 4833442J19 gene
1453435_a_at	1.9887	up	Fmo2	55990	0006800 // oxygen and reactive oxygen species metabolic process // inferred from direct assay /// 0055114 // oxidation reduction // inferred from electronic annotation	0005783 // endoplasmic reticulum // inferred from electronic annotation /// 0005789 // endoplasmic reticulum membrane // inferred from electronic annotation /// 0005792 // microsome // inferred from electronic annotation /// 0016020 // membrane // inferred from electronic annotation /// 0016021 // integral to membrane // inferred from electronic annotation /// 0031227 // intrinsic to endoplasmic …	0000287 // magnesium ion binding // inferred from electronic annotation /// 0004497 // monooxygenase activity // inferred from direct assay /// 0004497 // monooxygenase activity // inferred from electronic annotation /// 0004499 // flavin-containing monooxygenase activity // inferred from electronic annotation /// 0016491 // oxidoreductase activity // inferred from electronic annotation /// 00506…	flavin containing monooxygenase 2
1447988_at	1.98535	up
1439537_at	1.96979	up
1450184_s_at	1.96399	up	Tef	21685	0006350 // transcription // inferred from electronic annotation /// 0006355 // regulation of transcription, DNA-dependent // inferred from electronic annotation /// 0045944 // positive regulation of transcription from RNA polymerase II promoter // inferred from direct assay /// 0048511 // rhythmic process // inferred from electronic annotation	0005634 // nucleus // inferred by curator /// 0005634 // nucleus // inferred from electronic annotation	0003677 // DNA binding // inferred from electronic annotation /// 0003690 // double-stranded DNA binding // inferred from direct assay /// 0003700 // transcription factor activity // inferred from electronic annotation /// 0005515 // protein binding // inferred from physical interaction /// 0016563 // transcription activator activity // inferred from direct assay /// 0043565 // sequence-specific …	thyrotroph embryonic factor
1436994_a_at	1.95939	up	Hist1h1c	50708	0006334 // nucleosome assembly // inferred from electronic annotation /// 0016584 // nucleosome positioning // inferred from mutant phenotype	0000786 // nucleosome // inferred from electronic annotation /// 0005634 // nucleus // inferred from electronic annotation /// 0005694 // chromosome // inferred from electronic annotation	0003677 // DNA binding // inferred from direct assay /// 0003677 // DNA binding // inferred from electronic annotation /// 0005515 // protein binding // inferred from physical interaction	histone cluster 1, H1c
1422571_at	1.94587	up	Thbs2	21826	0007155 // cell adhesion // inferred from electronic annotation	0005576 // extracellular region // inferred from electronic annotation	0005198 // structural molecule activity // inferred from electronic annotation /// 0005509 // calcium ion binding // inferred from electronic annotation /// 0005515 // protein binding // inferred from electronic annotation /// 0008201 // heparin binding // inferred from electronic annotation	thrombospondin 2
1457549_at	1.9378	up
1416959_at	1.9281	up	Nr1d2	353187	0006350 // transcription // inferred from electronic annotation /// 0006355 // regulation of transcription, DNA-dependent // inferred from direct assay /// 0006355 // regulation of transcription, DNA-dependent // inferred from electronic annotation	0005634 // nucleus // inferred from electronic annotation	0003677 // DNA binding // inferred from direct assay /// 0003677 // DNA binding // inferred from electronic annotation /// 0003700 // transcription factor activity // inferred from direct assay /// 0003700 // transcription factor activity // inferred from electronic annotation /// 0003707 // steroid hormone receptor activity // inferred from electronic annotation /// 0004872 // receptor activity …	nuclear receptor subfamily 1, group D, member 2
1435026_at	1.9155	up	Spock2	94214	0007165 // signal transduction // inferred from electronic annotation /// 0010811 // positive regulation of cell-substrate adhesion // inferred from direct assay /// 0019800 // peptide cross-linking via chondroitin 4-sulfate glycosaminoglycan // inferred from direct assay /// 0030198 // extracellular matrix organization // inferred from direct assay	0005576 // extracellular region // inferred from electronic annotation /// 0005578 // proteinaceous extracellular matrix // inferred from electronic annotation	0005509 // calcium ion binding // inferred from sequence or structural similarity /// 0005509 // calcium ion binding // inferred from electronic annotation /// 0005539 // glycosaminoglycan binding // inferred from direct assay /// 0050840 // extracellular matrix binding // inferred from direct assay	sparc/osteonectin, cwcv and kazal-like domains proteoglycan 2
1448276_at	1.90871	up	Tspan4	64540		0016020 // membrane // inferred from electronic annotation /// 0016021 // integral to membrane // inferred from electronic annotation	0005515 // protein binding // inferred from physical interaction	tetraspanin 4
1423145_a_at	1.89869	up	Tcap	21393	0001756 // somitogenesis // inferred from expression pattern /// 0007512 // adult heart development // inferred from expression pattern /// 0030916 // otic vesicle formation // inferred from expression pattern /// 0045214 // sarcomere organization // not recorded	0005737 // cytoplasm // inferred from electronic annotation /// 0030018 // Z disc // not recorded /// 0030018 // Z disc // inferred from direct assay /// 0030018 // Z disc // inferred from electronic annotation /// 0031674 // I band // inferred from direct assay	0005515 // protein binding // not recorded /// 0005515 // protein binding // inferred from electronic annotation	titin-cap
1434203_at	1.89092	up	Fam107a	268709	0001558 // regulation of cell growth // inferred from electronic annotation	0005634 // nucleus // inferred from electronic annotation	0005515 // protein binding // inferred from electronic annotation	family with sequence similarity 107, member A
1448961_at	1.88712	up	Plscr2	18828		0016020 // membrane // inferred from electronic annotation /// 0016021 // integral to membrane // inferred from electronic annotation	0005509 // calcium ion binding // inferred from electronic annotation /// 0005515 // protein binding // inferred from physical interaction /// 0017124 // SH3 domain binding // inferred from electronic annotation	phospholipid scramblase 2
1424175_at	1.87916	up	Tef	21685	0006350 // transcription // inferred from electronic annotation /// 0006355 // regulation of transcription, DNA-dependent // inferred from electronic annotation /// 0045944 // positive regulation of transcription from RNA polymerase II promoter // inferred from direct assay /// 0048511 // rhythmic process // inferred from electronic annotation	0005634 // nucleus // inferred by curator /// 0005634 // nucleus // inferred from electronic annotation	0003677 // DNA binding // inferred from electronic annotation /// 0003690 // double-stranded DNA binding // inferred from direct assay /// 0003700 // transcription factor activity // inferred from electronic annotation /// 0005515 // protein binding // inferred from physical interaction /// 0016563 // transcription activator activity // inferred from direct assay /// 0043565 // sequence-specific …	thyrotroph embryonic factor
1417603_at	1.87248	up	Per2	18627	0006350 // transcription // inferred from electronic annotation /// 0006355 // regulation of transcription, DNA-dependent // inferred from electronic annotation /// 0007165 // signal transduction // inferred from electronic annotation /// 0007623 // circadian rhythm // inferred from direct assay /// 0048511 // rhythmic process // inferred from electronic annotation	0005634 // nucleus // inferred from physical interaction /// 0005634 // nucleus // inferred from electronic annotation /// 0005737 // cytoplasm // inferred from direct assay /// 0005737 // cytoplasm // inferred from electronic annotation	0004871 // signal transducer activity // inferred from electronic annotation /// 0005515 // protein binding // inferred from physical interaction	period homolog 2 (Drosophila)
1425514_at	1.86821	up	Pik3r1	18708	0001953 // negative regulation of cell-matrix adhesion // inferred from genetic interaction /// 0006468 // protein amino acid phosphorylation // inferred from direct assay /// 0007165 // signal transduction // inferred from electronic annotation /// 0008286 // insulin receptor signaling pathway // inferred from electronic annotation /// 0008286 // insulin receptor signaling pathway // inferred fr…	0005622 // intracellular // inferred from electronic annotation /// 0005737 // cytoplasm // inferred from direct assay /// 0005737 // cytoplasm // inferred from electronic annotation /// 0005829 // cytosol // inferred from direct assay /// 0005942 // phosphoinositide 3-kinase complex // traceable author statement /// 0005942 // phosphoinositide 3-kinase complex // inferred from electronic annotat…	0005158 // insulin receptor binding // inferred from electronic annotation /// 0005158 // insulin receptor binding // inferred from sequence or structural similarity /// 0005159 // insulin-like growth factor receptor binding // inferred from electronic annotation /// 0005159 // insulin-like growth factor receptor binding // inferred from sequence or structural similarity /// 0005515 // protein bi…	phosphatidylinositol 3-kinase, regulatory subunit, polypeptide 1 (p85 alpha)
1435344_at	1.86705	up	Tfdp2	211586	0006350 // transcription // inferred from electronic annotation /// 0006355 // regulation of transcription, DNA-dependent // inferred from direct assay /// 0006355 // regulation of transcription, DNA-dependent // inferred from electronic annotation /// 0007049 // cell cycle // inferred from electronic annotation	0005634 // nucleus // inferred from electronic annotation /// 0005635 // nuclear envelope // traceable author statement /// 0005667 // transcription factor complex // inferred by curator /// 0005667 // transcription factor complex // inferred from electronic annotation	0003677 // DNA binding // inferred from electronic annotation /// 0003700 // transcription factor activity // inferred from direct assay /// 0003700 // transcription factor activity // inferred from electronic annotation	transcription factor Dp 2
1427202_at	1.85692	up	4833442J19Rik	320204	0006479 // protein amino acid methylation // inferred from electronic annotation	0005737 // cytoplasm // inferred from electronic annotation	0008276 // protein methyltransferase activity // inferred from electronic annotation	RIKEN cDNA 4833442J19 gene
1417169_at	1.85526	up	Usp2	53376	0006511 // ubiquitin-dependent protein catabolic process // inferred from electronic annotation /// 0019941 // modification-dependent protein catabolic process // inferred from electronic annotation	0005737 // cytoplasm // inferred from electronic annotation /// 0005813 // centrosome // inferred from electronic annotation /// 0005886 // plasma membrane // inferred from electronic annotation	0004221 // ubiquitin thiolesterase activity // inferred from electronic annotation /// 0008233 // peptidase activity // inferred from electronic annotation /// 0008234 // cysteine-type peptidase activity // inferred from electronic annotation /// 0016787 // hydrolase activity // inferred from electronic annotation	ubiquitin specific peptidase 2
1450663_at	1.85196	up	Thbs2	21826	0007155 // cell adhesion // inferred from electronic annotation	0005576 // extracellular region // inferred from electronic annotation	0005198 // structural molecule activity // inferred from electronic annotation /// 0005509 // calcium ion binding // inferred from electronic annotation /// 0005515 // protein binding // inferred from electronic annotation /// 0008201 // heparin binding // inferred from electronic annotation	thrombospondin 2
1422905_s_at	1.85057	up	Fmo2	55990	0006800 // oxygen and reactive oxygen species metabolic process // inferred from direct assay /// 0055114 // oxidation reduction // inferred from electronic annotation	0005783 // endoplasmic reticulum // inferred from electronic annotation /// 0005789 // endoplasmic reticulum membrane // inferred from electronic annotation /// 0005792 // microsome // inferred from electronic annotation /// 0016020 // membrane // inferred from electronic annotation /// 0016021 // integral to membrane // inferred from electronic annotation /// 0031227 // intrinsic to endoplasmic …	0000287 // magnesium ion binding // inferred from electronic annotation /// 0004497 // monooxygenase activity // inferred from direct assay /// 0004497 // monooxygenase activity // inferred from electronic annotation /// 0004499 // flavin-containing monooxygenase activity // inferred from electronic annotation /// 0016491 // oxidoreductase activity // inferred from electronic annotation /// 00506…	flavin containing monooxygenase 2
1429144_at	1.84978	up	Prei4	74182	0005975 // carbohydrate metabolic process // inferred from electronic annotation /// 0006071 // glycerol metabolic process // inferred from electronic annotation /// 0006629 // lipid metabolic process // inferred from electronic annotation		0003824 // catalytic activity // inferred from electronic annotation /// 0008081 // phosphoric diester hydrolase activity // inferred from electronic annotation /// 0008889 // glycerophosphodiester phosphodiesterase activity // inferred from electronic annotation /// 0016787 // hydrolase activity // inferred from electronic annotation /// 0030246 // carbohydrate binding // inferred from electroni…	preimplantation protein 4
1440443_at	1.84641	up	E030016H06Rik	402722				RIKEN cDNA E030016H06 gene
1422660_at	1.84279	up	Rbm3	19652	0006412 // translation // inferred from direct assay /// 0009409 // response to cold // inferred from direct assay /// 0035196 // gene silencing by miRNA, production of miRNAs // inferred from direct assay		0000166 // nucleotide binding // inferred from electronic annotation /// 0003676 // nucleic acid binding // inferred from electronic annotation /// 0003723 // RNA binding // inferred from electronic annotation /// 0043023 // ribosomal large subunit binding // inferred from physical interaction	RNA binding motif protein 3
1449335_at	1.84072	up	Timp3	21859	0007169 // transmembrane receptor protein tyrosine kinase signaling pathway // non-traceable author statement /// 0014070 // response to organic cyclic substance // inferred from electronic annotation /// 0042246 // tissue regeneration // inferred from electronic annotation /// 0043627 // response to estrogen stimulus // inferred from electronic annotation	0005576 // extracellular region // inferred from electronic annotation /// 0005578 // proteinaceous extracellular matrix // inferred from electronic annotation /// 0005604 // basement membrane // inferred from direct assay	0004857 // enzyme inhibitor activity // inferred from electronic annotation /// 0005515 // protein binding // inferred from electronic annotation /// 0008191 // metalloendopeptidase inhibitor activity // inferred from electronic annotation	tissue inhibitor of metalloproteinase 3
1440424_at	1.83753	up	Tnnt2	21956	0006936 // muscle contraction // inferred from direct assay /// 0007507 // heart development // inferred from mutant phenotype /// 0008016 // regulation of heart contraction // inferred from mutant phenotype /// 0045214 // sarcomere organization // inferred from mutant phenotype /// 0055009 // atrial cardiac muscle morphogenesis // inferred from mutant phenotype /// 0055010 // ventricular cardiac…	0005737 // cytoplasm // inferred from direct assay /// 0005861 // troponin complex // inferred from direct assay /// 0030016 // myofibril // inferred from direct assay /// 0030017 // sarcomere // inferred from direct assay	0005200 // structural constituent of cytoskeleton // inferred from direct assay	troponin T2, cardiac
1419089_at	1.81108	up	Timp3	21859	0007169 // transmembrane receptor protein tyrosine kinase signaling pathway // non-traceable author statement /// 0014070 // response to organic cyclic substance // inferred from electronic annotation /// 0042246 // tissue regeneration // inferred from electronic annotation /// 0043627 // response to estrogen stimulus // inferred from electronic annotation	0005576 // extracellular region // inferred from electronic annotation /// 0005578 // proteinaceous extracellular matrix // inferred from electronic annotation /// 0005604 // basement membrane // inferred from direct assay	0004857 // enzyme inhibitor activity // inferred from electronic annotation /// 0005515 // protein binding // inferred from electronic annotation /// 0008191 // metalloendopeptidase inhibitor activity // inferred from electronic annotation	tissue inhibitor of metalloproteinase 3
1448667_x_at	1.80594	up	Tob2	57259	0010468 // regulation of gene expression // inferred from mutant phenotype /// 0045671 // negative regulation of osteoclast differentiation // inferred from mutant phenotype /// 0045778 // positive regulation of ossification // inferred from mutant phenotype		0042809 // vitamin D receptor binding // inferred from physical interaction	transducer of ERBB2, 2
1448181_at	1.80111	up	Klf15	66277	0006350 // transcription // inferred from electronic annotation /// 0006355 // regulation of transcription, DNA-dependent // inferred from electronic annotation /// 0015758 // glucose transport // inferred from direct assay /// 0045893 // positive regulation of transcription, DNA-dependent // inferred from direct assay	0005622 // intracellular // inferred from electronic annotation /// 0005634 // nucleus // inferred from direct assay /// 0005634 // nucleus // inferred from electronic annotation	0003676 // nucleic acid binding // inferred from electronic annotation /// 0003677 // DNA binding // inferred from direct assay /// 0003677 // DNA binding // inferred from sequence or structural similarity /// 0003677 // DNA binding // inferred from electronic annotation /// 0003700 // transcription factor activity // inferred from direct assay /// 0005515 // protein binding // inferred from phys…	Kruppel-like factor 15
1422557_s_at	1.79052	up	Mt1	17748	0006875 // cellular metal ion homeostasis // inferred from direct assay /// 0006882 // cellular zinc ion homeostasis // inferred from mutant phenotype /// 0007263 // nitric oxide mediated signal transduction // inferred from mutant phenotype /// 0010273 // detoxification of copper ion // inferred from genetic interaction	0005764 // lysosome // inferred from direct assay /// 0005829 // cytosol // inferred from direct assay	0005507 // copper ion binding // inferred from direct assay /// 0008270 // zinc ion binding // traceable author statement /// 0046872 // metal ion binding // inferred from direct assay /// 0046872 // metal ion binding // inferred from electronic annotation	metallothionein 1
1417168_a_at	1.78339	up	Usp2	53376	0006511 // ubiquitin-dependent protein catabolic process // inferred from electronic annotation /// 0019941 // modification-dependent protein catabolic process // inferred from electronic annotation	0005737 // cytoplasm // inferred from electronic annotation /// 0005813 // centrosome // inferred from electronic annotation /// 0005886 // plasma membrane // inferred from electronic annotation	0004221 // ubiquitin thiolesterase activity // inferred from electronic annotation /// 0008233 // peptidase activity // inferred from electronic annotation /// 0008234 // cysteine-type peptidase activity // inferred from electronic annotation /// 0016787 // hydrolase activity // inferred from electronic annotation	ubiquitin specific peptidase 2
1428562_at	1.77477	up	2210403K04Rik	67098				RIKEN cDNA 2210403K04 gene
1448185_at	1.77421	up	Herpud1	64209	0006464 // protein modification process // inferred from electronic annotation /// 0006950 // response to stress // inferred from direct assay /// 0006986 // response to unfolded protein // inferred from direct assay /// 0006986 // response to unfolded protein // inferred from electronic annotation	0005783 // endoplasmic reticulum // inferred from electronic annotation /// 0005789 // endoplasmic reticulum membrane // inferred from direct assay /// 0005789 // endoplasmic reticulum membrane // inferred from electronic annotation /// 0016020 // membrane // inferred from electronic annotation /// 0016021 // integral to membrane // inferred from direct assay /// 0016021 // integral to membrane /…		homocysteine-inducible, endoplasmic reticulum stress-inducible, ubiquitin-like domain member 1
1435188_at	1.77414	up	Gm129	229599				gene model 129, (NCBI)
1458176_at	1.7675	up	Per3	18628	0006350 // transcription // inferred from electronic annotation /// 0006355 // regulation of transcription, DNA-dependent // inferred from electronic annotation /// 0007165 // signal transduction // inferred from electronic annotation /// 0007623 // circadian rhythm // inferred from direct assay /// 0048511 // rhythmic process // inferred from electronic annotation	0005634 // nucleus // inferred from electronic annotation /// 0005737 // cytoplasm // inferred from electronic annotation	0004871 // signal transducer activity // inferred from electronic annotation	Period homolog 3 (Drosophila) (Per3), mRNA
1440926_at	1.762	up	Flt1	14254	0001525 // angiogenesis // inferred from mutant phenotype /// 0001525 // angiogenesis // inferred from electronic annotation /// 0001569 // patterning of blood vessels // inferred from mutant phenotype /// 0006468 // protein amino acid phosphorylation // inferred from electronic annotation /// 0007169 // transmembrane receptor protein tyrosine kinase signaling pathway // inferred from electronic …	0016020 // membrane // inferred from electronic annotation /// 0016021 // integral to membrane // inferred from electronic annotation	0000166 // nucleotide binding // inferred from electronic annotation /// 0004672 // protein kinase activity // inferred from electronic annotation /// 0004713 // protein tyrosine kinase activity // inferred from electronic annotation /// 0004714 // transmembrane receptor protein tyrosine kinase activity // inferred from electronic annotation /// 0004872 // receptor activity // inferred from elect…	FMS-like tyrosine kinase 1
1448666_s_at	1.75414	up	Tob2	57259	0010468 // regulation of gene expression // inferred from mutant phenotype /// 0045671 // negative regulation of osteoclast differentiation // inferred from mutant phenotype /// 0045778 // positive regulation of ossification // inferred from mutant phenotype		0042809 // vitamin D receptor binding // inferred from physical interaction	transducer of ERBB2, 2
1428776_at	1.75347	up	Slc10a6	75750	0006810 // transport // inferred from electronic annotation /// 0006811 // ion transport // inferred from electronic annotation /// 0006814 // sodium ion transport // inferred from electronic annotation	0016020 // membrane // inferred from electronic annotation /// 0016021 // integral to membrane // inferred from electronic annotation	0008508 // bile acid:sodium symporter activity // inferred from electronic annotation /// 0015293 // symporter activity // inferred from electronic annotation /// 0031402 // sodium ion binding // inferred from electronic annotation	solute carrier family 10 (sodium/bile acid cotransporter family), member 6
1449065_at	1.75038	up	Acot1 /// LOC100044830	100044830 /// 26897	0001676 // long-chain fatty acid metabolic process // inferred from direct assay /// 0006629 // lipid metabolic process // inferred from electronic annotation /// 0006637 // acyl-CoA metabolic process // traceable author statement /// 0006637 // acyl-CoA metabolic process // inferred from electronic annotation	0005737 // cytoplasm // traceable author statement /// 0005737 // cytoplasm // inferred from electronic annotation	0004091 // carboxylesterase activity // inferred from electronic annotation /// 0016290 // palmitoyl-CoA hydrolase activity // inferred from electronic annotation /// 0016291 // acyl-CoA thioesterase activity // inferred from direct assay /// 0016291 // acyl-CoA thioesterase activity // traceable author statement /// 0016787 // hydrolase activity // inferred from electronic annotation /// 0016790…	acyl-CoA thioesterase 1 /// similar to acyl-CoA thioesterase
1437953_at	1.74748	up	Prei4	74182	0005975 // carbohydrate metabolic process // inferred from electronic annotation /// 0006071 // glycerol metabolic process // inferred from electronic annotation /// 0006629 // lipid metabolic process // inferred from electronic annotation		0003824 // catalytic activity // inferred from electronic annotation /// 0008081 // phosphoric diester hydrolase activity // inferred from electronic annotation /// 0008889 // glycerophosphodiester phosphodiesterase activity // inferred from electronic annotation /// 0016787 // hydrolase activity // inferred from electronic annotation /// 0030246 // carbohydrate binding // inferred from electroni…	preimplantation protein 4
1429900_at	1.74741	up	5330406M23Rik	76671				RIKEN cDNA 5330406M23 gene
1457250_x_at	1.74241	up
1449901_a_at	1.74138	up	Map3k6	53608	0006468 // protein amino acid phosphorylation // inferred from electronic annotation		0000166 // nucleotide binding // inferred from electronic annotation /// 0000287 // magnesium ion binding // inferred from electronic annotation /// 0004672 // protein kinase activity // inferred from electronic annotation /// 0004674 // protein serine/threonine kinase activity // inferred from electronic annotation /// 0004709 // MAP kinase kinase kinase activity // inferred from electronic anno…	mitogen-activated protein kinase kinase kinase 6
1445203_at	1.73735	up	Pdzd2	68070		0030054 // cell junction // not recorded	0005515 // protein binding // not recorded /// 0005515 // protein binding // inferred from electronic annotation	PDZ domain containing 2
1448231_at	1.73603	up	Fkbp5	14229	0006457 // protein folding // inferred from electronic annotation	0005634 // nucleus // inferred from electronic annotation /// 0005737 // cytoplasm // inferred from electronic annotation	0003755 // peptidyl-prolyl cis-trans isomerase activity // inferred from electronic annotation /// 0005488 // binding // inferred from electronic annotation /// 0005515 // protein binding // inferred from physical interaction /// 0016853 // isomerase activity // inferred from electronic annotation	FK506 binding protein 5
1443962_at	1.73532	up	Tfdp2	211586	0006350 // transcription // inferred from electronic annotation /// 0006355 // regulation of transcription, DNA-dependent // inferred from direct assay /// 0006355 // regulation of transcription, DNA-dependent // inferred from electronic annotation /// 0007049 // cell cycle // inferred from electronic annotation	0005634 // nucleus // inferred from electronic annotation /// 0005635 // nuclear envelope // traceable author statement /// 0005667 // transcription factor complex // inferred by curator /// 0005667 // transcription factor complex // inferred from electronic annotation	0003677 // DNA binding // inferred from electronic annotation /// 0003700 // transcription factor activity // inferred from direct assay /// 0003700 // transcription factor activity // inferred from electronic annotation	transcription factor Dp 2
1448949_at	1.72828	up	Car4	12351	0006730 // one-carbon compound metabolic process // inferred from electronic annotation	0005886 // plasma membrane // inferred from electronic annotation /// 0016020 // membrane // inferred from electronic annotation /// 0031225 // anchored to membrane // inferred from electronic annotation	0004089 // carbonate dehydratase activity // inferred from electronic annotation /// 0008270 // zinc ion binding // inferred from electronic annotation /// 0016829 // lyase activity // inferred from electronic annotation /// 0046872 // metal ion binding // inferred from electronic annotation	carbonic anhydrase 4
1450505_a_at	1.72332	up	Fam134b	66270		0016020 // membrane // inferred from electronic annotation /// 0016021 // integral to membrane // inferred from electronic annotation		family with sequence similarity 134, member B
1449334_at	1.71475	up	Timp3	21859	0007169 // transmembrane receptor protein tyrosine kinase signaling pathway // non-traceable author statement /// 0014070 // response to organic cyclic substance // inferred from electronic annotation /// 0042246 // tissue regeneration // inferred from electronic annotation /// 0043627 // response to estrogen stimulus // inferred from electronic annotation	0005576 // extracellular region // inferred from electronic annotation /// 0005578 // proteinaceous extracellular matrix // inferred from electronic annotation /// 0005604 // basement membrane // inferred from direct assay	0004857 // enzyme inhibitor activity // inferred from electronic annotation /// 0005515 // protein binding // inferred from electronic annotation /// 0008191 // metalloendopeptidase inhibitor activity // inferred from electronic annotation	tissue inhibitor of metalloproteinase 3
1428288_at	1.70677	up	Klf9	16601	0006350 // transcription // inferred from electronic annotation /// 0006355 // regulation of transcription, DNA-dependent // inferred from electronic annotation /// 0007566 // embryo implantation // inferred from direct assay /// 0045449 // regulation of transcription // inferred from direct assay /// 0050847 // progesterone receptor signaling pathway // inferred from direct assay	0005622 // intracellular // inferred from electronic annotation /// 0005634 // nucleus // inferred from direct assay /// 0005634 // nucleus // inferred from electronic annotation	0003676 // nucleic acid binding // inferred from electronic annotation /// 0003677 // DNA binding // inferred from sequence or structural similarity /// 0003677 // DNA binding // inferred from electronic annotation /// 0008270 // zinc ion binding // inferred from electronic annotation /// 0030528 // transcription regulator activity // inferred from direct assay /// 0046872 // metal ion binding //…	Kruppel-like factor 9
1416101_a_at	1.70613	up	Hist1h1c	50708	0006334 // nucleosome assembly // inferred from electronic annotation /// 0016584 // nucleosome positioning // inferred from mutant phenotype	0000786 // nucleosome // inferred from electronic annotation /// 0005634 // nucleus // inferred from electronic annotation /// 0005694 // chromosome // inferred from electronic annotation	0003677 // DNA binding // inferred from direct assay /// 0003677 // DNA binding // inferred from electronic annotation /// 0005515 // protein binding // inferred from physical interaction	histone cluster 1, H1c
1455528_at	1.70561	up
1423062_at	1.705	up	Igfbp3	16009	0001558 // regulation of cell growth // inferred from electronic annotation /// 0001649 // osteoblast differentiation // inferred from expression pattern /// 0001933 // negative regulation of protein amino acid phosphorylation // not recorded /// 0001933 // negative regulation of protein amino acid phosphorylation // inferred from electronic annotation /// 0006468 // protein amino acid phosphoryl…	0005576 // extracellular region // inferred from electronic annotation /// 0005615 // extracellular space // inferred from direct assay /// 0005634 // nucleus // not recorded /// 0005634 // nucleus // inferred from electronic annotation	0005520 // insulin-like growth factor binding // inferred from physical interaction /// 0005520 // insulin-like growth factor binding // inferred from electronic annotation /// 0008160 // protein tyrosine phosphatase activator activity // inferred from electronic annotation /// 0008160 // protein tyrosine phosphatase activator activity // inferred from sequence or structural similarity /// 001983…	insulin-like growth factor binding protein 3
1431833_a_at	1.70327	up	Hmgcs2	15360	0006694 // steroid biosynthetic process // inferred from electronic annotation /// 0006695 // cholesterol biosynthetic process // inferred from electronic annotation /// 0007584 // response to nutrient // inferred from electronic annotation /// 0008152 // metabolic process // inferred from electronic annotation /// 0008299 // isoprenoid biosynthetic process // inferred from electronic annotation …	0005739 // mitochondrion // inferred from direct assay /// 0005739 // mitochondrion // inferred from electronic annotation /// 0005743 // mitochondrial inner membrane // inferred from direct assay	0003824 // catalytic activity // inferred from electronic annotation /// 0004421 // hydroxymethylglutaryl-CoA synthase activity // inferred from electronic annotation /// 0016740 // transferase activity // inferred from electronic annotation	3-hydroxy-3-methylglutaryl-Coenzyme A synthase 2
1435626_a_at	1.70134	up	Herpud1	64209	0006464 // protein modification process // inferred from electronic annotation /// 0006950 // response to stress // inferred from direct assay /// 0006986 // response to unfolded protein // inferred from direct assay /// 0006986 // response to unfolded protein // inferred from electronic annotation	0005783 // endoplasmic reticulum // inferred from electronic annotation /// 0005789 // endoplasmic reticulum membrane // inferred from direct assay /// 0005789 // endoplasmic reticulum membrane // inferred from electronic annotation /// 0016020 // membrane // inferred from electronic annotation /// 0016021 // integral to membrane // inferred from direct assay /// 0016021 // integral to membrane /…		homocysteine-inducible, endoplasmic reticulum stress-inducible, ubiquitin-like domain member 1
1423859_a_at	1.69584	up	Ptgds	19215	0001516 // prostaglandin biosynthetic process // inferred from electronic annotation /// 0001516 // prostaglandin biosynthetic process // inferred from sequence or structural similarity /// 0006629 // lipid metabolic process // inferred from electronic annotation /// 0006633 // fatty acid biosynthetic process // inferred from electronic annotation /// 0006810 // transport // inferred from electro…	0005576 // extracellular region // inferred from direct assay /// 0005576 // extracellular region // inferred from electronic annotation /// 0005634 // nucleus // inferred from electronic annotation /// 0005737 // cytoplasm // inferred from electronic annotation /// 0005783 // endoplasmic reticulum // inferred from electronic annotation /// 0005791 // rough endoplasmic reticulum // inferred from …	0004667 // prostaglandin-D synthase activity // inferred from electronic annotation /// 0004667 // prostaglandin-D synthase activity // inferred from sequence or structural similarity /// 0005215 // transporter activity // inferred from electronic annotation /// 0005215 // transporter activity // inferred from sequence or structural similarity /// 0005488 // binding // inferred from electronic an…	prostaglandin D2 synthase (brain)
1423130_a_at	1.69546	up	Sfrs5	20384	0006350 // transcription // inferred from electronic annotation /// 0006355 // regulation of transcription, DNA-dependent // inferred from electronic annotation /// 0006397 // mRNA processing // inferred from electronic annotation /// 0008380 // RNA splicing // inferred from electronic annotation	0005634 // nucleus // inferred from electronic annotation	0000166 // nucleotide binding // inferred from electronic annotation /// 0003676 // nucleic acid binding // inferred from electronic annotation /// 0003723 // RNA binding // inferred from electronic annotation /// 0005515 // protein binding // inferred from electronic annotation /// 0050733 // RS domain binding // inferred from physical interaction	splicing factor, arginine/serine-rich 5 (SRp40, HRS)
1418094_s_at	1.69294	up	Car4	12351	0006730 // one-carbon compound metabolic process // inferred from electronic annotation	0005886 // plasma membrane // inferred from electronic annotation /// 0016020 // membrane // inferred from electronic annotation /// 0031225 // anchored to membrane // inferred from electronic annotation	0004089 // carbonate dehydratase activity // inferred from electronic annotation /// 0008270 // zinc ion binding // inferred from electronic annotation /// 0016829 // lyase activity // inferred from electronic annotation /// 0046872 // metal ion binding // inferred from electronic annotation	carbonic anhydrase 4
1419024_at	1.68688	up	Ptp4a1	19243	0006470 // protein amino acid dephosphorylation // inferred from electronic annotation /// 0007049 // cell cycle // inferred from electronic annotation /// 0007275 // multicellular organismal development // inferred from electronic annotation /// 0016311 // dephosphorylation // inferred from electronic annotation /// 0030335 // positive regulation of cell migration // inferred from direct assay	0005634 // nucleus // inferred from electronic annotation /// 0005737 // cytoplasm // inferred from electronic annotation /// 0005768 // endosome // inferred from electronic annotation /// 0005768 // endosome // traceable author statement /// 0005769 // early endosome // inferred from electronic annotation /// 0005783 // endoplasmic reticulum // inferred from electronic annotation /// 0005819 // …	0004721 // phosphoprotein phosphatase activity // inferred from electronic annotation /// 0004725 // protein tyrosine phosphatase activity // inferred from electronic annotation /// 0004727 // prenylated protein tyrosine phosphatase activity // traceable author statement /// 0016787 // hydrolase activity // inferred from electronic annotation /// 0016791 // phosphatase activity // inferred from e…	protein tyrosine phosphatase 4a1
1418595_at	1.67864	up	S3-12	57435		0005737 // cytoplasm // inferred from electronic annotation /// 0005811 // lipid particle // inferred from electronic annotation /// 0005886 // plasma membrane // inferred from direct assay /// 0005886 // plasma membrane // inferred from electronic annotation /// 0012511 // monolayer-surrounded lipid storage body // inferred from electronic annotation /// 0016020 // membrane // inferred from elec…		plasma membrane associated protein, S3-12
1452418_at	1.67634	up	1200016E24Rik	319202				RIKEN cDNA 1200016E24 gene
1439855_at	1.66989	up	Tmtc1	387314		0016020 // membrane // inferred from electronic annotation /// 0016021 // integral to membrane // inferred from electronic annotation	0005488 // binding // inferred from electronic annotation	transmembrane and tetratricopeptide repeat containing 1
1441445_at	1.66074	up	Per3	18628	0006350 // transcription // inferred from electronic annotation /// 0006355 // regulation of transcription, DNA-dependent // inferred from electronic annotation /// 0007165 // signal transduction // inferred from electronic annotation /// 0007623 // circadian rhythm // inferred from direct assay /// 0048511 // rhythmic process // inferred from electronic annotation	0005634 // nucleus // inferred from electronic annotation /// 0005737 // cytoplasm // inferred from electronic annotation	0004871 // signal transducer activity // inferred from electronic annotation	period homolog 3 (Drosophila)
1419040_at	1.6595	up	Cyp2d22	56448	0010033 // response to organic substance // inferred from electronic annotation /// 0017144 // drug metabolic process // inferred from electronic annotation /// 0019369 // arachidonic acid metabolic process // inferred from electronic annotation /// 0042417 // dopamine metabolic process // inferred from electronic annotation /// 0055114 // oxidation reduction // inferred from electronic annotation	0005737 // cytoplasm // inferred from direct assay /// 0005783 // endoplasmic reticulum // inferred from electronic annotation /// 0005789 // endoplasmic reticulum membrane // inferred from electronic annotation /// 0005792 // microsome // inferred from electronic annotation /// 0016020 // membrane // inferred from electronic annotation	0004497 // monooxygenase activity // inferred from electronic annotation /// 0004509 // steroid 21-monooxygenase activity // inferred from electronic annotation /// 0005506 // iron ion binding // inferred from electronic annotation /// 0008391 // arachidonic acid monooxygenase activity // inferred from electronic annotation /// 0009055 // electron carrier activity // inferred from electronic anno…	cytochrome P450, family 2, subfamily d, polypeptide 22
1439293_at	1.65183	up	BC031353	235493				cDNA sequence BC031353
1452264_at	1.64761	up	Tenc1	209039	0001822 // kidney development // inferred from mutant phenotype /// 0007242 // intracellular signaling cascade // inferred from electronic annotation /// 0014850 // response to muscle activity // inferred from mutant phenotype /// 0019725 // cellular homeostasis // inferred from mutant phenotype /// 0032963 // collagen metabolic process // inferred from mutant phenotype /// 0035264 // multicellul…	0005886 // plasma membrane // inferred from electronic annotation /// 0016020 // membrane // inferred from electronic annotation /// 0030054 // cell junction // inferred from electronic annotation	0004721 // phosphoprotein phosphatase activity // inferred from electronic annotation /// 0005102 // receptor binding // not recorded /// 0005515 // protein binding // inferred from electronic annotation /// 0008270 // zinc ion binding // inferred from electronic annotation /// 0016787 // hydrolase activity // inferred from electronic annotation /// 0019901 // protein kinase binding // not record…	tensin like C1 domain-containing phosphatase
1424988_at	1.64621	up	Mylip	218203	0006928 // cell motion // inferred from electronic annotation /// 0007399 // nervous system development // inferred from electronic annotation /// 0016567 // protein ubiquitination // inferred from electronic annotation /// 0019941 // modification-dependent protein catabolic process // inferred from electronic annotation	0005622 // intracellular // inferred from electronic annotation /// 0005737 // cytoplasm // inferred from electronic annotation /// 0005856 // cytoskeleton // inferred from electronic annotation /// 0019898 // extrinsic to membrane // inferred from electronic annotation	0004842 // ubiquitin-protein ligase activity // inferred from electronic annotation /// 0005488 // binding // inferred from electronic annotation /// 0005515 // protein binding // inferred from electronic annotation /// 0008092 // cytoskeletal protein binding // inferred from electronic annotation /// 0008270 // zinc ion binding // inferred from electronic annotation /// 0016874 // ligase activit…	myosin regulatory light chain interacting protein
1458701_at	1.64584	up	Prei4	74182	0005975 // carbohydrate metabolic process // inferred from electronic annotation /// 0006071 // glycerol metabolic process // inferred from electronic annotation /// 0006629 // lipid metabolic process // inferred from electronic annotation		0003824 // catalytic activity // inferred from electronic annotation /// 0008081 // phosphoric diester hydrolase activity // inferred from electronic annotation /// 0008889 // glycerophosphodiester phosphodiesterase activity // inferred from electronic annotation /// 0016787 // hydrolase activity // inferred from electronic annotation /// 0030246 // carbohydrate binding // inferred from electroni…	preimplantation protein 4
1428731_at	1.64543	up	Usp54	78787	0006511 // ubiquitin-dependent protein catabolic process // inferred from electronic annotation /// 0006810 // transport // inferred from electronic annotation	0016020 // membrane // inferred from electronic annotation	0004221 // ubiquitin thiolesterase activity // inferred from electronic annotation /// 0005215 // transporter activity // inferred from electronic annotation	ubiquitin specific peptidase 54
1434976_x_at	1.64077	up	Eif4ebp1	13685	0006417 // regulation of translation // inferred from electronic annotation /// 0006446 // regulation of translational initiation // traceable author statement /// 0008286 // insulin receptor signaling pathway // inferred from direct assay /// 0017148 // negative regulation of translation // inferred from electronic annotation /// 0045947 // negative regulation of translational initiation // infe…	0005737 // cytoplasm // inferred by curator	0005515 // protein binding // inferred from physical interaction /// 0005515 // protein binding // inferred from electronic annotation /// 0008190 // eukaryotic initiation factor 4E binding // inferred from physical interaction /// 0008190 // eukaryotic initiation factor 4E binding // inferred from electronic annotation /// 0030371 // translation repressor activity // traceable author statement	eukaryotic translation initiation factor 4E binding protein 1
1418003_at	1.63422	up	1190002H23Rik	66214	0007049 // cell cycle // not recorded /// 0007049 // cell cycle // inferred from electronic annotation	0005634 // nucleus // not recorded /// 0005634 // nucleus // inferred from electronic annotation /// 0005737 // cytoplasm // not recorded /// 0005737 // cytoplasm // inferred from electronic annotation /// 0005813 // centrosome // inferred from electronic annotation	0005515 // protein binding // inferred from physical interaction /// 0030295 // protein kinase activator activity // not recorded	RIKEN cDNA 1190002H23 gene
1417968_a_at	1.63241	up	Mbd1	17190	0006306 // DNA methylation // traceable author statement /// 0006350 // transcription // inferred from electronic annotation /// 0006355 // regulation of transcription, DNA-dependent // inferred from electronic annotation	0000785 // chromatin // inferred from direct assay /// 0000792 // heterochromatin // inferred from direct assay /// 0005634 // nucleus // inferred from direct assay /// 0005634 // nucleus // inferred from electronic annotation /// 0005730 // nucleolus // inferred from direct assay /// 0005737 // cytoplasm // inferred from direct assay /// 0016607 // nuclear speck // inferred from electronic annot…	0003677 // DNA binding // inferred from direct assay /// 0003677 // DNA binding // inferred from electronic annotation /// 0008270 // zinc ion binding // inferred from electronic annotation /// 0046872 // metal ion binding // inferred from electronic annotation	methyl-CpG binding domain protein 1
1428083_at	1.63098	up	2310043N10Rik	66961	0043954 // cellular component maintenance // inferred from direct assay /// 0043954 // cellular component maintenance // inferred from mutant phenotype	0042382 // paraspeckles // inferred from direct assay	0005515 // protein binding // inferred from physical interaction	RIKEN cDNA 2310043N10 gene
1434140_at	1.63013	up	Mcf2l	17207	0007242 // intracellular signaling cascade // inferred from electronic annotation /// 0007266 // Rho protein signal transduction // inferred from direct assay /// 0035023 // regulation of Rho protein signal transduction // inferred from electronic annotation	0005622 // intracellular // inferred from electronic annotation /// 0005737 // cytoplasm // inferred from electronic annotation /// 0005886 // plasma membrane // inferred from electronic annotation /// 0016020 // membrane // inferred from direct assay /// 0016020 // membrane // inferred from electronic annotation /// 0030027 // lamellipodium // inferred from direct assay	0005085 // guanyl-nucleotide exchange factor activity // inferred from electronic annotation /// 0005089 // Rho guanyl-nucleotide exchange factor activity // inferred from direct assay /// 0005089 // Rho guanyl-nucleotide exchange factor activity // inferred from electronic annotation /// 0005515 // protein binding // inferred from physical interaction /// 0005545 // phosphatidylinositol binding …	mcf.2 transforming sequence-like
1437061_at	1.6301	up	Mbd1	17190	0006306 // DNA methylation // traceable author statement /// 0006350 // transcription // inferred from electronic annotation /// 0006355 // regulation of transcription, DNA-dependent // inferred from electronic annotation	0000785 // chromatin // inferred from direct assay /// 0000792 // heterochromatin // inferred from direct assay /// 0005634 // nucleus // inferred from direct assay /// 0005634 // nucleus // inferred from electronic annotation /// 0005730 // nucleolus // inferred from direct assay /// 0005737 // cytoplasm // inferred from direct assay /// 0016607 // nuclear speck // inferred from electronic annot…	0003677 // DNA binding // inferred from direct assay /// 0003677 // DNA binding // inferred from electronic annotation /// 0008270 // zinc ion binding // inferred from electronic annotation /// 0046872 // metal ion binding // inferred from electronic annotation	methyl-CpG binding domain protein 1
1437174_at	1.62938	up	Tfdp2	211586	0006350 // transcription // inferred from electronic annotation /// 0006355 // regulation of transcription, DNA-dependent // inferred from direct assay /// 0006355 // regulation of transcription, DNA-dependent // inferred from electronic annotation /// 0007049 // cell cycle // inferred from electronic annotation	0005634 // nucleus // inferred from electronic annotation /// 0005635 // nuclear envelope // traceable author statement /// 0005667 // transcription factor complex // inferred by curator /// 0005667 // transcription factor complex // inferred from electronic annotation	0003677 // DNA binding // inferred from electronic annotation /// 0003700 // transcription factor activity // inferred from direct assay /// 0003700 // transcription factor activity // inferred from electronic annotation	transcription factor Dp 2
1417812_a_at	1.62692	up	Lamb3	16780	0007155 // cell adhesion // inferred from electronic annotation /// 0050873 // brown fat cell differentiation // inferred from direct assay	0005576 // extracellular region // inferred from electronic annotation /// 0005578 // proteinaceous extracellular matrix // inferred from electronic annotation /// 0005604 // basement membrane // inferred from direct assay /// 0005604 // basement membrane // inferred from sequence or structural similarity /// 0005604 // basement membrane // inferred from electronic annotation	0005515 // protein binding // inferred from electronic annotation	laminin, beta 3
1419039_at	1.62387	up	Cyp2d22	56448	0010033 // response to organic substance // inferred from electronic annotation /// 0017144 // drug metabolic process // inferred from electronic annotation /// 0019369 // arachidonic acid metabolic process // inferred from electronic annotation /// 0042417 // dopamine metabolic process // inferred from electronic annotation /// 0055114 // oxidation reduction // inferred from electronic annotation	0005737 // cytoplasm // inferred from direct assay /// 0005783 // endoplasmic reticulum // inferred from electronic annotation /// 0005789 // endoplasmic reticulum membrane // inferred from electronic annotation /// 0005792 // microsome // inferred from electronic annotation /// 0016020 // membrane // inferred from electronic annotation	0004497 // monooxygenase activity // inferred from electronic annotation /// 0004509 // steroid 21-monooxygenase activity // inferred from electronic annotation /// 0005506 // iron ion binding // inferred from electronic annotation /// 0008391 // arachidonic acid monooxygenase activity // inferred from electronic annotation /// 0009055 // electron carrier activity // inferred from electronic anno…	cytochrome P450, family 2, subfamily d, polypeptide 22
1427213_at	1.62091	up	Pfkfb1	18639	0006000 // fructose metabolic process // inferred from electronic annotation /// 0006003 // fructose 2,6-bisphosphate metabolic process // inferred from electronic annotation /// 0006003 // fructose 2,6-bisphosphate metabolic process // inferred from sequence or structural similarity /// 0008152 // metabolic process // inferred from electronic annotation	0043540 // 6-phosphofructo-2-kinase/fructose-2,6-biphosphatase 1 complex // inferred from sequence or structural similarity	0000166 // nucleotide binding // inferred from electronic annotation /// 0003824 // catalytic activity // inferred from electronic annotation /// 0003873 // 6-phosphofructo-2-kinase activity // inferred from electronic annotation /// 0004331 // fructose-2,6-bisphosphate 2-phosphatase activity // inferred from electronic annotation /// 0004331 // fructose-2,6-bisphosphate 2-phosphatase activity //…	6-phosphofructo-2-kinase/fructose-2,6-biphosphatase 1
1425515_at	1.62021	up	Pik3r1	18708	0001953 // negative regulation of cell-matrix adhesion // inferred from genetic interaction /// 0006468 // protein amino acid phosphorylation // inferred from direct assay /// 0007165 // signal transduction // inferred from electronic annotation /// 0008286 // insulin receptor signaling pathway // inferred from electronic annotation /// 0008286 // insulin receptor signaling pathway // inferred fr…	0005622 // intracellular // inferred from electronic annotation /// 0005737 // cytoplasm // inferred from direct assay /// 0005737 // cytoplasm // inferred from electronic annotation /// 0005829 // cytosol // inferred from direct assay /// 0005942 // phosphoinositide 3-kinase complex // traceable author statement /// 0005942 // phosphoinositide 3-kinase complex // inferred from electronic annotat…	0005158 // insulin receptor binding // inferred from electronic annotation /// 0005158 // insulin receptor binding // inferred from sequence or structural similarity /// 0005159 // insulin-like growth factor receptor binding // inferred from electronic annotation /// 0005159 // insulin-like growth factor receptor binding // inferred from sequence or structural similarity /// 0005515 // protein bi…	phosphatidylinositol 3-kinase, regulatory subunit, polypeptide 1 (p85 alpha)
1426383_at	1.61974	up	Cry2	12953	0006281 // DNA repair // inferred from electronic annotation /// 0006350 // transcription // inferred from electronic annotation /// 0006355 // regulation of transcription, DNA-dependent // inferred from electronic annotation /// 0006606 // protein import into nucleus // inferred from physical interaction /// 0007623 // circadian rhythm // inferred from mutant phenotype /// 0018298 // protein-chr…	0005634 // nucleus // inferred from direct assay /// 0005634 // nucleus // inferred from electronic annotation /// 0005737 // cytoplasm // inferred from electronic annotation	0000166 // nucleotide binding // inferred from electronic annotation /// 0003913 // DNA photolyase activity // inferred from electronic annotation /// 0004872 // receptor activity // inferred from electronic annotation /// 0005515 // protein binding // inferred from physical interaction /// 0009881 // photoreceptor activity // inferred from electronic annotation /// 0016829 // lyase activity // i…	cryptochrome 2 (photolyase-like)
1439098_at	1.61802	up	E230013L22Rik	102132				RIKEN cDNA E230013L22 gene
1449773_s_at	1.61769	up	Gadd45b	17873	0000186 // activation of MAPKK activity // inferred from direct assay /// 0006469 // negative regulation of protein kinase activity // inferred from direct assay /// 0006915 // apoptosis // inferred from electronic annotation /// 0007275 // multicellular organismal development // inferred from electronic annotation /// 0030154 // cell differentiation // inferred from electronic annotation /// 005…	0005634 // nucleus // traceable author statement	0005515 // protein binding // inferred from physical interaction	growth arrest and DNA-damage-inducible 45 beta
1437128_a_at	1.61611	up	A630033E08Rik	240041	0006350 // transcription // inferred from electronic annotation /// 0006355 // regulation of transcription, DNA-dependent // inferred from electronic annotation	0005622 // intracellular // inferred from electronic annotation /// 0005634 // nucleus // inferred from electronic annotation	0003676 // nucleic acid binding // inferred from electronic annotation /// 0008270 // zinc ion binding // inferred from electronic annotation /// 0046872 // metal ion binding // inferred from electronic annotation	RIKEN cDNA A630033E08 gene
1421078_at	1.61277	up	Tcf23	69852	0007275 // multicellular organismal development // inferred from electronic annotation /// 0007517 // muscle organ development // inferred from electronic annotation /// 0007519 // skeletal muscle tissue development // inferred from electronic annotation /// 0030154 // cell differentiation // inferred from electronic annotation /// 0045449 // regulation of transcription // inferred from electroni…	0005634 // nucleus // inferred from electronic annotation	0030528 // transcription regulator activity // inferred from electronic annotation	transcription factor 23
1419149_at	1.61213	up	Serpine1	18787	0042127 // regulation of cell proliferation // inferred from genetic interaction /// 0045765 // regulation of angiogenesis // inferred from direct assay	0005576 // extracellular region // inferred from electronic annotation	0002020 // protease binding // inferred from electronic annotation /// 0004252 // serine-type endopeptidase activity // inferred from electronic annotation /// 0004866 // endopeptidase inhibitor activity // inferred from electronic annotation /// 0004867 // serine-type endopeptidase inhibitor activity // inferred from direct assay /// 0004867 // serine-type endopeptidase inhibitor activity // inf…	serine (or cysteine) peptidase inhibitor, clade E, member 1
1426236_a_at	1.61086	up	Glul	14645	0006542 // glutamine biosynthetic process // inferred from electronic annotation /// 0006807 // nitrogen compound metabolic process // inferred from electronic annotation /// 0009749 // response to glucose stimulus // inferred from mutant phenotype	0005622 // intracellular // inferred from direct assay /// 0005737 // cytoplasm // inferred from electronic annotation /// 0005739 // mitochondrion // inferred from direct assay /// 0005794 // Golgi apparatus // inferred from electronic annotation	0000166 // nucleotide binding // inferred from electronic annotation /// 0003824 // catalytic activity // inferred from electronic annotation /// 0004356 // glutamate-ammonia ligase activity // inferred from electronic annotation /// 0005524 // ATP binding // inferred from electronic annotation /// 0016874 // ligase activity // inferred from electronic annotation	glutamate-ammonia ligase (glutamine synthetase)
1435207_at	1.60721	up	Dixdc1	330938	0007275 // multicellular organismal development // inferred from electronic annotation /// 0016055 // Wnt receptor signaling pathway // inferred from electronic annotation	0005622 // intracellular // inferred from electronic annotation /// 0005737 // cytoplasm // inferred from electronic annotation /// 0030054 // cell junction // inferred from electronic annotation	0003779 // actin binding // inferred from electronic annotation /// 0004871 // signal transducer activity // inferred from electronic annotation	DIX domain containing 1
1451382_at	1.60521	up	Chac1	69065				ChaC, cation transport regulator-like 1 (E. coli)
1439476_at	1.60426	up	Dsg2	13511	0007155 // cell adhesion // inferred from electronic annotation /// 0007156 // homophilic cell adhesion // inferred from electronic annotation	0005886 // plasma membrane // inferred from electronic annotation /// 0016020 // membrane // inferred from electronic annotation /// 0016021 // integral to membrane // inferred from electronic annotation /// 0030054 // cell junction // inferred from electronic annotation /// 0030057 // desmosome // inferred from direct assay /// 0031965 // nuclear membrane // inferred from electronic annotation	0005509 // calcium ion binding // inferred from electronic annotation /// 0005515 // protein binding // inferred from electronic annotation	desmoglein 2
1435119_at	1.60061	up
1429588_at	1.60029	up	2810474O19Rik	67246				RIKEN cDNA 2810474O19 gene
1438511_a_at	1.5962	up	1190002H23Rik	66214	0007049 // cell cycle // not recorded /// 0007049 // cell cycle // inferred from electronic annotation	0005634 // nucleus // not recorded /// 0005634 // nucleus // inferred from electronic annotation /// 0005737 // cytoplasm // not recorded /// 0005737 // cytoplasm // inferred from electronic annotation /// 0005813 // centrosome // inferred from electronic annotation	0005515 // protein binding // inferred from physical interaction /// 0030295 // protein kinase activator activity // not recorded	RIKEN cDNA 1190002H23 gene
1433148_at	1.59467	up	4930513N20Rik	75108				RIKEN cDNA 4930513N20 gene
1436964_at	1.59224	up	D7Ertd715e	52480				DNA segment, Chr 7, ERATO Doi 715, expressed
1444399_at	1.59117	up
1424683_at	1.59006	up	Fam134b	66270		0016020 // membrane // inferred from electronic annotation /// 0016021 // integral to membrane // inferred from electronic annotation		family with sequence similarity 134, member B
1446567_at	1.58744	up
1427029_at	1.58715	up	Htra3	78558	0001558 // regulation of cell growth // inferred from electronic annotation /// 0006508 // proteolysis // inferred from electronic annotation	0005576 // extracellular region // inferred from electronic annotation	0003824 // catalytic activity // inferred from electronic annotation /// 0004252 // serine-type endopeptidase activity // inferred from electronic annotation /// 0005515 // protein binding // inferred from electronic annotation /// 0005520 // insulin-like growth factor binding // inferred from electronic annotation /// 0008233 // peptidase activity // inferred from electronic annotation /// 00082…	HtrA serine peptidase 3
1416225_at	1.5867	up	Adh1	11522	0001523 // retinoid metabolic process // inferred from mutant phenotype /// 0006068 // ethanol catabolic process // inferred from direct assay /// 0006068 // ethanol catabolic process // inferred from mutant phenotype /// 0008152 // metabolic process // inferred from electronic annotation /// 0032526 // response to retinoic acid // inferred from direct assay /// 0033574 // response to testosteron…	0005622 // intracellular // inferred from direct assay /// 0005737 // cytoplasm // inferred from electronic annotation /// 0005739 // mitochondrion // inferred from direct assay	0003824 // catalytic activity // inferred from electronic annotation /// 0004022 // alcohol dehydrogenase activity // inferred from direct assay /// 0004022 // alcohol dehydrogenase activity // traceable author statement /// 0004022 // alcohol dehydrogenase activity // inferred from electronic annotation /// 0005488 // binding // inferred from electronic annotation /// 0008270 // zinc ion binding…	alcohol dehydrogenase 1 (class I)
1455565_at	1.58582	up	Bcl9	77578	0016055 // Wnt receptor signaling pathway // inferred from electronic annotation	0005634 // nucleus // inferred from electronic annotation	0005515 // protein binding // inferred from electronic annotation	B-cell CLL/lymphoma 9
1419088_at	1.5818	up	Timp3	21859	0007169 // transmembrane receptor protein tyrosine kinase signaling pathway // non-traceable author statement /// 0014070 // response to organic cyclic substance // inferred from electronic annotation /// 0042246 // tissue regeneration // inferred from electronic annotation /// 0043627 // response to estrogen stimulus // inferred from electronic annotation	0005576 // extracellular region // inferred from electronic annotation /// 0005578 // proteinaceous extracellular matrix // inferred from electronic annotation /// 0005604 // basement membrane // inferred from direct assay	0004857 // enzyme inhibitor activity // inferred from electronic annotation /// 0005515 // protein binding // inferred from electronic annotation /// 0008191 // metalloendopeptidase inhibitor activity // inferred from electronic annotation	tissue inhibitor of metalloproteinase 3
1455150_at	1.58164	up	Hecw2	329152	0006464 // protein modification process // inferred from electronic annotation /// 0019941 // modification-dependent protein catabolic process // inferred from electronic annotation	0005622 // intracellular // inferred from electronic annotation /// 0005737 // cytoplasm // inferred from electronic annotation	0005515 // protein binding // inferred from electronic annotation /// 0016874 // ligase activity // inferred from electronic annotation /// 0016881 // acid-amino acid ligase activity // inferred from electronic annotation	HECT, C2 and WW domain containing E3 ubiquitin protein ligase 2
1417765_a_at	1.58097	up	Amy1	11722	0005975 // carbohydrate metabolic process // inferred from electronic annotation /// 0008152 // metabolic process // inferred from electronic annotation	0005576 // extracellular region // inferred from electronic annotation /// 0005615 // extracellular space // inferred from direct assay /// 0005615 // extracellular space // inferred from electronic annotation	0003824 // catalytic activity // inferred from electronic annotation /// 0004556 // alpha-amylase activity // inferred from electronic annotation /// 0005509 // calcium ion binding // inferred from electronic annotation /// 0016160 // amylase activity // inferred from direct assay /// 0016787 // hydrolase activity // inferred from electronic annotation /// 0016798 // hydrolase activity, acting on…	amylase 1, salivary
1457350_at	1.57508	up	Per2	18627	0006350 // transcription // inferred from electronic annotation /// 0006355 // regulation of transcription, DNA-dependent // inferred from electronic annotation /// 0007165 // signal transduction // inferred from electronic annotation /// 0007623 // circadian rhythm // inferred from direct assay /// 0048511 // rhythmic process // inferred from electronic annotation	0005634 // nucleus // inferred from physical interaction /// 0005634 // nucleus // inferred from electronic annotation /// 0005737 // cytoplasm // inferred from direct assay /// 0005737 // cytoplasm // inferred from electronic annotation	0004871 // signal transducer activity // inferred from electronic annotation /// 0005515 // protein binding // inferred from physical interaction	period homolog 2 (Drosophila)
1437136_at	1.57447	up	5830436I19Rik	319946				RIKEN cDNA 5830436I19 gene
1455345_at	1.57406	up	Phf15	76901			0005515 // protein binding // inferred from electronic annotation /// 0008270 // zinc ion binding // inferred from electronic annotation /// 0046872 // metal ion binding // inferred from electronic annotation	PHD finger protein 15
1420887_a_at	1.57151	up	Bcl2l1	12048	0001541 // ovarian follicle development // inferred from genetic interaction /// 0001541 // ovarian follicle development // inferred from mutant phenotype /// 0001701 // in utero embryonic development // inferred from mutant phenotype /// 0001836 // release of cytochrome c from mitochondria // inferred from genetic interaction /// 0006915 // apoptosis // inferred from direct assay /// 0006915 // …	0005622 // intracellular // inferred from direct assay /// 0005737 // cytoplasm // inferred from electronic annotation /// 0005739 // mitochondrion // inferred from direct assay /// 0005739 // mitochondrion // inferred from electronic annotation /// 0005741 // mitochondrial outer membrane // not recorded /// 0005829 // cytosol // inferred from direct assay /// 0016020 // membrane // inferred from…	0005515 // protein binding // inferred from physical interaction /// 0046982 // protein heterodimerization activity // inferred from physical interaction	BCL2-like 1
1453238_s_at	1.57029	up	1200016E24Rik /// 3930401B19Rik /// A130040M12Rik /// E430024C06Rik	319202 /// 319269 /// 319443 /// 77570				RIKEN cDNA 1200016E24 gene /// RIKEN cDNA 3930401B19 gene /// RIKEN cDNA A130040M12 gene /// RIKEN cDNA E430024C06 gene
1427045_at	1.56713	up	Synpo	104027	0030865 // cortical cytoskeleton organization // non-traceable author statement	0005737 // cytoplasm // inferred from electronic annotation /// 0005856 // cytoskeleton // inferred from electronic annotation /// 0005886 // plasma membrane // inferred from electronic annotation /// 0005923 // tight junction // inferred from electronic annotation /// 0015629 // actin cytoskeleton // inferred from direct assay /// 0016020 // membrane // inferred from electronic annotation /// 00…	0003779 // actin binding // inferred from direct assay /// 0003779 // actin binding // inferred from electronic annotation	synaptopodin
1451756_at	1.56596	up	Flt1	14254	0001525 // angiogenesis // inferred from mutant phenotype /// 0001525 // angiogenesis // inferred from electronic annotation /// 0001569 // patterning of blood vessels // inferred from mutant phenotype /// 0006468 // protein amino acid phosphorylation // inferred from electronic annotation /// 0007169 // transmembrane receptor protein tyrosine kinase signaling pathway // inferred from electronic …	0016020 // membrane // inferred from electronic annotation /// 0016021 // integral to membrane // inferred from electronic annotation	0000166 // nucleotide binding // inferred from electronic annotation /// 0004672 // protein kinase activity // inferred from electronic annotation /// 0004713 // protein tyrosine kinase activity // inferred from electronic annotation /// 0004714 // transmembrane receptor protein tyrosine kinase activity // inferred from electronic annotation /// 0004872 // receptor activity // inferred from elect…	FMS-like tyrosine kinase 1
1451932_a_at	1.56551	up	Adamtsl4	229595	0006915 // apoptosis // inferred from electronic annotation /// 0030198 // extracellular matrix organization // inferred from direct assay /// 0043065 // positive regulation of apoptosis // inferred from sequence or structural similarity	0005576 // extracellular region // inferred from electronic annotation /// 0005614 // interstitial matrix // inferred from direct assay /// 0005737 // cytoplasm // inferred from electronic annotation /// 0005886 // plasma membrane // inferred from electronic annotation /// 0031012 // extracellular matrix // inferred from direct assay /// 0031012 // extracellular matrix // inferred from electronic…	0002020 // protease binding // inferred from sequence or structural similarity /// 0004222 // metalloendopeptidase activity // inferred from electronic annotation /// 0008233 // peptidase activity // inferred from electronic annotation	ADAMTS-like 4
1422820_at	1.56389	up	Lipe	16890	0006361 // transcription initiation from RNA polymerase I promoter // inferred from sequence or structural similarity /// 0006629 // lipid metabolic process // inferred from electronic annotation /// 0008152 // metabolic process // inferred from electronic annotation /// 0008202 // steroid metabolic process // inferred from electronic annotation /// 0008203 // cholesterol metabolic process // inf…	0005634 // nucleus // inferred from sequence or structural similarity /// 0005737 // cytoplasm // inferred from sequence or structural similarity /// 0005737 // cytoplasm // inferred from electronic annotation /// 0005739 // mitochondrion // inferred from sequence or structural similarity /// 0005829 // cytosol // inferred from direct assay /// 0005886 // plasma membrane // inferred from electron…	0003716 // RNA polymerase I transcription termination factor activity // inferred from sequence or structural similarity /// 0004806 // triacylglycerol lipase activity // inferred from mutant phenotype /// 0005515 // protein binding // inferred from sequence or structural similarity /// 0005515 // protein binding // inferred from electronic annotation /// 0016298 // lipase activity // inferred fr…	lipase, hormone sensitive
1449731_s_at	1.5608	up	Nfkbia	18035	0000060 // protein import into nucleus, translocation // inferred from direct assay /// 0031663 // lipopolysaccharide-mediated signaling pathway // inferred from direct assay /// 0032495 // response to muramyl dipeptide // inferred from direct assay /// 0032496 // response to lipopolysaccharide // inferred from direct assay /// 0034142 // toll-like receptor 4 signaling pathway // inferred from di…	0005634 // nucleus // inferred from direct assay /// 0005634 // nucleus // inferred from electronic annotation /// 0005737 // cytoplasm // inferred from direct assay /// 0005737 // cytoplasm // inferred from electronic annotation /// 0005829 // cytosol // inferred from direct assay	0005515 // protein binding // inferred from physical interaction /// 0008139 // nuclear localization sequence binding // inferred from electronic annotation /// 0031625 // ubiquitin protein ligase binding // inferred from electronic annotation /// 0042802 // identical protein binding // inferred from electronic annotation /// 0051059 // NF-kappaB binding // inferred from electronic annotation	nuclear factor of kappa light polypeptide gene enhancer in B-cells inhibitor, alpha
1428142_at	1.55866	up	Etv5	104156	0006355 // regulation of transcription, DNA-dependent // inferred from electronic annotation /// 0009887 // organ morphogenesis // inferred from direct assay /// 0045941 // positive regulation of transcription // inferred from direct assay	0005634 // nucleus // inferred by curator /// 0005634 // nucleus // inferred from electronic annotation	0003677 // DNA binding // inferred from electronic annotation /// 0003700 // transcription factor activity // inferred from electronic annotation /// 0016563 // transcription activator activity // inferred from direct assay /// 0043565 // sequence-specific DNA binding // inferred from electronic annotation	ets variant gene 5
1418701_at	1.55802	up	Comt1	12846	0006584 // catecholamine metabolic process // inferred from electronic annotation /// 0042135 // neurotransmitter catabolic process // inferred from electronic annotation /// 0042420 // dopamine catabolic process // inferred from direct assay	0005737 // cytoplasm // inferred from electronic annotation /// 0005886 // plasma membrane // inferred from electronic annotation /// 0016020 // membrane // inferred from electronic annotation /// 0016021 // integral to membrane // inferred from electronic annotation /// 0043231 // intracellular membrane-bounded organelle // inferred from electronic annotation	0000287 // magnesium ion binding // inferred from electronic annotation /// 0005515 // protein binding // inferred from electronic annotation /// 0008168 // methyltransferase activity // inferred from electronic annotation /// 0008171 // O-methyltransferase activity // inferred from electronic annotation /// 0016206 // catechol O-methyltransferase activity // inferred from electronic annotation /…	catechol-O-methyltransferase 1
1417562_at	1.55772	up	Eif4ebp1	13685	0006417 // regulation of translation // inferred from electronic annotation /// 0006446 // regulation of translational initiation // traceable author statement /// 0008286 // insulin receptor signaling pathway // inferred from direct assay /// 0017148 // negative regulation of translation // inferred from electronic annotation /// 0045947 // negative regulation of translational initiation // infe…	0005737 // cytoplasm // inferred by curator	0005515 // protein binding // inferred from physical interaction /// 0005515 // protein binding // inferred from electronic annotation /// 0008190 // eukaryotic initiation factor 4E binding // inferred from physical interaction /// 0008190 // eukaryotic initiation factor 4E binding // inferred from electronic annotation /// 0030371 // translation repressor activity // traceable author statement	eukaryotic translation initiation factor 4E binding protein 1
1440311_at	1.5577	up	Sorbs1	20411	0006810 // transport // inferred from electronic annotation /// 0008286 // insulin receptor signaling pathway // inferred from direct assay /// 0008286 // insulin receptor signaling pathway // inferred by curator /// 0015758 // glucose transport // inferred from direct assay /// 0032869 // cellular response to insulin stimulus // inferred by curator /// 0032869 // cellular response to insulin sti…	0001725 // stress fiber // inferred from direct assay /// 0005634 // nucleus // inferred from sequence or structural similarity /// 0005737 // cytoplasm // inferred from electronic annotation /// 0005829 // cytosol // inferred from direct assay /// 0005856 // cytoskeleton // inferred from electronic annotation /// 0005886 // plasma membrane // inferred from electronic annotation /// 0005913 // ce…	0005070 // SH3/SH2 adaptor activity // inferred from physical interaction /// 0005158 // insulin receptor binding // inferred from direct assay /// 0005158 // insulin receptor binding // inferred from physical interaction /// 0005515 // protein binding // inferred from physical interaction /// 0019901 // protein kinase binding // inferred from direct assay	sorbin and SH3 domain containing 1
1455377_at	1.55614	up	Ttll7	70892	0006464 // protein modification process // inferred from electronic annotation /// 0007275 // multicellular organismal development // inferred from electronic annotation /// 0007399 // nervous system development // inferred from electronic annotation /// 0030154 // cell differentiation // inferred from electronic annotation	0005929 // cilium // inferred from electronic annotation /// 0042995 // cell projection // inferred from electronic annotation /// 0043204 // perikaryon // inferred from electronic annotation	0004835 // tubulin-tyrosine ligase activity // inferred from electronic annotation /// 0016874 // ligase activity // inferred from electronic annotation	tubulin tyrosine ligase-like family, member 7
1439087_a_at	1.55402	up	Pik3ip1	216505		0016020 // membrane // inferred from electronic annotation /// 0016021 // integral to membrane // inferred from electronic annotation		phosphoinositide-3-kinase interacting protein 1
1449533_at	1.55224	up	Tmem100	67888		0016020 // membrane // inferred from electronic annotation /// 0016021 // integral to membrane // inferred from electronic annotation		transmembrane protein 100
1450082_s_at	1.55021	up	Etv5	104156	0006355 // regulation of transcription, DNA-dependent // inferred from electronic annotation /// 0009887 // organ morphogenesis // inferred from direct assay /// 0045941 // positive regulation of transcription // inferred from direct assay	0005634 // nucleus // inferred by curator /// 0005634 // nucleus // inferred from electronic annotation	0003677 // DNA binding // inferred from electronic annotation /// 0003700 // transcription factor activity // inferred from electronic annotation /// 0016563 // transcription activator activity // inferred from direct assay /// 0043565 // sequence-specific DNA binding // inferred from electronic annotation	ets variant gene 5
1422997_s_at	1.54912	up	Acot1 /// Acot2 /// LOC100044830	100044830 /// 171210 /// 26897	0001666 // response to hypoxia // inferred from electronic annotation /// 0001676 // long-chain fatty acid metabolic process // inferred from direct assay /// 0006629 // lipid metabolic process // inferred from electronic annotation /// 0006637 // acyl-CoA metabolic process // traceable author statement /// 0006637 // acyl-CoA metabolic process // inferred from electronic annotation	0005737 // cytoplasm // traceable author statement /// 0005737 // cytoplasm // inferred from electronic annotation /// 0005739 // mitochondrion // inferred from direct assay /// 0005739 // mitochondrion // traceable author statement /// 0005739 // mitochondrion // inferred from electronic annotation /// 0005759 // mitochondrial matrix // inferred from electronic annotation	0004091 // carboxylesterase activity // inferred from electronic annotation /// 0016290 // palmitoyl-CoA hydrolase activity // inferred from electronic annotation /// 0016291 // acyl-CoA thioesterase activity // inferred from direct assay /// 0016291 // acyl-CoA thioesterase activity // traceable author statement /// 0016787 // hydrolase activity // inferred from electronic annotation /// 0016790…	acyl-CoA thioesterase 1 /// acyl-CoA thioesterase 2 /// similar to acyl-CoA thioesterase
1438682_at	1.54848	up	Pik3r1	18708	0001953 // negative regulation of cell-matrix adhesion // inferred from genetic interaction /// 0006468 // protein amino acid phosphorylation // inferred from direct assay /// 0007165 // signal transduction // inferred from electronic annotation /// 0008286 // insulin receptor signaling pathway // inferred from electronic annotation /// 0008286 // insulin receptor signaling pathway // inferred fr…	0005622 // intracellular // inferred from electronic annotation /// 0005737 // cytoplasm // inferred from direct assay /// 0005737 // cytoplasm // inferred from electronic annotation /// 0005829 // cytosol // inferred from direct assay /// 0005942 // phosphoinositide 3-kinase complex // traceable author statement /// 0005942 // phosphoinositide 3-kinase complex // inferred from electronic annotat…	0005158 // insulin receptor binding // inferred from electronic annotation /// 0005158 // insulin receptor binding // inferred from sequence or structural similarity /// 0005159 // insulin-like growth factor receptor binding // inferred from electronic annotation /// 0005159 // insulin-like growth factor receptor binding // inferred from sequence or structural similarity /// 0005515 // protein bi…	phosphatidylinositol 3-kinase, regulatory subunit, polypeptide 1 (p85 alpha)
1434010_at	1.5479	up	Fam117b	72750				family with sequence similarity 117, member B
1422264_s_at	1.54725	up	Klf9	16601	0006350 // transcription // inferred from electronic annotation /// 0006355 // regulation of transcription, DNA-dependent // inferred from electronic annotation /// 0007566 // embryo implantation // inferred from direct assay /// 0045449 // regulation of transcription // inferred from direct assay /// 0050847 // progesterone receptor signaling pathway // inferred from direct assay	0005622 // intracellular // inferred from electronic annotation /// 0005634 // nucleus // inferred from direct assay /// 0005634 // nucleus // inferred from electronic annotation	0003676 // nucleic acid binding // inferred from electronic annotation /// 0003677 // DNA binding // inferred from sequence or structural similarity /// 0003677 // DNA binding // inferred from electronic annotation /// 0008270 // zinc ion binding // inferred from electronic annotation /// 0030528 // transcription regulator activity // inferred from direct assay /// 0046872 // metal ion binding //…	Kruppel-like factor 9
1421011_at	1.5432	up	Hsd17b11	114664	0006694 // steroid biosynthetic process // inferred from electronic annotation /// 0006710 // androgen catabolic process // inferred from electronic annotation /// 0008152 // metabolic process // inferred from electronic annotation /// 0008610 // lipid biosynthetic process // inferred from electronic annotation /// 0055114 // oxidation reduction // inferred from electronic annotation	0005576 // extracellular region // inferred from electronic annotation /// 0005737 // cytoplasm // inferred from electronic annotation	0003824 // catalytic activity // inferred from electronic annotation /// 0004303 // estradiol 17-beta-dehydrogenase activity // inferred from electronic annotation /// 0005488 // binding // inferred from electronic annotation /// 0016229 // steroid dehydrogenase activity // inferred from electronic annotation /// 0016491 // oxidoreductase activity // inferred from electronic annotation	hydroxysteroid (17-beta) dehydrogenase 11
1444376_at	1.54183	up	LOC100047324 /// Sesn1	100047324 /// 140742	0007050 // cell cycle arrest // inferred from electronic annotation	0005634 // nucleus // inferred from electronic annotation		similar to Sesn1 protein /// sestrin 1
1420888_at	1.54157	up	Bcl2l1	12048	0001541 // ovarian follicle development // inferred from genetic interaction /// 0001541 // ovarian follicle development // inferred from mutant phenotype /// 0001701 // in utero embryonic development // inferred from mutant phenotype /// 0001836 // release of cytochrome c from mitochondria // inferred from genetic interaction /// 0006915 // apoptosis // inferred from direct assay /// 0006915 // …	0005622 // intracellular // inferred from direct assay /// 0005737 // cytoplasm // inferred from electronic annotation /// 0005739 // mitochondrion // inferred from direct assay /// 0005739 // mitochondrion // inferred from electronic annotation /// 0005741 // mitochondrial outer membrane // not recorded /// 0005829 // cytosol // inferred from direct assay /// 0016020 // membrane // inferred from…	0005515 // protein binding // inferred from physical interaction /// 0046982 // protein heterodimerization activity // inferred from physical interaction	BCL2-like 1
1438157_s_at	1.53972	up	Nfkbia	18035	0000060 // protein import into nucleus, translocation // inferred from direct assay /// 0031663 // lipopolysaccharide-mediated signaling pathway // inferred from direct assay /// 0032495 // response to muramyl dipeptide // inferred from direct assay /// 0032496 // response to lipopolysaccharide // inferred from direct assay /// 0034142 // toll-like receptor 4 signaling pathway // inferred from di…	0005634 // nucleus // inferred from direct assay /// 0005634 // nucleus // inferred from electronic annotation /// 0005737 // cytoplasm // inferred from direct assay /// 0005737 // cytoplasm // inferred from electronic annotation /// 0005829 // cytosol // inferred from direct assay	0005515 // protein binding // inferred from physical interaction /// 0008139 // nuclear localization sequence binding // inferred from electronic annotation /// 0031625 // ubiquitin protein ligase binding // inferred from electronic annotation /// 0042802 // identical protein binding // inferred from electronic annotation /// 0051059 // NF-kappaB binding // inferred from electronic annotation	nuclear factor of kappa light polypeptide gene enhancer in B-cells inhibitor, alpha
1417629_at	1.53886	up	Prodh	19125	0006537 // glutamate biosynthetic process // inferred from electronic annotation /// 0006560 // proline metabolic process // inferred from electronic annotation /// 0006562 // proline catabolic process // inferred from electronic annotation /// 0055114 // oxidation reduction // inferred from electronic annotation	0005739 // mitochondrion // inferred from electronic annotation /// 0005743 // mitochondrial inner membrane // inferred from direct assay /// 0005759 // mitochondrial matrix // inferred from electronic annotation	0004657 // proline dehydrogenase activity // inferred from sequence or structural similarity /// 0004657 // proline dehydrogenase activity // inferred from electronic annotation /// 0016491 // oxidoreductase activity // inferred from electronic annotation	proline dehydrogenase
1453896_at	1.53623	up	Pdzd2	68070		0030054 // cell junction // not recorded	0005515 // protein binding // not recorded /// 0005515 // protein binding // inferred from electronic annotation	PDZ domain containing 2
1435261_at	1.53171	up	Tmtc1	387314		0016020 // membrane // inferred from electronic annotation /// 0016021 // integral to membrane // inferred from electronic annotation	0005488 // binding // inferred from electronic annotation	transmembrane and tetratricopeptide repeat containing 1
1460409_at	1.53101	up	Cpt1a	12894	0006006 // glucose metabolic process // inferred from electronic annotation /// 0006629 // lipid metabolic process // inferred from electronic annotation /// 0006631 // fatty acid metabolic process // inferred from electronic annotation /// 0006810 // transport // inferred from electronic annotation /// 0042755 // eating behavior // inferred from electronic annotation /// 0050796 // regulation of…	0005739 // mitochondrion // inferred from direct assay /// 0005739 // mitochondrion // inferred from electronic annotation /// 0005741 // mitochondrial outer membrane // inferred from electronic annotation /// 0005743 // mitochondrial inner membrane // inferred from direct assay /// 0005792 // microsome // inferred from electronic annotation /// 0016020 // membrane // inferred from electronic ann…	0004095 // carnitine O-palmitoyltransferase activity // inferred from electronic annotation /// 0008415 // acyltransferase activity // inferred from electronic annotation /// 0016740 // transferase activity // inferred from electronic annotation	carnitine palmitoyltransferase 1a, liver
1446464_at	1.52946	up	Psme4	103554	0007275 // multicellular organismal development // inferred from electronic annotation /// 0007283 // spermatogenesis // inferred from electronic annotation /// 0030154 // cell differentiation // inferred from electronic annotation	0005634 // nucleus // inferred from electronic annotation /// 0005829 // cytosol // inferred from electronic annotation /// 0016607 // nuclear speck // inferred from electronic annotation /// 0043234 // protein complex // inferred from electronic annotation	0005488 // binding // inferred from electronic annotation	Proteasome (prosome, macropain) activator subunit 4, mRNA (cDNA clone IMAGE:4987120)
1458573_at	1.52895	up
1460499_at	1.52702	up	9230110I02Rik	77698				RIKEN cDNA 9230110I02 gene
1449740_s_at	1.52536	up	Dsg2	13511	0007155 // cell adhesion // inferred from electronic annotation /// 0007156 // homophilic cell adhesion // inferred from electronic annotation	0005886 // plasma membrane // inferred from electronic annotation /// 0016020 // membrane // inferred from electronic annotation /// 0016021 // integral to membrane // inferred from electronic annotation /// 0030054 // cell junction // inferred from electronic annotation /// 0030057 // desmosome // inferred from direct assay /// 0031965 // nuclear membrane // inferred from electronic annotation	0005509 // calcium ion binding // inferred from electronic annotation /// 0005515 // protein binding // inferred from electronic annotation	desmoglein 2
1438186_at	1.52411	up
1452777_a_at	1.52238	up	Nub1	53312		0005634 // nucleus // inferred from electronic annotation	0005488 // binding // inferred from electronic annotation	negative regulator of ubiquitin-like proteins 1
1417092_at	1.52187	up	Pth1r	19228	0001501 // skeletal system development // inferred from mutant phenotype /// 0001503 // ossification // inferred from mutant phenotype /// 0002062 // chondrocyte differentiation // inferred from genetic interaction /// 0002062 // chondrocyte differentiation // inferred from mutant phenotype /// 0002076 // osteoblast development // inferred from mutant phenotype /// 0006874 // cellular calcium ion…	0005622 // intracellular // inferred from direct assay /// 0005634 // nucleus // inferred from electronic annotation /// 0005737 // cytoplasm // inferred from electronic annotation /// 0005886 // plasma membrane // inferred from electronic annotation /// 0016020 // membrane // inferred from electronic annotation /// 0016021 // integral to membrane // inferred from electronic annotation /// 001632…	0004871 // signal transducer activity // inferred from electronic annotation /// 0004872 // receptor activity // inferred from electronic annotation /// 0004888 // transmembrane receptor activity // inferred from electronic annotation /// 0004930 // G-protein coupled receptor activity // inferred from electronic annotation /// 0004991 // parathyroid hormone receptor activity // inferred from muta…	parathyroid hormone 1 receptor
1460510_a_at	1.52184	up	Coq10b	67876		0005739 // mitochondrion // inferred from electronic annotation		coenzyme Q10 homolog B (S. cerevisiae)
1427384_at	1.52143	up	Chd6	71389	0006333 // chromatin assembly or disassembly // inferred from electronic annotation	0000785 // chromatin // inferred from electronic annotation /// 0005634 // nucleus // inferred from electronic annotation	0003676 // nucleic acid binding // inferred from electronic annotation /// 0003677 // DNA binding // inferred from electronic annotation /// 0003682 // chromatin binding // inferred from electronic annotation /// 0004386 // helicase activity // inferred from electronic annotation /// 0005524 // ATP binding // inferred from electronic annotation /// 0008026 // ATP-dependent helicase activity // in…	chromodomain helicase DNA binding protein 6
1428057_a_at	1.51447	up	Ahnak	66395		0005911 // cell-cell junction // inferred from sequence or structural similarity	0005515 // protein binding // inferred from electronic annotation	AHNAK nucleoprotein (desmoyokin)
1428143_a_at	1.51351	up	Pnpla2	66853	0006629 // lipid metabolic process // inferred from electronic annotation /// 0008152 // metabolic process // inferred from electronic annotation /// 0016042 // lipid catabolic process // inferred from electronic annotation /// 0019433 // triglyceride catabolic process // inferred from mutant phenotype	0005811 // lipid particle // inferred from electronic annotation /// 0005829 // cytosol // inferred from direct assay /// 0005886 // plasma membrane // inferred from electronic annotation /// 0016020 // membrane // inferred from electronic annotation /// 0016021 // integral to membrane // inferred from electronic annotation /// 0034430 // monolayer-surrounded lipid storage body outer lipid monola…	0004806 // triacylglycerol lipase activity // inferred from mutant phenotype /// 0004806 // triacylglycerol lipase activity // inferred from electronic annotation /// 0016787 // hydrolase activity // inferred from electronic annotation	patatin-like phospholipase domain containing 2
1419248_at	1.51249	up	Rgs2	19735	0007049 // cell cycle // inferred from electronic annotation /// 0007169 // transmembrane receptor protein tyrosine kinase signaling pathway // non-traceable author statement /// 0007186 // G-protein coupled receptor protein signaling pathway // traceable author statement /// 0007283 // spermatogenesis // inferred from reviewed computational analysis /// 0009968 // negative regulation of signal t…	0005634 // nucleus // traceable author statement	0004871 // signal transducer activity // inferred from electronic annotation /// 0005096 // GTPase activator activity // traceable author statement	regulator of G-protein signaling 2
1455002_at	1.50903	up	Ptp4a1	19243	0006470 // protein amino acid dephosphorylation // inferred from electronic annotation /// 0007049 // cell cycle // inferred from electronic annotation /// 0007275 // multicellular organismal development // inferred from electronic annotation /// 0016311 // dephosphorylation // inferred from electronic annotation /// 0030335 // positive regulation of cell migration // inferred from direct assay	0005634 // nucleus // inferred from electronic annotation /// 0005737 // cytoplasm // inferred from electronic annotation /// 0005768 // endosome // inferred from electronic annotation /// 0005768 // endosome // traceable author statement /// 0005769 // early endosome // inferred from electronic annotation /// 0005783 // endoplasmic reticulum // inferred from electronic annotation /// 0005819 // …	0004721 // phosphoprotein phosphatase activity // inferred from electronic annotation /// 0004725 // protein tyrosine phosphatase activity // inferred from electronic annotation /// 0004727 // prenylated protein tyrosine phosphatase activity // traceable author statement /// 0016787 // hydrolase activity // inferred from electronic annotation /// 0016791 // phosphatase activity // inferred from e…	protein tyrosine phosphatase 4a1
1450917_at	1.50868	up	Myom2	17930	0006936 // muscle contraction // inferred from physical interaction	0005634 // nucleus // inferred from electronic annotation /// 0005737 // cytoplasm // inferred from electronic annotation /// 0005739 // mitochondrion // inferred from electronic annotation /// 0005856 // cytoskeleton // traceable author statement	0005200 // structural constituent of cytoskeleton // traceable author statement	myomesin 2
1458383_at	1.50638	up
1420540_a_at	1.50579	up	Rit1	19769	0007264 // small GTPase mediated signal transduction // inferred from electronic annotation	0005622 // intracellular // inferred from electronic annotation /// 0005886 // plasma membrane // inferred from direct assay /// 0005886 // plasma membrane // inferred from electronic annotation /// 0016020 // membrane // inferred from electronic annotation	0000166 // nucleotide binding // inferred from electronic annotation /// 0005515 // protein binding // inferred from physical interaction /// 0005525 // GTP binding // inferred from direct assay /// 0005525 // GTP binding // inferred from electronic annotation	Ras-like without CAAX 1
1445307_at	1.50403	up
1426243_at	1.50331	up	Cth	107869	0006520 // amino acid metabolic process // inferred from electronic annotation /// 0008652 // amino acid biosynthetic process // inferred from electronic annotation /// 0019344 // cysteine biosynthetic process // inferred from electronic annotation	0005737 // cytoplasm // inferred from electronic annotation	0003824 // catalytic activity // inferred from electronic annotation /// 0004123 // cystathionine gamma-lyase activity // inferred from direct assay /// 0004123 // cystathionine gamma-lyase activity // inferred from electronic annotation /// 0016829 // lyase activity // inferred from electronic annotation /// 0030170 // pyridoxal phosphate binding // inferred from electronic annotation	cystathionase (cystathionine gamma-lyase)
1453072_at	1.50306	up	Gpr160	71862	0007165 // signal transduction // inferred from electronic annotation /// 0007186 // G-protein coupled receptor protein signaling pathway // inferred from electronic annotation	0005886 // plasma membrane // inferred from electronic annotation /// 0016020 // membrane // inferred from electronic annotation /// 0016021 // integral to membrane // inferred from electronic annotation	0004871 // signal transducer activity // inferred from electronic annotation /// 0004872 // receptor activity // inferred from electronic annotation /// 0004930 // G-protein coupled receptor activity // inferred from electronic annotation	G protein-coupled receptor 160
1454699_at	1.50246	up	LOC100047324 /// Sesn1	100047324 /// 140742	0007050 // cell cycle arrest // inferred from electronic annotation	0005634 // nucleus // inferred from electronic annotation		similar to Sesn1 protein /// sestrin 1
1451737_at	1.50024	up	Pik3r1	18708	0001953 // negative regulation of cell-matrix adhesion // inferred from genetic interaction /// 0006468 // protein amino acid phosphorylation // inferred from direct assay /// 0007165 // signal transduction // inferred from electronic annotation /// 0008286 // insulin receptor signaling pathway // inferred from electronic annotation /// 0008286 // insulin receptor signaling pathway // inferred fr…	0005622 // intracellular // inferred from electronic annotation /// 0005737 // cytoplasm // inferred from direct assay /// 0005737 // cytoplasm // inferred from electronic annotation /// 0005829 // cytosol // inferred from direct assay /// 0005942 // phosphoinositide 3-kinase complex // traceable author statement /// 0005942 // phosphoinositide 3-kinase complex // inferred from electronic annotat…	0005158 // insulin receptor binding // inferred from electronic annotation /// 0005158 // insulin receptor binding // inferred from sequence or structural similarity /// 0005159 // insulin-like growth factor receptor binding // inferred from electronic annotation /// 0005159 // insulin-like growth factor receptor binding // inferred from sequence or structural similarity /// 0005515 // protein bi…	phosphatidylinositol 3-kinase, regulatory subunit, polypeptide 1 (p85 alpha)
1417309_at	1.4997	up	Tob2	57259	0010468 // regulation of gene expression // inferred from mutant phenotype /// 0045671 // negative regulation of osteoclast differentiation // inferred from mutant phenotype /// 0045778 // positive regulation of ossification // inferred from mutant phenotype		0042809 // vitamin D receptor binding // inferred from physical interaction	transducer of ERBB2, 2
1433761_at	1.49859	up	Pde4dip	83679		0005634 // nucleus // inferred from electronic annotation /// 0005737 // cytoplasm // inferred from electronic annotation /// 0005794 // Golgi apparatus // inferred from electronic annotation /// 0005813 // centrosome // inferred from electronic annotation	0005515 // protein binding // inferred from physical interaction	phosphodiesterase 4D interacting protein (myomegalin)
1423233_at	1.49582	up	Cebpd	12609	0006350 // transcription // inferred from electronic annotation /// 0006355 // regulation of transcription, DNA-dependent // inferred from electronic annotation /// 0045944 // positive regulation of transcription from RNA polymerase II promoter // inferred from direct assay	0005634 // nucleus // inferred from direct assay /// 0005634 // nucleus // inferred from electronic annotation	0003677 // DNA binding // inferred from direct assay /// 0003677 // DNA binding // inferred from electronic annotation /// 0003700 // transcription factor activity // inferred from electronic annotation /// 0003704 // specific RNA polymerase II transcription factor activity // inferred from direct assay /// 0005515 // protein binding // inferred from physical interaction /// 0010843 // promoter b…	CCAAT/enhancer binding protein (C/EBP), delta
1444226_at	1.49479	up	Foxo3	56484	0001542 // ovulation from ovarian follicle // inferred from mutant phenotype /// 0001544 // initiation of primordial ovarian follicle growth // inferred from mutant phenotype /// 0001547 // antral ovarian follicle growth // inferred from mutant phenotype /// 0001556 // oocyte maturation // inferred from mutant phenotype /// 0006355 // regulation of transcription, DNA-dependent // inferred from di…	0005624 // membrane fraction // inferred from direct assay /// 0005634 // nucleus // inferred from direct assay /// 0005634 // nucleus // inferred from electronic annotation /// 0005737 // cytoplasm // inferred from direct assay	0003677 // DNA binding // inferred from direct assay /// 0003677 // DNA binding // inferred from electronic annotation /// 0003700 // transcription factor activity // inferred from direct assay /// 0003700 // transcription factor activity // not recorded /// 0003700 // transcription factor activity // inferred from electronic annotation /// 0016563 // transcription activator activity // inferred …	forkhead box O3
1442243_at	1.4944	up	Per3	18628	0006350 // transcription // inferred from electronic annotation /// 0006355 // regulation of transcription, DNA-dependent // inferred from electronic annotation /// 0007165 // signal transduction // inferred from electronic annotation /// 0007623 // circadian rhythm // inferred from direct assay /// 0048511 // rhythmic process // inferred from electronic annotation	0005634 // nucleus // inferred from electronic annotation /// 0005737 // cytoplasm // inferred from electronic annotation	0004871 // signal transducer activity // inferred from electronic annotation	period homolog 3 (Drosophila)
1447223_at	1.49407	up
1443715_at	1.49368	up	Rbm24	666794			0000166 // nucleotide binding // inferred from electronic annotation /// 0003676 // nucleic acid binding // inferred from electronic annotation	RNA binding motif protein 24
1426191_a_at	1.49284	up	Bcl2l1	12048	0001541 // ovarian follicle development // inferred from genetic interaction /// 0001541 // ovarian follicle development // inferred from mutant phenotype /// 0001701 // in utero embryonic development // inferred from mutant phenotype /// 0001836 // release of cytochrome c from mitochondria // inferred from genetic interaction /// 0006915 // apoptosis // inferred from direct assay /// 0006915 // …	0005622 // intracellular // inferred from direct assay /// 0005737 // cytoplasm // inferred from electronic annotation /// 0005739 // mitochondrion // inferred from direct assay /// 0005739 // mitochondrion // inferred from electronic annotation /// 0005741 // mitochondrial outer membrane // not recorded /// 0005829 // cytosol // inferred from direct assay /// 0016020 // membrane // inferred from…	0005515 // protein binding // inferred from physical interaction /// 0046982 // protein heterodimerization activity // inferred from physical interaction	BCL2-like 1
1428332_at	1.49223	up	Pik3ip1	216505		0016020 // membrane // inferred from electronic annotation /// 0016021 // integral to membrane // inferred from electronic annotation		phosphoinositide-3-kinase interacting protein 1
1456480_at	1.49089	up	Fry	320365				furry homolog (Drosophila)
1449322_at	1.49054	up	EG546482 /// EG667723 /// LOC100044642 /// OTTMUSG00000011595 /// OTTMUSG00000026290 /// Ptp4a1	100044642 /// 19243 /// 433406 /// 546482 /// 627166 /// 667723	0006470 // protein amino acid dephosphorylation // inferred from electronic annotation /// 0007049 // cell cycle // inferred from electronic annotation /// 0007275 // multicellular organismal development // inferred from electronic annotation /// 0016311 // dephosphorylation // inferred from electronic annotation /// 0030335 // positive regulation of cell migration // inferred from direct assay	0005634 // nucleus // inferred from electronic annotation /// 0005737 // cytoplasm // inferred from electronic annotation /// 0005768 // endosome // inferred from electronic annotation /// 0005768 // endosome // traceable author statement /// 0005769 // early endosome // inferred from electronic annotation /// 0005783 // endoplasmic reticulum // inferred from electronic annotation /// 0005819 // …	0004721 // phosphoprotein phosphatase activity // inferred from electronic annotation /// 0004725 // protein tyrosine phosphatase activity // inferred from electronic annotation /// 0004727 // prenylated protein tyrosine phosphatase activity // traceable author statement /// 0016787 // hydrolase activity // inferred from electronic annotation /// 0016791 // phosphatase activity // inferred from e…	predicted gene, EG546482 /// predicted gene, EG667723 /// similar to killer cell lectin-like receptor subfamily A member 2 /// predicted gene, OTTMUSG00000011595 /// predicted gene, OTTMUSG00000026290 /// protein tyrosine phosphatase 4a1
1428289_at	1.48964	up	Klf9	16601	0006350 // transcription // inferred from electronic annotation /// 0006355 // regulation of transcription, DNA-dependent // inferred from electronic annotation /// 0007566 // embryo implantation // inferred from direct assay /// 0045449 // regulation of transcription // inferred from direct assay /// 0050847 // progesterone receptor signaling pathway // inferred from direct assay	0005622 // intracellular // inferred from electronic annotation /// 0005634 // nucleus // inferred from direct assay /// 0005634 // nucleus // inferred from electronic annotation	0003676 // nucleic acid binding // inferred from electronic annotation /// 0003677 // DNA binding // inferred from sequence or structural similarity /// 0003677 // DNA binding // inferred from electronic annotation /// 0008270 // zinc ion binding // inferred from electronic annotation /// 0030528 // transcription regulator activity // inferred from direct assay /// 0046872 // metal ion binding //…	Kruppel-like factor 9
1417680_at	1.48856	up	Kcna5	16493	0006810 // transport // inferred from electronic annotation /// 0006811 // ion transport // inferred from electronic annotation /// 0006813 // potassium ion transport // inferred from direct assay /// 0006813 // potassium ion transport // inferred from electronic annotation /// 0042391 // regulation of membrane potential // inferred from genetic interaction /// 0043267 // negative regulation of p…	0005794 // Golgi apparatus // inferred from electronic annotation /// 0005886 // plasma membrane // inferred from direct assay /// 0005886 // plasma membrane // inferred from electronic annotation /// 0005887 // integral to plasma membrane // inferred by curator /// 0008076 // voltage-gated potassium channel complex // inferred from electronic annotation /// 0016020 // membrane // inferred from e…	0005216 // ion channel activity // inferred from electronic annotation /// 0005244 // voltage-gated ion channel activity // inferred from electronic annotation /// 0005249 // voltage-gated potassium channel activity // inferred from direct assay /// 0005249 // voltage-gated potassium channel activity // inferred from electronic annotation /// 0005267 // potassium channel activity // inferred from…	potassium voltage-gated channel, shaker-related subfamily, member 5
1443116_at	1.4883	up	Psme4	103554	0007275 // multicellular organismal development // inferred from electronic annotation /// 0007283 // spermatogenesis // inferred from electronic annotation /// 0030154 // cell differentiation // inferred from electronic annotation	0005634 // nucleus // inferred from electronic annotation /// 0005829 // cytosol // inferred from electronic annotation /// 0016607 // nuclear speck // inferred from electronic annotation /// 0043234 // protein complex // inferred from electronic annotation	0005488 // binding // inferred from electronic annotation	Proteasome (prosome, macropain) activator subunit 4, mRNA (cDNA clone IMAGE:4987120)
1438519_at	1.48808	up	Klhl24	75785		0005737 // cytoplasm // inferred from electronic annotation /// 0042995 // cell projection // inferred from electronic annotation /// 0043204 // perikaryon // inferred from electronic annotation	0005515 // protein binding // inferred from electronic annotation	kelch-like 24 (Drosophila)
1436435_at	1.48629	up	9530026P05Rik	330385				RIKEN cDNA 9530026P05 gene
1422804_at	1.48513	up	Serpinb6b	20708			0004867 // serine-type endopeptidase inhibitor activity // inferred from electronic annotation	serine (or cysteine) peptidase inhibitor, clade B, member 6b
1420991_at	1.4848	up	Ankrd1	107765	0006357 // regulation of transcription from RNA polymerase II promoter // inferred from direct assay	0005634 // nucleus // inferred from direct assay /// 0005634 // nucleus // inferred from electronic annotation /// 0005667 // transcription factor complex // inferred from direct assay /// 0005737 // cytoplasm // inferred from direct assay /// 0031674 // I band // inferred from direct assay	0003714 // transcription corepressor activity // inferred from direct assay /// 0005515 // protein binding // inferred from physical interaction	ankyrin repeat domain 1 (cardiac muscle)
1436549_a_at	1.48213	up	Hnrnpa1	15382	0000380 // alternative nuclear mRNA splicing, via spliceosome // inferred from direct assay /// 0006397 // mRNA processing // inferred from electronic annotation /// 0006810 // transport // inferred from electronic annotation /// 0008380 // RNA splicing // inferred from direct assay /// 0008380 // RNA splicing // inferred from electronic annotation /// 0051028 // mRNA transport // inferred from e…	0005634 // nucleus // inferred from direct assay /// 0005634 // nucleus // inferred from electronic annotation /// 0005654 // nucleoplasm // inferred from sequence or structural similarity /// 0005681 // spliceosome // inferred from electronic annotation /// 0005681 // spliceosome // inferred from sequence or structural similarity /// 0005737 // cytoplasm // inferred from electronic annotation //…	0000166 // nucleotide binding // inferred from electronic annotation /// 0003676 // nucleic acid binding // inferred from electronic annotation /// 0003697 // single-stranded DNA binding // inferred from sequence or structural similarity /// 0003723 // RNA binding // inferred from electronic annotation	heterogeneous nuclear ribonucleoprotein A1
1428487_s_at	1.48159	up	Coq10b	67876		0005739 // mitochondrion // inferred from electronic annotation		coenzyme Q10 homolog B (S. cerevisiae)
1440830_at	1.48156	up	Gpr116	224792	0007166 // cell surface receptor linked signal transduction // inferred from electronic annotation /// 0007186 // G-protein coupled receptor protein signaling pathway // inferred from electronic annotation /// 0007218 // neuropeptide signaling pathway // inferred from electronic annotation	0005886 // plasma membrane // inferred from electronic annotation /// 0016020 // membrane // inferred from electronic annotation /// 0016021 // integral to membrane // inferred from electronic annotation	0004888 // transmembrane receptor activity // inferred from electronic annotation /// 0004930 // G-protein coupled receptor activity // inferred from electronic annotation	G protein-coupled receptor 116
1439050_at	1.48065	up
1458369_at	1.47936	up	2310050B05Rik	69678				RIKEN cDNA 2310050B05 gene
1451270_at	1.47911	up	Dusp18	75219	0006470 // protein amino acid dephosphorylation // inferred from electronic annotation /// 0006612 // protein targeting to membrane // inferred from sequence or structural similarity /// 0006626 // protein targeting to mitochondrion // inferred from sequence or structural similarity /// 0016311 // dephosphorylation // inferred from electronic annotation /// 0033365 // protein localization in orga…	0005634 // nucleus // inferred from electronic annotation /// 0005737 // cytoplasm // inferred from sequence or structural similarity /// 0005737 // cytoplasm // inferred from electronic annotation /// 0005739 // mitochondrion // inferred from sequence or structural similarity /// 0005743 // mitochondrial inner membrane // inferred from sequence or structural similarity /// 0005758 // mitochondri…	0004721 // phosphoprotein phosphatase activity // inferred from electronic annotation /// 0004725 // protein tyrosine phosphatase activity // inferred from electronic annotation /// 0008138 // protein tyrosine/serine/threonine phosphatase activity // inferred from electronic annotation /// 0016787 // hydrolase activity // inferred from electronic annotation /// 0016791 // phosphatase activity // …	dual specificity phosphatase 18
1428306_at	1.4779	up	Ddit4	74747	0006915 // apoptosis // inferred from electronic annotation /// 0009968 // negative regulation of signal transduction // inferred from electronic annotation	0005622 // intracellular // inferred from electronic annotation /// 0005737 // cytoplasm // inferred from electronic annotation /// 0005737 // cytoplasm // inferred from sequence or structural similarity		DNA-damage-inducible transcript 4
1437829_s_at	1.47726	up	Eef2k	13631	0006468 // protein amino acid phosphorylation // inferred from electronic annotation		0000166 // nucleotide binding // inferred from electronic annotation /// 0004674 // protein serine/threonine kinase activity // inferred from electronic annotation /// 0004686 // elongation factor-2 kinase activity // inferred from electronic annotation /// 0005488 // binding // inferred from electronic annotation /// 0005509 // calcium ion binding // inferred from electronic annotation /// 00055…	eukaryotic elongation factor-2 kinase
1448306_at	1.47688	up	Nfkbia	18035	0000060 // protein import into nucleus, translocation // inferred from direct assay /// 0031663 // lipopolysaccharide-mediated signaling pathway // inferred from direct assay /// 0032495 // response to muramyl dipeptide // inferred from direct assay /// 0032496 // response to lipopolysaccharide // inferred from direct assay /// 0034142 // toll-like receptor 4 signaling pathway // inferred from di…	0005634 // nucleus // inferred from direct assay /// 0005634 // nucleus // inferred from electronic annotation /// 0005737 // cytoplasm // inferred from direct assay /// 0005737 // cytoplasm // inferred from electronic annotation /// 0005829 // cytosol // inferred from direct assay	0005515 // protein binding // inferred from physical interaction /// 0008139 // nuclear localization sequence binding // inferred from electronic annotation /// 0031625 // ubiquitin protein ligase binding // inferred from electronic annotation /// 0042802 // identical protein binding // inferred from electronic annotation /// 0051059 // NF-kappaB binding // inferred from electronic annotation	nuclear factor of kappa light polypeptide gene enhancer in B-cells inhibitor, alpha
1457177_at	1.47663	up
1421118_a_at	1.47468	up	Gpr56	14766	0007165 // signal transduction // inferred from electronic annotation /// 0007166 // cell surface receptor linked signal transduction // inferred from electronic annotation /// 0007186 // G-protein coupled receptor protein signaling pathway // inferred from electronic annotation /// 0007218 // neuropeptide signaling pathway // inferred from electronic annotation	0005886 // plasma membrane // inferred from electronic annotation /// 0016020 // membrane // inferred from electronic annotation /// 0016021 // integral to membrane // inferred from electronic annotation	0004871 // signal transducer activity // inferred from electronic annotation /// 0004872 // receptor activity // inferred from electronic annotation /// 0004888 // transmembrane receptor activity // inferred from electronic annotation /// 0004930 // G-protein coupled receptor activity // inferred from electronic annotation	G protein-coupled receptor 56
1416835_s_at	1.46922	up	Amd1	11702	0001701 // in utero embryonic development // inferred from mutant phenotype /// 0006596 // polyamine biosynthetic process // inferred from electronic annotation /// 0006597 // spermine biosynthetic process // inferred from direct assay /// 0006597 // spermine biosynthetic process // inferred from electronic annotation /// 0008295 // spermidine biosynthetic process // inferred from direct assay //…		0004014 // adenosylmethionine decarboxylase activity // inferred from direct assay /// 0004014 // adenosylmethionine decarboxylase activity // inferred from electronic annotation /// 0005515 // protein binding // inferred from physical interaction /// 0016829 // lyase activity // inferred from electronic annotation /// 0016831 // carboxy-lyase activity // inferred from electronic annotation	S-adenosylmethionine decarboxylase 1
1429642_at	1.46904	up	Anubl1	67492				AN1, ubiquitin-like, homolog (Xenopus laevis)
1434832_at	1.46691	up	Foxo3	56484	0001542 // ovulation from ovarian follicle // inferred from mutant phenotype /// 0001544 // initiation of primordial ovarian follicle growth // inferred from mutant phenotype /// 0001547 // antral ovarian follicle growth // inferred from mutant phenotype /// 0001556 // oocyte maturation // inferred from mutant phenotype /// 0006355 // regulation of transcription, DNA-dependent // inferred from di…	0005624 // membrane fraction // inferred from direct assay /// 0005634 // nucleus // inferred from direct assay /// 0005634 // nucleus // inferred from electronic annotation /// 0005737 // cytoplasm // inferred from direct assay	0003677 // DNA binding // inferred from direct assay /// 0003677 // DNA binding // inferred from electronic annotation /// 0003700 // transcription factor activity // inferred from direct assay /// 0003700 // transcription factor activity // not recorded /// 0003700 // transcription factor activity // inferred from electronic annotation /// 0016563 // transcription activator activity // inferred …	forkhead box O3
1429664_at	1.46588	up	Cdkl1	71091	0006468 // protein amino acid phosphorylation // inferred from electronic annotation	0005634 // nucleus // inferred from electronic annotation /// 0005737 // cytoplasm // inferred from electronic annotation	0000166 // nucleotide binding // inferred from electronic annotation /// 0004672 // protein kinase activity // inferred from electronic annotation /// 0004674 // protein serine/threonine kinase activity // inferred from electronic annotation /// 0004693 // cyclin-dependent protein kinase activity // inferred from electronic annotation /// 0005524 // ATP binding // inferred from electronic annotat…	cyclin-dependent kinase-like 1 (CDC2-related kinase)
1438657_x_at	1.46499	up	EG667723 /// OTTMUSG00000011595 /// OTTMUSG00000026290 /// Ptp4a1	19243 /// 433406 /// 627166 /// 667723	0006470 // protein amino acid dephosphorylation // inferred from electronic annotation /// 0007049 // cell cycle // inferred from electronic annotation /// 0007275 // multicellular organismal development // inferred from electronic annotation /// 0016311 // dephosphorylation // inferred from electronic annotation /// 0030335 // positive regulation of cell migration // inferred from direct assay	0005634 // nucleus // inferred from electronic annotation /// 0005737 // cytoplasm // inferred from electronic annotation /// 0005768 // endosome // inferred from electronic annotation /// 0005768 // endosome // traceable author statement /// 0005769 // early endosome // inferred from electronic annotation /// 0005783 // endoplasmic reticulum // inferred from electronic annotation /// 0005819 // …	0004721 // phosphoprotein phosphatase activity // inferred from electronic annotation /// 0004725 // protein tyrosine phosphatase activity // inferred from electronic annotation /// 0004727 // prenylated protein tyrosine phosphatase activity // traceable author statement /// 0016787 // hydrolase activity // inferred from electronic annotation /// 0016791 // phosphatase activity // inferred from e…	predicted gene, EG667723 /// predicted gene, OTTMUSG00000011595 /// predicted gene, OTTMUSG00000026290 /// protein tyrosine phosphatase 4a1
1439495_at	1.46463	up	4933407H18Rik	71101				RIKEN cDNA 4933407H18 gene
1452207_at	1.46441	up	Cited2	17684	0001568 // blood vessel development // inferred from mutant phenotype /// 0001570 // vasculogenesis // inferred from mutant phenotype /// 0001701 // in utero embryonic development // inferred from mutant phenotype /// 0001829 // trophectodermal cell differentiation // inferred from mutant phenotype /// 0001889 // liver development // inferred from mutant phenotype /// 0001892 // embryonic placent…	0000790 // nuclear chromatin // inferred from direct assay /// 0005634 // nucleus // inferred from direct assay /// 0005634 // nucleus // inferred from electronic annotation	0003700 // transcription factor activity // inferred from direct assay /// 0003712 // transcription cofactor activity // traceable author statement /// 0003713 // transcription coactivator activity // inferred from physical interaction /// 0005515 // protein binding // inferred from physical interaction /// 0030528 // transcription regulator activity // inferred from electronic annotation	Cbp/p300-interacting transactivator, with Glu/Asp-rich carboxy-terminal domain, 2
1433206_at	1.46411	up	5033430J17Rik	76004				RIKEN cDNA 5033430J17 gene
1420772_a_at	1.4638	up	Tsc22d3	14605	0006355 // regulation of transcription, DNA-dependent // inferred from electronic annotation /// 0006916 // anti-apoptosis // inferred from direct assay /// 0006970 // response to osmotic stress // inferred from direct assay		0003700 // transcription factor activity // inferred from electronic annotation	TSC22 domain family, member 3
1435137_s_at	1.46225	up	1200015M12Rik /// 1200016E24Rik /// A130040M12Rik /// E430024C06Rik	319202 /// 319269 /// 319443 /// 71739				RIKEN cDNA 1200015M12 gene /// RIKEN cDNA 1200016E24 gene /// RIKEN cDNA A130040M12 gene /// RIKEN cDNA E430024C06 gene
1427038_at	1.46189	up	Penk	18619	0001662 // behavioral fear response // inferred from mutant phenotype /// 0007218 // neuropeptide signaling pathway // inferred from electronic annotation /// 0007610 // behavior // inferred from mutant phenotype /// 0019233 // sensory perception of pain // inferred from mutant phenotype	0005576 // extracellular region // inferred from electronic annotation	0001515 // opioid peptide activity // inferred from electronic annotation	preproenkephalin
1425745_a_at	1.46036	up	Tacc2	57752	0000226 // microtubule cytoskeleton organization // inferred from mutant phenotype /// 0008283 // cell proliferation // inferred from mutant phenotype /// 0021987 // cerebral cortex development // inferred from mutant phenotype /// 0022008 // neurogenesis // inferred from mutant phenotype /// 0022027 // interkinetic nuclear migration // inferred from mutant phenotype /// 0030953 // spindle astral…	0005634 // nucleus // inferred from electronic annotation /// 0005737 // cytoplasm // inferred from electronic annotation /// 0005813 // centrosome // inferred from electronic annotation	0005515 // protein binding // not recorded /// 0019904 // protein domain specific binding // inferred from physical interaction /// 0035257 // nuclear hormone receptor binding // not recorded	transforming, acidic coiled-coil containing protein 2
1456156_at	1.45827	up	Lepr	16847	0001525 // angiogenesis // inferred from electronic annotation /// 0001542 // ovulation from ovarian follicle // inferred from electronic annotation /// 0007165 // signal transduction // traceable author statement /// 0007565 // female pregnancy // inferred from electronic annotation /// 0008203 // cholesterol metabolic process // inferred from genetic interaction /// 0019222 // regulation of met…	0005576 // extracellular region // inferred from electronic annotation /// 0005615 // extracellular space // inferred from electronic annotation /// 0005886 // plasma membrane // inferred from electronic annotation /// 0005887 // integral to plasma membrane // traceable author statement /// 0016020 // membrane // inferred from electronic annotation /// 0016021 // integral to membrane // inferred …	0004872 // receptor activity // inferred from electronic annotation /// 0004888 // transmembrane receptor activity // traceable author statement /// 0004896 // cytokine receptor activity // inferred from electronic annotation /// 0005515 // protein binding // inferred from physical interaction /// 0005515 // protein binding // inferred from electronic annotation /// 0016500 // protein-hormone rec…	leptin receptor
1456918_at	1.45693	up	Raph1	77300				Ras association (RalGDS/AF-6) and pleckstrin homology domains 1
1417883_at	1.45527	up	Gstt2	14872	0006749 // glutathione metabolic process // not recorded /// 0006749 // glutathione metabolic process // inferred from electronic annotation	0005634 // nucleus // inferred from electronic annotation /// 0005737 // cytoplasm // inferred from electronic annotation	0004364 // glutathione transferase activity // not recorded /// 0004364 // glutathione transferase activity // inferred from electronic annotation /// 0016740 // transferase activity // inferred from electronic annotation	glutathione S-transferase, theta 2
1425626_at	1.45354	up	Gstm1	14862	0008152 // metabolic process // inferred from electronic annotation	0005737 // cytoplasm // inferred from electronic annotation	0004364 // glutathione transferase activity // inferred from electronic annotation /// 0016740 // transferase activity // inferred from electronic annotation	glutathione S-transferase, mu 1
1428543_at	1.45338	up	Ppat	231327	0008152 // metabolic process // inferred from electronic annotation /// 0009113 // purine base biosynthetic process // inferred from electronic annotation /// 0009116 // nucleoside metabolic process // inferred from electronic annotation		0004044 // amidophosphoribosyltransferase activity // inferred from electronic annotation /// 0016740 // transferase activity // inferred from electronic annotation	phosphoribosyl pyrophosphate amidotransferase
1417969_at	1.45327	up	Fbxo31	76454	0019941 // modification-dependent protein catabolic process // inferred from electronic annotation			F-box protein 31
1424211_at	1.45283	up	Slc25a33	70556	0006810 // transport // inferred from electronic annotation	0005739 // mitochondrion // inferred from electronic annotation /// 0005743 // mitochondrial inner membrane // inferred from electronic annotation /// 0016020 // membrane // inferred from electronic annotation /// 0016021 // integral to membrane // inferred from electronic annotation	0005488 // binding // inferred from electronic annotation	solute carrier family 25, member 33
1451336_at	1.45172	up	Lgals4	16855			0005515 // protein binding // inferred from physical interaction /// 0005529 // sugar binding // inferred from electronic annotation	lectin, galactose binding, soluble 4
1455506_at	1.45053	up	Slc25a34	384071	0006810 // transport // inferred from electronic annotation	0005739 // mitochondrion // inferred from electronic annotation /// 0005743 // mitochondrial inner membrane // inferred from electronic annotation /// 0016020 // membrane // inferred from electronic annotation /// 0016021 // integral to membrane // inferred from electronic annotation	0005215 // transporter activity // inferred from electronic annotation /// 0005488 // binding // inferred from electronic annotation	solute carrier family 25, member 34
1443618_at	1.45015	up	Pdzd2	68070		0030054 // cell junction // not recorded	0005515 // protein binding // not recorded /// 0005515 // protein binding // inferred from electronic annotation	PDZ domain containing 2
1438175_x_at	1.44977	up	Myom2	17930	0006936 // muscle contraction // inferred from physical interaction	0005634 // nucleus // inferred from electronic annotation /// 0005737 // cytoplasm // inferred from electronic annotation /// 0005739 // mitochondrion // inferred from electronic annotation /// 0005856 // cytoskeleton // traceable author statement	0005200 // structural constituent of cytoskeleton // traceable author statement	myomesin 2
1426604_at	1.44931	up	Rnasel	24014	0006397 // mRNA processing // inferred from electronic annotation /// 0006468 // protein amino acid phosphorylation // inferred from electronic annotation	0005737 // cytoplasm // inferred from electronic annotation /// 0005739 // mitochondrion // inferred from electronic annotation	0000166 // nucleotide binding // inferred from electronic annotation /// 0003723 // RNA binding // inferred from electronic annotation /// 0004518 // nuclease activity // inferred from electronic annotation /// 0004519 // endonuclease activity // inferred from electronic annotation /// 0004672 // protein kinase activity // inferred from electronic annotation /// 0005524 // ATP binding // inferred…	ribonuclease L (2', 5'-oligoisoadenylate synthetase-dependent)
1425644_at	1.44776	up	Lepr	16847	0001525 // angiogenesis // inferred from electronic annotation /// 0001542 // ovulation from ovarian follicle // inferred from electronic annotation /// 0007165 // signal transduction // traceable author statement /// 0007565 // female pregnancy // inferred from electronic annotation /// 0008203 // cholesterol metabolic process // inferred from genetic interaction /// 0019222 // regulation of met…	0005576 // extracellular region // inferred from electronic annotation /// 0005615 // extracellular space // inferred from electronic annotation /// 0005886 // plasma membrane // inferred from electronic annotation /// 0005887 // integral to plasma membrane // traceable author statement /// 0016020 // membrane // inferred from electronic annotation /// 0016021 // integral to membrane // inferred …	0004872 // receptor activity // inferred from electronic annotation /// 0004888 // transmembrane receptor activity // traceable author statement /// 0004896 // cytokine receptor activity // inferred from electronic annotation /// 0005515 // protein binding // inferred from physical interaction /// 0005515 // protein binding // inferred from electronic annotation /// 0016500 // protein-hormone rec…	leptin receptor
1445873_at	1.44766	up	Tfdp2	211586	0006350 // transcription // inferred from electronic annotation /// 0006355 // regulation of transcription, DNA-dependent // inferred from direct assay /// 0006355 // regulation of transcription, DNA-dependent // inferred from electronic annotation /// 0007049 // cell cycle // inferred from electronic annotation	0005634 // nucleus // inferred from electronic annotation /// 0005635 // nuclear envelope // traceable author statement /// 0005667 // transcription factor complex // inferred by curator /// 0005667 // transcription factor complex // inferred from electronic annotation	0003677 // DNA binding // inferred from electronic annotation /// 0003700 // transcription factor activity // inferred from direct assay /// 0003700 // transcription factor activity // inferred from electronic annotation	Transcription factor Dp 2, mRNA (cDNA clone MGC:176041 IMAGE:9055692)
1451574_at	1.44746	up	Bcl9	77578	0016055 // Wnt receptor signaling pathway // inferred from electronic annotation	0005634 // nucleus // inferred from electronic annotation	0005515 // protein binding // inferred from electronic annotation	B-cell CLL/lymphoma 9
1429918_at	1.44675	up	Arhgap20	244867	0007165 // signal transduction // inferred from electronic annotation	0005622 // intracellular // inferred from electronic annotation	0005096 // GTPase activator activity // inferred from electronic annotation	Rho GTPase activating protein 20
1444783_at	1.4461	up
1454646_at	1.44482	up	Tcp11l2	216198				t-complex 11 (mouse) like 2
1420992_at	1.4442	up	Ankrd1	107765	0006357 // regulation of transcription from RNA polymerase II promoter // inferred from direct assay	0005634 // nucleus // inferred from direct assay /// 0005634 // nucleus // inferred from electronic annotation /// 0005667 // transcription factor complex // inferred from direct assay /// 0005737 // cytoplasm // inferred from direct assay /// 0031674 // I band // inferred from direct assay	0003714 // transcription corepressor activity // inferred from direct assay /// 0005515 // protein binding // inferred from physical interaction	ankyrin repeat domain 1 (cardiac muscle)
1425066_a_at	1.44398	up	Mtmr14	97287	0016311 // dephosphorylation // inferred from electronic annotation	0005737 // cytoplasm // inferred from electronic annotation	0004725 // protein tyrosine phosphatase activity // inferred from electronic annotation /// 0016787 // hydrolase activity // inferred from electronic annotation /// 0016791 // phosphatase activity // inferred from electronic annotation	myotubularin related protein 14
1426624_a_at	1.44271	up	Ypel3	66090	0006915 // apoptosis // inferred from electronic annotation	0005634 // nucleus // inferred from electronic annotation		yippee-like 3 (Drosophila)
1438394_x_at	1.44233	up	Krt4	16682	0009790 // embryonic development // traceable author statement /// 0030855 // epithelial cell differentiation // inferred from mutant phenotype /// 0050680 // negative regulation of epithelial cell proliferation // inferred from mutant phenotype	0005882 // intermediate filament // inferred from electronic annotation /// 0045095 // keratin filament // traceable author statement /// 0045095 // keratin filament // inferred from electronic annotation	0005198 // structural molecule activity // inferred from electronic annotation /// 0046982 // protein heterodimerization activity // traceable author statement	keratin 4
1429235_at	1.44209	up	Galntl2	78754		0000139 // Golgi membrane // inferred from electronic annotation /// 0005794 // Golgi apparatus // inferred from electronic annotation /// 0016020 // membrane // inferred from electronic annotation /// 0016021 // integral to membrane // inferred from electronic annotation /// 0030133 // transport vesicle // inferred from electronic annotation	0004653 // polypeptide N-acetylgalactosaminyltransferase activity // inferred from electronic annotation /// 0005509 // calcium ion binding // inferred from electronic annotation /// 0005529 // sugar binding // inferred from electronic annotation /// 0016740 // transferase activity // inferred from electronic annotation /// 0016757 // transferase activity, transferring glycosyl groups // inferred…	UDP-N-acetyl-alpha-D-galactosamine:polypeptide N-acetylgalactosaminyltransferase-like 2
1438931_s_at	1.44058	up	LOC100047324 /// Sesn1	100047324 /// 140742	0007050 // cell cycle arrest // inferred from electronic annotation	0005634 // nucleus // inferred from electronic annotation		similar to Sesn1 protein /// sestrin 1
1422811_at	1.44035	up	Slc27a1	26457	0001676 // long-chain fatty acid metabolic process // traceable author statement /// 0006629 // lipid metabolic process // inferred from electronic annotation /// 0006631 // fatty acid metabolic process // inferred from electronic annotation /// 0006810 // transport // inferred from electronic annotation /// 0006869 // lipid transport // inferred from electronic annotation /// 0008152 // metaboli…	0005737 // cytoplasm // inferred from electronic annotation /// 0005886 // plasma membrane // traceable author statement /// 0005886 // plasma membrane // inferred from electronic annotation /// 0012505 // endomembrane system // inferred from electronic annotation /// 0016020 // membrane // inferred from electronic annotation /// 0016021 // integral to membrane // inferred from electronic annotat…	0000166 // nucleotide binding // inferred from electronic annotation /// 0003824 // catalytic activity // inferred from electronic annotation /// 0004467 // long-chain-fatty-acid-CoA ligase activity // traceable author statement /// 0005215 // transporter activity // inferred from electronic annotation /// 0005488 // binding // inferred from electronic annotation /// 0016874 // ligase activity //…	solute carrier family 27 (fatty acid transporter), member 1
1424776_a_at	1.44034	up	Slc25a28	246696	0006810 // transport // inferred from electronic annotation /// 0006811 // ion transport // inferred from electronic annotation /// 0006826 // iron ion transport // inferred from electronic annotation	0005739 // mitochondrion // inferred from direct assay /// 0005739 // mitochondrion // inferred from electronic annotation /// 0005743 // mitochondrial inner membrane // inferred from electronic annotation /// 0016020 // membrane // inferred from electronic annotation /// 0016021 // integral to membrane // inferred from electronic annotation	0005488 // binding // inferred from electronic annotation /// 0005506 // iron ion binding // inferred from electronic annotation	solute carrier family 25, member 28
1454967_at	1.43999	up
1454774_at	1.43948	up	Zfp445	235682	0006350 // transcription // inferred from electronic annotation /// 0006355 // regulation of transcription, DNA-dependent // inferred from electronic annotation	0005622 // intracellular // inferred from electronic annotation /// 0005634 // nucleus // inferred from electronic annotation	0003676 // nucleic acid binding // inferred from electronic annotation /// 0003677 // DNA binding // inferred from electronic annotation /// 0003700 // transcription factor activity // inferred from electronic annotation /// 0008270 // zinc ion binding // inferred from electronic annotation /// 0046872 // metal ion binding // inferred from electronic annotation	zinc finger protein 445
1433856_at	1.43782	up	Hisppd1	227399	0006020 // inositol metabolic process // inferred from sequence or structural similarity	0005737 // cytoplasm // inferred from electronic annotation /// 0005829 // cytosol // inferred from sequence or structural similarity	0000166 // nucleotide binding // inferred from electronic annotation /// 0000827 // inositol 1,3,4,5,6-pentakisphosphate kinase activity // inferred from sequence or structural similarity /// 0000832 // inositol hexakisphosphate 5-kinase activity // inferred from sequence or structural similarity /// 0003993 // acid phosphatase activity // inferred from electronic annotation /// 0005524 // ATP bi…	histidine acid phosphatase domain containing 1
1437617_x_at	1.43749	up	1110034G24Rik	73747				RIKEN cDNA 1110034G24 gene
1434831_a_at	1.4365	up	Foxo3	56484	0001542 // ovulation from ovarian follicle // inferred from mutant phenotype /// 0001544 // initiation of primordial ovarian follicle growth // inferred from mutant phenotype /// 0001547 // antral ovarian follicle growth // inferred from mutant phenotype /// 0001556 // oocyte maturation // inferred from mutant phenotype /// 0006355 // regulation of transcription, DNA-dependent // inferred from di…	0005624 // membrane fraction // inferred from direct assay /// 0005634 // nucleus // inferred from direct assay /// 0005634 // nucleus // inferred from electronic annotation /// 0005737 // cytoplasm // inferred from direct assay	0003677 // DNA binding // inferred from direct assay /// 0003677 // DNA binding // inferred from electronic annotation /// 0003700 // transcription factor activity // inferred from direct assay /// 0003700 // transcription factor activity // not recorded /// 0003700 // transcription factor activity // inferred from electronic annotation /// 0016563 // transcription activator activity // inferred …	forkhead box O3
1417422_at	1.43557	up	Gnmt	14711	0006555 // methionine metabolic process // inferred from electronic annotation	0005737 // cytoplasm // inferred from electronic annotation	0005542 // folic acid binding // inferred from electronic annotation /// 0008168 // methyltransferase activity // inferred from electronic annotation /// 0016740 // transferase activity // inferred from electronic annotation /// 0017174 // glycine N-methyltransferase activity // inferred from electronic annotation	glycine N-methyltransferase
1419674_a_at	1.43482	up	Dpep1	13479	0006508 // proteolysis // inferred from electronic annotation	0005886 // plasma membrane // inferred from electronic annotation /// 0016020 // membrane // inferred from electronic annotation /// 0016324 // apical plasma membrane // inferred from electronic annotation /// 0031225 // anchored to membrane // inferred from electronic annotation /// 0042995 // cell projection // inferred from electronic annotation	0005515 // protein binding // inferred from electronic annotation /// 0008233 // peptidase activity // inferred from electronic annotation /// 0008235 // metalloexopeptidase activity // inferred from electronic annotation /// 0008237 // metallopeptidase activity // inferred from electronic annotation /// 0008239 // dipeptidyl-peptidase activity // inferred from electronic annotation /// 0008270 /…	dipeptidase 1 (renal)
1454742_at	1.4336	up	Rasgef1b	320292	0007264 // small GTPase mediated signal transduction // inferred from electronic annotation /// 0051056 // regulation of small GTPase mediated signal transduction // inferred from electronic annotation	0005622 // intracellular // inferred from electronic annotation	0005085 // guanyl-nucleotide exchange factor activity // inferred from electronic annotation	RasGEF domain family, member 1B
1460033_at	1.43322	up	C030002C11Rik	320977				RIKEN cDNA C030002C11 gene
1441765_at	1.43208	up
1447322_at	1.43185	up
1454720_at	1.43165	up	Apba3 /// Hs3st5	319415 /// 57267	0001701 // in utero embryonic development // inferred from genetic interaction /// 0006477 // protein amino acid sulfation // inferred from electronic annotation /// 0006810 // transport // inferred from electronic annotation /// 0007268 // synaptic transmission // inferred from genetic interaction /// 0010468 // regulation of gene expression // inferred from genetic interaction /// 0015015 // he…	0000139 // Golgi membrane // inferred from electronic annotation /// 0005794 // Golgi apparatus // inferred from electronic annotation /// 0016020 // membrane // inferred from electronic annotation /// 0016021 // integral to membrane // inferred from electronic annotation	0005515 // protein binding // inferred from electronic annotation /// 0005515 // protein binding // inferred from sequence or structural similarity /// 0008146 // sulfotransferase activity // inferred from electronic annotation /// 0008467 // [heparan sulfate]-glucosamine 3-sulfotransferase 1 activity // not recorded /// 0008467 // [heparan sulfate]-glucosamine 3-sulfotransferase 1 activity // in…	amyloid beta (A4) precursor protein-binding, family A, member 3 /// heparan sulfate (glucosamine) 3-O-sulfotransferase 5
1425281_a_at	1.4315	up	Tsc22d3	14605	0006355 // regulation of transcription, DNA-dependent // inferred from electronic annotation /// 0006916 // anti-apoptosis // inferred from direct assay /// 0006970 // response to osmotic stress // inferred from direct assay		0003700 // transcription factor activity // inferred from electronic annotation	TSC22 domain family, member 3
1425619_s_at	1.43133	up	Dsg2	13511	0007155 // cell adhesion // inferred from electronic annotation /// 0007156 // homophilic cell adhesion // inferred from electronic annotation	0005886 // plasma membrane // inferred from electronic annotation /// 0016020 // membrane // inferred from electronic annotation /// 0016021 // integral to membrane // inferred from electronic annotation /// 0030054 // cell junction // inferred from electronic annotation /// 0030057 // desmosome // inferred from direct assay /// 0031965 // nuclear membrane // inferred from electronic annotation	0005509 // calcium ion binding // inferred from electronic annotation /// 0005515 // protein binding // inferred from electronic annotation	desmoglein 2
1452345_at	1.43065	up	Lmod2	93677		0005856 // cytoskeleton // inferred from electronic annotation	0003779 // actin binding // inferred from electronic annotation /// 0005523 // tropomyosin binding // inferred from electronic annotation	leiomodin 2 (cardiac)
1457117_at	1.42997	up	Nfe2l2	18024	0006350 // transcription // inferred from electronic annotation /// 0006355 // regulation of transcription, DNA-dependent // inferred from direct assay /// 0006355 // regulation of transcription, DNA-dependent // inferred from electronic annotation /// 0030968 // endoplasmic reticulum unfolded protein response // inferred from direct assay /// 0045449 // regulation of transcription // inferred fr…	0005634 // nucleus // inferred from direct assay /// 0005634 // nucleus // inferred from electronic annotation /// 0005737 // cytoplasm // inferred from physical interaction /// 0005737 // cytoplasm // inferred from electronic annotation	0003677 // DNA binding // inferred from direct assay /// 0003677 // DNA binding // inferred from electronic annotation /// 0003700 // transcription factor activity // inferred from direct assay /// 0003700 // transcription factor activity // inferred from electronic annotation /// 0005515 // protein binding // inferred from physical interaction /// 0016563 // transcription activator activity // i…	nuclear factor, erythroid derived 2, like 2
1429870_at	1.42895	up	Tnik	665113	0006468 // protein amino acid phosphorylation // inferred from electronic annotation /// 0006950 // response to stress // inferred from sequence or structural similarity /// 0007243 // protein kinase cascade // inferred from sequence or structural similarity		0000166 // nucleotide binding // inferred from electronic annotation /// 0004672 // protein kinase activity // inferred from electronic annotation /// 0004674 // protein serine/threonine kinase activity // inferred from electronic annotation /// 0004674 // protein serine/threonine kinase activity // inferred from sequence or structural similarity /// 0005083 // small GTPase regulator activity // …	TRAF2 and NCK interacting kinase
1427255_s_at	1.42838	up	Zfp445	235682	0006350 // transcription // inferred from electronic annotation /// 0006355 // regulation of transcription, DNA-dependent // inferred from electronic annotation	0005622 // intracellular // inferred from electronic annotation /// 0005634 // nucleus // inferred from electronic annotation	0003676 // nucleic acid binding // inferred from electronic annotation /// 0003677 // DNA binding // inferred from electronic annotation /// 0003700 // transcription factor activity // inferred from electronic annotation /// 0008270 // zinc ion binding // inferred from electronic annotation /// 0046872 // metal ion binding // inferred from electronic annotation	zinc finger protein 445
1418181_at	1.42728	up	Ptp4a3	19245	0006470 // protein amino acid dephosphorylation // inferred from electronic annotation /// 0016311 // dephosphorylation // inferred from electronic annotation	0005768 // endosome // inferred from electronic annotation /// 0005769 // early endosome // inferred from electronic annotation /// 0005886 // plasma membrane // inferred from electronic annotation /// 0016020 // membrane // inferred from electronic annotation	0004721 // phosphoprotein phosphatase activity // inferred from electronic annotation /// 0004725 // protein tyrosine phosphatase activity // inferred from electronic annotation /// 0016787 // hydrolase activity // inferred from electronic annotation /// 0016791 // phosphatase activity // inferred from electronic annotation	protein tyrosine phosphatase 4a3
1459338_at	1.42631	up
1441779_at	1.42607	up	9530006C21Rik	77393				RIKEN cDNA 9530006C21 gene
1456793_at	1.42533	up	Cytl1	231162	0002062 // chondrocyte differentiation // inferred from direct assay /// 0045944 // positive regulation of transcription from RNA polymerase II promoter // inferred from direct assay /// 0050650 // chondroitin sulfate proteoglycan biosynthetic process // inferred from direct assay /// 0051091 // positive regulation of transcription factor activity // inferred from direct assay		0016563 // transcription activator activity // inferred from direct assay	cytokine-like 1
1457334_at	1.4243	up	C130057M05Rik	399581				RIKEN cDNA C130057M05 gene
1420998_at	1.42404	up	Etv5	104156	0006355 // regulation of transcription, DNA-dependent // inferred from electronic annotation /// 0009887 // organ morphogenesis // inferred from direct assay /// 0045941 // positive regulation of transcription // inferred from direct assay	0005634 // nucleus // inferred by curator /// 0005634 // nucleus // inferred from electronic annotation	0003677 // DNA binding // inferred from electronic annotation /// 0003700 // transcription factor activity // inferred from electronic annotation /// 0016563 // transcription activator activity // inferred from direct assay /// 0043565 // sequence-specific DNA binding // inferred from electronic annotation	ets variant gene 5
1441506_at	1.42395	up	Dcn	13179	0019800 // peptide cross-linking via chondroitin 4-sulfate glycosaminoglycan // inferred from direct assay	0005576 // extracellular region // inferred from electronic annotation /// 0005578 // proteinaceous extracellular matrix // inferred from electronic annotation /// 0005634 // nucleus // inferred from electronic annotation /// 0031012 // extracellular matrix // inferred from sequence or structural similarity	0005515 // protein binding // inferred from electronic annotation /// 0005539 // glycosaminoglycan binding // inferred from direct assay /// 0050840 // extracellular matrix binding // inferred from direct assay	decorin
1421267_a_at	1.42284	up	Cited2	17684	0001568 // blood vessel development // inferred from mutant phenotype /// 0001570 // vasculogenesis // inferred from mutant phenotype /// 0001701 // in utero embryonic development // inferred from mutant phenotype /// 0001829 // trophectodermal cell differentiation // inferred from mutant phenotype /// 0001889 // liver development // inferred from mutant phenotype /// 0001892 // embryonic placent…	0000790 // nuclear chromatin // inferred from direct assay /// 0005634 // nucleus // inferred from direct assay /// 0005634 // nucleus // inferred from electronic annotation	0003700 // transcription factor activity // inferred from direct assay /// 0003712 // transcription cofactor activity // traceable author statement /// 0003713 // transcription coactivator activity // inferred from physical interaction /// 0005515 // protein binding // inferred from physical interaction /// 0030528 // transcription regulator activity // inferred from electronic annotation	Cbp/p300-interacting transactivator, with Glu/Asp-rich carboxy-terminal domain, 2
1452332_at	1.41975	up	Ccdc85a	216613				coiled-coil domain containing 85A
1428926_at	1.41947	up	1110003O08Rik	76291				RIKEN cDNA 1110003O08 gene
1430253_at	1.41929	up	2900006B11Rik	72897				RIKEN cDNA 2900006B11 gene
1423095_s_at	1.41915	up	Crbn	58799	0006508 // proteolysis // inferred from electronic annotation	0005737 // cytoplasm // inferred from electronic annotation /// 0016020 // membrane // inferred from electronic annotation	0004176 // ATP-dependent peptidase activity // inferred from electronic annotation	cereblon
1447448_s_at	1.41859	up	Klf6	23849	0006350 // transcription // inferred from electronic annotation /// 0006355 // regulation of transcription, DNA-dependent // inferred from electronic annotation /// 0019221 // cytokine-mediated signaling pathway // inferred from direct assay	0005622 // intracellular // inferred from electronic annotation /// 0005634 // nucleus // inferred from direct assay /// 0005634 // nucleus // inferred from electronic annotation /// 0005737 // cytoplasm // inferred from direct assay	0003676 // nucleic acid binding // inferred from electronic annotation /// 0003677 // DNA binding // inferred from sequence or structural similarity /// 0003677 // DNA binding // inferred from electronic annotation /// 0008270 // zinc ion binding // inferred from electronic annotation /// 0046872 // metal ion binding // inferred from electronic annotation	Kruppel-like factor 6
1425464_at	1.4183	up	Gata6	14465	0001701 // in utero embryonic development // inferred from mutant phenotype /// 0001889 // liver development // inferred from mutant phenotype /// 0006350 // transcription // inferred from electronic annotation /// 0006355 // regulation of transcription, DNA-dependent // inferred from direct assay /// 0006355 // regulation of transcription, DNA-dependent // inferred from electronic annotation ///…	0005634 // nucleus // inferred from direct assay /// 0005634 // nucleus // inferred from electronic annotation /// 0005667 // transcription factor complex // inferred from direct assay	0003677 // DNA binding // inferred from direct assay /// 0003677 // DNA binding // inferred from electronic annotation /// 0003682 // chromatin binding // inferred from direct assay /// 0003700 // transcription factor activity // inferred from direct assay /// 0003700 // transcription factor activity // inferred from electronic annotation /// 0003705 // RNA polymerase II transcription factor acti…	GATA binding protein 6
1440076_at	1.41819	up
1433485_x_at	1.41815	up	Gpr56	14766	0007165 // signal transduction // inferred from electronic annotation /// 0007166 // cell surface receptor linked signal transduction // inferred from electronic annotation /// 0007186 // G-protein coupled receptor protein signaling pathway // inferred from electronic annotation /// 0007218 // neuropeptide signaling pathway // inferred from electronic annotation	0005886 // plasma membrane // inferred from electronic annotation /// 0016020 // membrane // inferred from electronic annotation /// 0016021 // integral to membrane // inferred from electronic annotation	0004871 // signal transducer activity // inferred from electronic annotation /// 0004872 // receptor activity // inferred from electronic annotation /// 0004888 // transmembrane receptor activity // inferred from electronic annotation /// 0004930 // G-protein coupled receptor activity // inferred from electronic annotation	G protein-coupled receptor 56
1416840_at	1.41271	up	Mid1ip1	68041	0007026 // negative regulation of microtubule depolymerization // inferred from genetic interaction	0005634 // nucleus // inferred from direct assay /// 0005634 // nucleus // inferred from electronic annotation /// 0005737 // cytoplasm // inferred from direct assay /// 0005737 // cytoplasm // inferred from electronic annotation /// 0005874 // microtubule // inferred from electronic annotation /// 0015630 // microtubule cytoskeleton // inferred from direct assay	0005515 // protein binding // inferred from physical interaction /// 0008022 // protein C-terminus binding // inferred from physical interaction	Mid1 interacting protein 1 (gastrulation specific G12-like (zebrafish))
1416799_at	1.4124	up	Trpm7	58800	0006468 // protein amino acid phosphorylation // inferred from direct assay /// 0006468 // protein amino acid phosphorylation // inferred from electronic annotation /// 0006810 // transport // inferred from electronic annotation /// 0006811 // ion transport // inferred from electronic annotation /// 0006816 // calcium ion transport // inferred from direct assay /// 0006816 // calcium ion transpor…	0001726 // ruffle // inferred from direct assay /// 0005886 // plasma membrane // inferred from direct assay /// 0016020 // membrane // inferred from electronic annotation /// 0016021 // integral to membrane // inferred from electronic annotation	0000166 // nucleotide binding // inferred from electronic annotation /// 0003779 // actin binding // inferred from direct assay /// 0004674 // protein serine/threonine kinase activity // inferred from electronic annotation /// 0004872 // receptor activity // inferred from electronic annotation /// 0005216 // ion channel activity // inferred from electronic annotation /// 0005262 // calcium channe…	transient receptor potential cation channel, subfamily M, member 7
1451906_at	1.41239	up	Ubxn10	212190				UBX domain protein 10
1434702_at	1.41	up	Ddrgk1	77006		0005576 // extracellular region // inferred from electronic annotation		DDRGK domain containing 1
1425627_x_at	1.40984	up	Gstm1	14862	0008152 // metabolic process // inferred from electronic annotation	0005737 // cytoplasm // inferred from electronic annotation	0004364 // glutathione transferase activity // inferred from electronic annotation /// 0016740 // transferase activity // inferred from electronic annotation	glutathione S-transferase, mu 1
1460061_at	1.40894	up
1453310_at	1.40883	up	Ppil6	73075	0006457 // protein folding // inferred from electronic annotation		0003755 // peptidyl-prolyl cis-trans isomerase activity // inferred from electronic annotation /// 0016853 // isomerase activity // inferred from electronic annotation	peptidylprolyl isomerase (cyclophilin)-like 6
1421835_at	1.40791	up	Mtap7	17761	0000902 // cell morphogenesis // inferred from mutant phenotype /// 0001578 // microtubule bundle formation // inferred from mutant phenotype /// 0006970 // response to osmotic stress // inferred from physical interaction /// 0006997 // nucleus organization // inferred from mutant phenotype /// 0007281 // germ cell development // inferred from mutant phenotype /// 0007283 // spermatogenesis // in…	0005737 // cytoplasm // inferred from electronic annotation /// 0005874 // microtubule // inferred from electronic annotation /// 0005886 // plasma membrane // inferred from direct assay /// 0005886 // plasma membrane // inferred from electronic annotation /// 0016020 // membrane // inferred from electronic annotation /// 0016323 // basolateral plasma membrane // inferred from electronic annotati…	0005515 // protein binding // inferred from physical interaction	microtubule-associated protein 7
1422788_at	1.40741	up	Slc43a3	58207		0016020 // membrane // inferred from electronic annotation /// 0016021 // integral to membrane // inferred from electronic annotation		solute carrier family 43, member 3
1445892_at	1.40654	up
1454037_a_at	1.40623	up	Flt1	14254	0001525 // angiogenesis // inferred from mutant phenotype /// 0001525 // angiogenesis // inferred from electronic annotation /// 0001569 // patterning of blood vessels // inferred from mutant phenotype /// 0006468 // protein amino acid phosphorylation // inferred from electronic annotation /// 0007169 // transmembrane receptor protein tyrosine kinase signaling pathway // inferred from electronic …	0016020 // membrane // inferred from electronic annotation /// 0016021 // integral to membrane // inferred from electronic annotation	0000166 // nucleotide binding // inferred from electronic annotation /// 0004672 // protein kinase activity // inferred from electronic annotation /// 0004713 // protein tyrosine kinase activity // inferred from electronic annotation /// 0004714 // transmembrane receptor protein tyrosine kinase activity // inferred from electronic annotation /// 0004872 // receptor activity // inferred from elect…	FMS-like tyrosine kinase 1
1435318_at	1.40535	up	E130218I03Rik	77490				RIKEN cDNA E130218I03 gene
1423375_at	1.40516	up	1700023B02Rik	66935	0000122 // negative regulation of transcription from RNA polymerase II promoter // not recorded /// 0006350 // transcription // inferred from electronic annotation /// 0006355 // regulation of transcription, DNA-dependent // inferred from electronic annotation /// 0006397 // mRNA processing // inferred from electronic annotation /// 0008380 // RNA splicing // inferred from electronic annotation	0005634 // nucleus // not recorded /// 0005634 // nucleus // inferred from electronic annotation /// 0016607 // nuclear speck // not recorded /// 0016607 // nuclear speck // inferred from electronic annotation	0005515 // protein binding // inferred from physical interaction /// 0016564 // transcription repressor activity // not recorded /// 0042826 // histone deacetylase binding // not recorded	RIKEN cDNA 1700023B02 gene
1452604_at	1.40431	up	Stard13	243362	0007049 // cell cycle // inferred from electronic annotation /// 0007165 // signal transduction // inferred from electronic annotation	0005622 // intracellular // inferred from electronic annotation /// 0005737 // cytoplasm // inferred from electronic annotation /// 0005739 // mitochondrion // inferred from electronic annotation /// 0005811 // lipid particle // inferred from electronic annotation /// 0016020 // membrane // inferred from electronic annotation /// 0031966 // mitochondrial membrane // inferred from electronic annot…	0005096 // GTPase activator activity // inferred from electronic annotation /// 0005515 // protein binding // inferred from electronic annotation	StAR-related lipid transfer (START) domain containing 13
1429736_at	1.40426	up	1110003F05Rik	66145				RIKEN cDNA 1110003F05 gene
1450971_at	1.40415	up	Gadd45b	17873	0000186 // activation of MAPKK activity // inferred from direct assay /// 0006469 // negative regulation of protein kinase activity // inferred from direct assay /// 0006915 // apoptosis // inferred from electronic annotation /// 0007275 // multicellular organismal development // inferred from electronic annotation /// 0030154 // cell differentiation // inferred from electronic annotation /// 005…	0005634 // nucleus // traceable author statement	0005515 // protein binding // inferred from physical interaction	growth arrest and DNA-damage-inducible 45 beta
1430168_at	1.40268	up	Cstad	78617	0007006 // mitochondrial membrane organization // inferred from direct assay	0005741 // mitochondrial outer membrane // inferred from direct assay		CSA-conditional, T cell activation-dependent protein
1448330_at	1.40264	up	Gstm1	14862	0008152 // metabolic process // inferred from electronic annotation	0005737 // cytoplasm // inferred from electronic annotation	0004364 // glutathione transferase activity // inferred from electronic annotation /// 0016740 // transferase activity // inferred from electronic annotation	glutathione S-transferase, mu 1
1450957_a_at	1.40246	up	Sqstm1	18412	0006915 // apoptosis // inferred from electronic annotation /// 0006955 // immune response // inferred from electronic annotation /// 0030154 // cell differentiation // inferred from electronic annotation /// 0043122 // regulation of I-kappaB kinase/NF-kappaB cascade // inferred from sequence or structural similarity	0005634 // nucleus // inferred from electronic annotation /// 0005737 // cytoplasm // inferred from electronic annotation /// 0005768 // endosome // inferred from electronic annotation /// 0005770 // late endosome // inferred from electronic annotation	0003712 // transcription cofactor activity // traceable author statement /// 0005515 // protein binding // inferred from physical interaction /// 0005515 // protein binding // inferred from sequence or structural similarity /// 0008270 // zinc ion binding // inferred from electronic annotation /// 0019901 // protein kinase binding // inferred from sequence or structural similarity /// 0042169 // …	sequestosome 1
1440016_at	1.4024	up
1429866_at	1.40163	up	Ahnak	66395		0005911 // cell-cell junction // inferred from sequence or structural similarity	0005515 // protein binding // inferred from electronic annotation	AHNAK nucleoprotein (desmoyokin)
1423094_at	1.40148	up	Crbn	58799	0006508 // proteolysis // inferred from electronic annotation	0005737 // cytoplasm // inferred from electronic annotation /// 0016020 // membrane // inferred from electronic annotation	0004176 // ATP-dependent peptidase activity // inferred from electronic annotation	cereblon
1458850_at	1.40103	up
1434866_x_at	1.40042	up	Cpt1a	12894	0006006 // glucose metabolic process // inferred from electronic annotation /// 0006629 // lipid metabolic process // inferred from electronic annotation /// 0006631 // fatty acid metabolic process // inferred from electronic annotation /// 0006810 // transport // inferred from electronic annotation /// 0042755 // eating behavior // inferred from electronic annotation /// 0050796 // regulation of…	0005739 // mitochondrion // inferred from direct assay /// 0005739 // mitochondrion // inferred from electronic annotation /// 0005741 // mitochondrial outer membrane // inferred from electronic annotation /// 0005743 // mitochondrial inner membrane // inferred from direct assay /// 0005792 // microsome // inferred from electronic annotation /// 0016020 // membrane // inferred from electronic ann…	0004095 // carnitine O-palmitoyltransferase activity // inferred from electronic annotation /// 0008415 // acyltransferase activity // inferred from electronic annotation /// 0016740 // transferase activity // inferred from electronic annotation	carnitine palmitoyltransferase 1a, liver
1429205_at	1.39998	up	Mllt3	70122	0006350 // transcription // inferred from electronic annotation /// 0006355 // regulation of transcription, DNA-dependent // inferred from electronic annotation /// 0007379 // segment specification // inferred from mutant phenotype /// 0009952 // anterior/posterior pattern formation // inferred from mutant phenotype	0005634 // nucleus // inferred from electronic annotation /// 0005737 // cytoplasm // inferred from electronic annotation	0005515 // protein binding // inferred from physical interaction	myeloid/lymphoid or mixed-lineage leukemia (trithorax homolog, Drosophila); translocated to, 3
1433557_at	1.39903	up	Cbx7	52609	0006333 // chromatin assembly or disassembly // inferred from electronic annotation /// 0006350 // transcription // inferred from electronic annotation /// 0006355 // regulation of transcription, DNA-dependent // inferred from electronic annotation /// 0016568 // chromatin modification // inferred from electronic annotation	0000785 // chromatin // inferred from electronic annotation /// 0005634 // nucleus // inferred from electronic annotation	0003682 // chromatin binding // inferred from electronic annotation	chromobox homolog 7
1457110_at	1.39804	up	Pank1	75735	0015937 // coenzyme A biosynthetic process // traceable author statement /// 0015937 // coenzyme A biosynthetic process // inferred from electronic annotation		0000166 // nucleotide binding // inferred from electronic annotation /// 0004594 // pantothenate kinase activity // inferred from direct assay /// 0004594 // pantothenate kinase activity // inferred from electronic annotation /// 0005524 // ATP binding // inferred from electronic annotation /// 0016301 // kinase activity // inferred from electronic annotation /// 0016740 // transferase activity /…	pantothenate kinase 1
1424155_at	1.39739	up	Fabp4	11770	0001816 // cytokine production // inferred from mutant phenotype /// 0006469 // negative regulation of protein kinase activity // inferred from mutant phenotype /// 0006631 // fatty acid metabolic process // inferred from electronic annotation /// 0006810 // transport // inferred from electronic annotation /// 0008284 // positive regulation of cell proliferation // inferred from electronic annota…	0005634 // nucleus // inferred from electronic annotation /// 0005737 // cytoplasm // inferred from electronic annotation /// 0005829 // cytosol // inferred from electronic annotation	0005215 // transporter activity // inferred from electronic annotation /// 0005488 // binding // inferred from electronic annotation /// 0005515 // protein binding // inferred from electronic annotation /// 0008289 // lipid binding // inferred from electronic annotation /// 0016564 // transcription repressor activity // inferred from mutant phenotype	fatty acid binding protein 4, adipocyte
1436033_at	1.39719	up	BC031353	235493				cDNA sequence BC031353
1434736_at	1.39667	up	Hlf	217082	0006350 // transcription // inferred from electronic annotation /// 0006355 // regulation of transcription, DNA-dependent // inferred from electronic annotation /// 0048511 // rhythmic process // inferred from electronic annotation	0005634 // nucleus // inferred from electronic annotation	0003677 // DNA binding // inferred from electronic annotation /// 0003700 // transcription factor activity // inferred from electronic annotation /// 0043565 // sequence-specific DNA binding // inferred from electronic annotation /// 0046983 // protein dimerization activity // inferred from electronic annotation	hepatic leukemia factor
1425809_at	1.39561	up	Fabp4	11770	0001816 // cytokine production // inferred from mutant phenotype /// 0006469 // negative regulation of protein kinase activity // inferred from mutant phenotype /// 0006631 // fatty acid metabolic process // inferred from electronic annotation /// 0006810 // transport // inferred from electronic annotation /// 0008284 // positive regulation of cell proliferation // inferred from electronic annota…	0005634 // nucleus // inferred from electronic annotation /// 0005737 // cytoplasm // inferred from electronic annotation /// 0005829 // cytosol // inferred from electronic annotation	0005215 // transporter activity // inferred from electronic annotation /// 0005488 // binding // inferred from electronic annotation /// 0005515 // protein binding // inferred from electronic annotation /// 0008289 // lipid binding // inferred from electronic annotation /// 0016564 // transcription repressor activity // inferred from mutant phenotype	fatty acid binding protein 4, adipocyte
1459238_at	1.39513	up
1424607_a_at	1.39447	up	100039204 /// 100040620 /// 100040790 /// 100041416 /// 100042151 /// 100043211 /// 100043316 /// Cwc22 /// LOC100047648 /// OTTMUSG00000017752	100039204 /// 100040620 /// 100040790 /// 100041416 /// 100042151 /// 100043211 /// 100043316 /// 100047648 /// 671950 /// 80744	0006397 // mRNA processing // inferred from electronic annotation /// 0008380 // RNA splicing // inferred from electronic annotation /// 0016070 // RNA metabolic process // inferred from electronic annotation	0005634 // nucleus // inferred from electronic annotation /// 0005681 // spliceosome // inferred from electronic annotation /// 0005681 // spliceosome // inferred from sequence or structural similarity	0003676 // nucleic acid binding // inferred from electronic annotation /// 0003723 // RNA binding // inferred from sequence or structural similarity /// 0005488 // binding // inferred from electronic annotation /// 0005515 // protein binding // inferred from electronic annotation /// 0008907 // integrase activity // inferred from electronic annotation	predicted gene, 100039204 /// predicted gene, 100040620 /// predicted gene, 100040790 /// predicted gene, 100041416 /// predicted gene, 100042151 /// predicted gene, 100043211 /// predicted gene, 100043316 /// CWC22 spliceosome-associated protein homolog (S. cerevisiae) /// hypothetical protein LOC100047648 /// predicted gene, OTTMUSG00000017752
1457035_at	1.39414	up	AI607873	226691			0005515 // protein binding // inferred from electronic annotation	expressed sequence AI607873
1434495_at	1.39396	up	Patz1	56218	0006355 // regulation of transcription, DNA-dependent // inferred from electronic annotation /// 0010468 // regulation of gene expression // inferred from direct assay /// 0016481 // negative regulation of transcription // inferred from sequence or structural similarity /// 0030217 // T cell differentiation // inferred from direct assay /// 0045449 // regulation of transcription // inferred from …	0005622 // intracellular // inferred from electronic annotation /// 0005634 // nucleus // inferred from direct assay /// 0005634 // nucleus // inferred from sequence or structural similarity	0003676 // nucleic acid binding // inferred from electronic annotation /// 0003677 // DNA binding // inferred from direct assay /// 0003677 // DNA binding // inferred from electronic annotation /// 0003682 // chromatin binding // inferred from direct assay /// 0005515 // protein binding // inferred from physical interaction /// 0005515 // protein binding // inferred from electronic annotation ///…	POZ (BTB) and AT hook containing zinc finger 1
1425694_at	1.39284	up	Tbx5	21388	0002009 // morphogenesis of an epithelium // inferred from mutant phenotype /// 0006350 // transcription // inferred from electronic annotation /// 0006355 // regulation of transcription, DNA-dependent // inferred from electronic annotation /// 0006917 // induction of apoptosis // inferred from sequence or structural similarity /// 0007267 // cell-cell signaling // inferred from sequence or struc…	0005634 // nucleus // inferred from direct assay /// 0005634 // nucleus // inferred from electronic annotation /// 0005634 // nucleus // inferred from sequence or structural similarity /// 0005737 // cytoplasm // inferred from sequence or structural similarity	0003677 // DNA binding // inferred from direct assay /// 0003677 // DNA binding // inferred from electronic annotation /// 0003677 // DNA binding // inferred from sequence or structural similarity /// 0003700 // transcription factor activity // inferred from direct assay /// 0003700 // transcription factor activity // inferred from electronic annotation /// 0003700 // transcription factor activit…	T-box 5
1443287_at	1.39211	up	Gm1337	383787				gene model 1337, (NCBI)
1449151_at	1.39156	up	Pctk3	18557	0006468 // protein amino acid phosphorylation // inferred from electronic annotation		0000166 // nucleotide binding // inferred from electronic annotation /// 0004672 // protein kinase activity // inferred from electronic annotation /// 0004674 // protein serine/threonine kinase activity // inferred from electronic annotation /// 0004693 // cyclin-dependent protein kinase activity // inferred from electronic annotation /// 0005515 // protein binding // inferred from electronic ann…	PCTAIRE-motif protein kinase 3
1427331_at	1.38978	up	Adora1	11539	0000186 // activation of MAPKK activity // inferred from electronic annotation /// 0001659 // temperature homeostasis // inferred from electronic annotation /// 0002087 // regulation of respiratory gaseous exchange by neurological process // inferred from electronic annotation /// 0002686 // negative regulation of leukocyte migration // inferred from genetic interaction /// 0002793 // positive re…	0005783 // endoplasmic reticulum // inferred from electronic annotation /// 0005886 // plasma membrane // inferred from electronic annotation /// 0012505 // endomembrane system // inferred from electronic annotation /// 0014069 // postsynaptic density // inferred from electronic annotation /// 0016020 // membrane // inferred from electronic annotation /// 0016021 // integral to membrane // inferr…	0001609 // adenosine receptor activity, G-protein coupled // inferred from electronic annotation /// 0001883 // purine nucleoside binding // inferred from electronic annotation /// 0004871 // signal transducer activity // inferred from electronic annotation /// 0004872 // receptor activity // inferred from electronic annotation /// 0004930 // G-protein coupled receptor activity // inferred from e…	adenosine A1 receptor
1429177_x_at	1.38978	up	Sox17	20671	0001525 // angiogenesis // inferred from genetic interaction /// 0001570 // vasculogenesis // inferred from genetic interaction /// 0006350 // transcription // inferred from electronic annotation /// 0006355 // regulation of transcription, DNA-dependent // inferred from electronic annotation /// 0030178 // negative regulation of Wnt receptor signaling pathway // inferred from mutant phenotype ///…	0005634 // nucleus // inferred from electronic annotation	0003677 // DNA binding // inferred from direct assay /// 0003677 // DNA binding // inferred from electronic annotation /// 0008013 // beta-catenin binding // inferred from electronic annotation /// 0008134 // transcription factor binding // inferred from electronic annotation	SRY-box containing gene 17
1417612_at	1.38676	up	Ier5	15939				immediate early response 5
1419017_at	1.38673	up	Corin	53419	0006508 // proteolysis // inferred from electronic annotation /// 0030182 // neuron differentiation // not recorded	0009986 // cell surface // inferred from direct assay /// 0016020 // membrane // inferred from electronic annotation /// 0016021 // integral to membrane // inferred from electronic annotation	0003824 // catalytic activity // inferred from electronic annotation /// 0004252 // serine-type endopeptidase activity // inferred from electronic annotation /// 0005044 // scavenger receptor activity // inferred from electronic annotation /// 0008233 // peptidase activity // inferred from electronic annotation /// 0008236 // serine-type peptidase activity // inferred from electronic annotation /…	corin
1436499_at	1.38621	up	Sgms1	208449	0006629 // lipid metabolic process // inferred from electronic annotation /// 0006665 // sphingolipid metabolic process // inferred from electronic annotation /// 0006686 // sphingomyelin biosynthetic process // inferred from sequence or structural similarity /// 0006686 // sphingomyelin biosynthetic process // inferred from electronic annotation /// 0006915 // apoptosis // inferred from electron…	0000138 // Golgi trans cisterna // not recorded /// 0000138 // Golgi trans cisterna // inferred from electronic annotation /// 0000139 // Golgi membrane // inferred from electronic annotation /// 0005634 // nucleus // traceable author statement /// 0005783 // endoplasmic reticulum // traceable author statement /// 0005794 // Golgi apparatus // inferred from electronic annotation /// 0005886 // pl…	0005515 // protein binding // inferred from electronic annotation /// 0016301 // kinase activity // inferred from electronic annotation /// 0016740 // transferase activity // inferred from electronic annotation /// 0033188 // sphingomyelin synthase activity // inferred from mutant phenotype /// 0033188 // sphingomyelin synthase activity // inferred from electronic annotation /// 0047493 // cerami…	sphingomyelin synthase 1
1438033_at	1.38613	up	Tef	21685	0006350 // transcription // inferred from electronic annotation /// 0006355 // regulation of transcription, DNA-dependent // inferred from electronic annotation /// 0045944 // positive regulation of transcription from RNA polymerase II promoter // inferred from direct assay /// 0048511 // rhythmic process // inferred from electronic annotation	0005634 // nucleus // inferred by curator /// 0005634 // nucleus // inferred from electronic annotation	0003677 // DNA binding // inferred from electronic annotation /// 0003690 // double-stranded DNA binding // inferred from direct assay /// 0003700 // transcription factor activity // inferred from electronic annotation /// 0005515 // protein binding // inferred from physical interaction /// 0016563 // transcription activator activity // inferred from direct assay /// 0043565 // sequence-specific …	thyrotroph embryonic factor
1455093_a_at	1.3854	up	Ahsg	11625	0001503 // ossification // inferred from direct assay /// 0006953 // acute-phase response // inferred from electronic annotation /// 0006953 // acute-phase response // inferred from sequence or structural similarity /// 0008584 // male gonad development // inferred from electronic annotation /// 0021987 // cerebral cortex development // inferred from electronic annotation /// 0030308 // negative …	0005576 // extracellular region // inferred from electronic annotation /// 0005615 // extracellular space // inferred from electronic annotation /// 0031012 // extracellular matrix // inferred from electronic annotation	0004869 // cysteine-type endopeptidase inhibitor activity // inferred from electronic annotation /// 0030294 // receptor signaling protein tyrosine kinase inhibitor activity // inferred from electronic annotation	alpha-2-HS-glycoprotein
1449188_at	1.38535	up	Midn	59090	0006464 // protein modification process // inferred from electronic annotation	0005634 // nucleus // inferred from electronic annotation /// 0005730 // nucleolus // inferred from direct assay		midnolin
1427157_at	1.38408	up	Ccdc85a	216613				coiled-coil domain containing 85A
1437114_at	1.38062	up	A930001N09Rik	77128	0006355 // regulation of transcription, DNA-dependent // inferred from electronic annotation		0003700 // transcription factor activity // inferred from electronic annotation /// 0043565 // sequence-specific DNA binding // inferred from electronic annotation	RIKEN cDNA A930001N09 gene
1435744_at	1.38039	up	6720401G13Rik	103012				RIKEN cDNA 6720401G13 gene
1455056_at	1.3799	up	Lmo7	380928	0016337 // cell-cell adhesion // not recorded /// 0016337 // cell-cell adhesion // inferred from electronic annotation	0005913 // cell-cell adherens junction // not recorded /// 0005913 // cell-cell adherens junction // inferred from electronic annotation /// 0016324 // apical plasma membrane // not recorded /// 0016324 // apical plasma membrane // inferred from electronic annotation	0005515 // protein binding // inferred from electronic annotation /// 0008270 // zinc ion binding // inferred from electronic annotation /// 0042805 // actinin binding // not recorded /// 0042805 // actinin binding // inferred from electronic annotation /// 0046872 // metal ion binding // inferred from electronic annotation	LIM domain only 7
1427254_at	1.37954	up	Zfp445	235682	0006350 // transcription // inferred from electronic annotation /// 0006355 // regulation of transcription, DNA-dependent // inferred from electronic annotation	0005622 // intracellular // inferred from electronic annotation /// 0005634 // nucleus // inferred from electronic annotation	0003676 // nucleic acid binding // inferred from electronic annotation /// 0003677 // DNA binding // inferred from electronic annotation /// 0003700 // transcription factor activity // inferred from electronic annotation /// 0008270 // zinc ion binding // inferred from electronic annotation /// 0046872 // metal ion binding // inferred from electronic annotation	zinc finger protein 445
1427344_s_at	1.37912	up	Rasd2	75141	0007264 // small GTPase mediated signal transduction // inferred from electronic annotation /// 0007626 // locomotory behavior // inferred from mutant phenotype	0005622 // intracellular // inferred from electronic annotation /// 0005737 // cytoplasm // inferred from electronic annotation /// 0005886 // plasma membrane // inferred from electronic annotation /// 0016020 // membrane // inferred from electronic annotation	0000166 // nucleotide binding // inferred from electronic annotation /// 0005525 // GTP binding // not recorded /// 0005525 // GTP binding // inferred from electronic annotation	RASD family, member 2
1452474_a_at	1.37905	up	Art3	109979	0006471 // protein amino acid ADP-ribosylation // inferred from electronic annotation	0005886 // plasma membrane // inferred from electronic annotation /// 0016020 // membrane // inferred from electronic annotation /// 0031225 // anchored to membrane // inferred from electronic annotation	0003956 // NAD(P)+-protein-arginine ADP-ribosyltransferase activity // inferred from electronic annotation /// 0016740 // transferase activity // inferred from electronic annotation /// 0016757 // transferase activity, transferring glycosyl groups // inferred from electronic annotation	ADP-ribosyltransferase 3
1435529_at	1.37839	up	OTTMUSG00000016644	667373				predicted gene, OTTMUSG00000016644
1440825_s_at	1.37832	up	Ccdc28a /// LOC100045472	100045472 /// 215814				coiled-coil domain containing 28A /// similar to coiled-coil domain containing 28A
1417563_at	1.3783	up	Eif4ebp1	13685	0006417 // regulation of translation // inferred from electronic annotation /// 0006446 // regulation of translational initiation // traceable author statement /// 0008286 // insulin receptor signaling pathway // inferred from direct assay /// 0017148 // negative regulation of translation // inferred from electronic annotation /// 0045947 // negative regulation of translational initiation // infe…	0005737 // cytoplasm // inferred by curator	0005515 // protein binding // inferred from physical interaction /// 0005515 // protein binding // inferred from electronic annotation /// 0008190 // eukaryotic initiation factor 4E binding // inferred from physical interaction /// 0008190 // eukaryotic initiation factor 4E binding // inferred from electronic annotation /// 0030371 // translation repressor activity // traceable author statement	eukaryotic translation initiation factor 4E binding protein 1
1459183_at	1.37829	up
1425328_at	1.37687	up	Fam76a	230789				family with sequence similarity 76, member A
1416488_at	1.37557	up	Ccng2	12452	0007049 // cell cycle // inferred from electronic annotation /// 0007067 // mitosis // inferred from electronic annotation /// 0051301 // cell division // inferred from electronic annotation /// 0051726 // regulation of cell cycle // inferred from direct assay	0005634 // nucleus // inferred from electronic annotation /// 0005737 // cytoplasm // inferred from electronic annotation		cyclin G2
1421841_at	1.37526	up	Fgfr3	14184	0000165 // MAPKKK cascade // inferred from direct assay /// 0002009 // morphogenesis of an epithelium // inferred from mutant phenotype /// 0006468 // protein amino acid phosphorylation // inferred from electronic annotation /// 0008285 // negative regulation of cell proliferation // inferred from mutant phenotype /// 0008543 // fibroblast growth factor receptor signaling pathway // inferred from…	0005764 // lysosome // inferred from direct assay /// 0009898 // internal side of plasma membrane // inferred from direct assay /// 0016020 // membrane // inferred from electronic annotation /// 0016021 // integral to membrane // inferred from electronic annotation /// 0048471 // perinuclear region of cytoplasm // inferred from direct assay	0000166 // nucleotide binding // inferred from electronic annotation /// 0004672 // protein kinase activity // inferred from electronic annotation /// 0004713 // protein tyrosine kinase activity // inferred from electronic annotation /// 0004714 // transmembrane receptor protein tyrosine kinase activity // inferred from electronic annotation /// 0004872 // receptor activity // inferred from elect…	fibroblast growth factor receptor 3
1425678_a_at	1.37495	up	Snrk	20623	0006468 // protein amino acid phosphorylation // inferred from electronic annotation /// 0006468 // protein amino acid phosphorylation // inferred from sequence or structural similarity	0005634 // nucleus // inferred from electronic annotation /// 0005634 // nucleus // inferred from sequence or structural similarity	0000166 // nucleotide binding // inferred from electronic annotation /// 0000287 // magnesium ion binding // inferred from electronic annotation /// 0000287 // magnesium ion binding // inferred from sequence or structural similarity /// 0004672 // protein kinase activity // inferred from electronic annotation /// 0004674 // protein serine/threonine kinase activity // inferred from electronic anno…	SNF related kinase
1453309_at	1.37489	up	9330179D12Rik	77558				RIKEN cDNA 9330179D12 gene
1437285_at	1.37454	up	1110020G09Rik	68646	0008152 // metabolic process // inferred from electronic annotation	0005739 // mitochondrion // inferred from direct assay	0003951 // NAD+ kinase activity // inferred from electronic annotation	RIKEN cDNA 1110020G09 gene
1441326_at	1.37409	up	Cp	12870	0006810 // transport // inferred from electronic annotation /// 0006811 // ion transport // inferred from electronic annotation /// 0006825 // copper ion transport // inferred from electronic annotation /// 0007568 // aging // inferred from electronic annotation /// 0007584 // response to nutrient // inferred from electronic annotation /// 0055114 // oxidation reduction // inferred from electroni…	0005576 // extracellular region // inferred from electronic annotation /// 0005615 // extracellular space // inferred from direct assay /// 0046658 // anchored to plasma membrane // inferred from electronic annotation	0004322 // ferroxidase activity // inferred from direct assay /// 0004322 // ferroxidase activity // inferred from electronic annotation /// 0005507 // copper ion binding // inferred from direct assay /// 0005507 // copper ion binding // inferred from electronic annotation /// 0016491 // oxidoreductase activity // inferred from electronic annotation /// 0046872 // metal ion binding // inferred fr…	ceruloplasmin
1416416_x_at	1.37399	up	Gstm1	14862	0008152 // metabolic process // inferred from electronic annotation	0005737 // cytoplasm // inferred from electronic annotation	0004364 // glutathione transferase activity // inferred from electronic annotation /// 0016740 // transferase activity // inferred from electronic annotation	glutathione S-transferase, mu 1
1428547_at	1.37349	up	Nt5e	23959	0006164 // purine nucleotide biosynthetic process // inferred from electronic annotation /// 0006196 // AMP catabolic process // inferred from mutant phenotype /// 0009166 // nucleotide catabolic process // inferred from electronic annotation /// 0046086 // adenosine biosynthetic process // inferred from mutant phenotype /// 0050728 // negative regulation of inflammatory response // inferred from…	0005624 // membrane fraction // inferred from direct assay /// 0005886 // plasma membrane // inferred from electronic annotation /// 0016020 // membrane // inferred from electronic annotation /// 0031225 // anchored to membrane // inferred from electronic annotation	0000166 // nucleotide binding // inferred from electronic annotation /// 0008198 // ferrous iron binding // inferred from electronic annotation /// 0008253 // 5'-nucleotidase activity // inferred from mutant phenotype /// 0008253 // 5'-nucleotidase activity // inferred from electronic annotation /// 0008270 // zinc ion binding // inferred from electronic annotation /// 0016787 // hydrolase activi…	5' nucleotidase, ecto
1431050_at	1.37339	up	Rps6ka5	73086	0006355 // regulation of transcription, DNA-dependent // inferred from direct assay /// 0006355 // regulation of transcription, DNA-dependent // inferred from electronic annotation /// 0006468 // protein amino acid phosphorylation // inferred from electronic annotation /// 0006468 // protein amino acid phosphorylation // inferred from direct assay /// 0006950 // response to stress // inferred fro…	0005634 // nucleus // inferred from direct assay /// 0005634 // nucleus // inferred from electronic annotation	0000166 // nucleotide binding // inferred from electronic annotation /// 0000287 // magnesium ion binding // inferred from electronic annotation /// 0004672 // protein kinase activity // inferred from electronic annotation /// 0004674 // protein serine/threonine kinase activity // inferred from direct assay /// 0004674 // protein serine/threonine kinase activity // inferred from electronic annota…	ribosomal protein S6 kinase, polypeptide 5
1458644_at	1.37145	up	Ccdc62	208908				coiled-coil domain containing 62
1424913_at	1.37122	up	2310044G17Rik	217732		0005634 // nucleus // inferred from electronic annotation /// 0005737 // cytoplasm // inferred from electronic annotation		RIKEN cDNA 2310044G17 gene
1448607_at	1.36981	up	Nampt	59027	0009435 // NAD biosynthetic process // inferred from direct assay /// 0019363 // pyridine nucleotide biosynthetic process // inferred from electronic annotation	0005737 // cytoplasm // inferred from direct assay /// 0005737 // cytoplasm // inferred from electronic annotation	0016740 // transferase activity // inferred from electronic annotation /// 0016757 // transferase activity, transferring glycosyl groups // inferred from electronic annotation /// 0047280 // nicotinamide phosphoribosyltransferase activity // inferred from direct assay /// 0047280 // nicotinamide phosphoribosyltransferase activity // inferred from electronic annotation	nicotinamide phosphoribosyltransferase
1417310_at	1.3695	up	Tob2	57259	0010468 // regulation of gene expression // inferred from mutant phenotype /// 0045671 // negative regulation of osteoclast differentiation // inferred from mutant phenotype /// 0045778 // positive regulation of ossification // inferred from mutant phenotype		0042809 // vitamin D receptor binding // inferred from physical interaction	transducer of ERBB2, 2
1436216_s_at	1.36825	up	2610204M08Rik	70435	0016043 // cellular component organization // inferred from electronic annotation /// 0030036 // actin cytoskeleton organization // inferred from electronic annotation		0003779 // actin binding // inferred from electronic annotation /// 0017048 // Rho GTPase binding // inferred from electronic annotation	RIKEN cDNA 2610204M08 gene
1416344_at	1.36737	up	Lamp2	16784		0005624 // membrane fraction // not recorded /// 0005764 // lysosome // inferred from direct assay /// 0005764 // lysosome // not recorded /// 0005764 // lysosome // inferred from electronic annotation /// 0005765 // lysosomal membrane // not recorded /// 0005765 // lysosomal membrane // inferred from electronic annotation /// 0005768 // endosome // inferred from electronic annotation /// 0005770…		lysosomal-associated membrane protein 2
1449405_at	1.36735	up	Tns1	21961	0007044 // cell-substrate junction assembly // inferred from mutant phenotype /// 0016477 // cell migration // inferred from mutant phenotype	0005925 // focal adhesion // inferred from direct assay /// 0030055 // cell-substrate junction // inferred from direct assay	0003779 // actin binding // traceable author statement /// 0005515 // protein binding // inferred from electronic annotation	tensin 1
1456629_at	1.36723	up	Kank3	80880	0051497 // negative regulation of stress fiber formation // not recorded	0005737 // cytoplasm // not recorded		KN motif and ankyrin repeat domains 3
1450492_at	1.36704	up	Cngb3	30952	0006810 // transport // inferred from electronic annotation /// 0006811 // ion transport // inferred from electronic annotation /// 0007601 // visual perception // inferred from electronic annotation /// 0009187 // cyclic nucleotide metabolic process // inferred by curator /// 0050896 // response to stimulus // inferred from electronic annotation	0001750 // photoreceptor outer segment // inferred from direct assay /// 0005886 // plasma membrane // inferred by curator /// 0016020 // membrane // inferred from electronic annotation /// 0016021 // integral to membrane // inferred from electronic annotation	0000166 // nucleotide binding // inferred from electronic annotation /// 0005216 // ion channel activity // inferred from electronic annotation /// 0005223 // intracellular cGMP activated cation channel activity // inferred from physical interaction /// 0005515 // protein binding // inferred from physical interaction /// 0030553 // cGMP binding // inferred by curator /// 0030553 // cGMP binding /…	cyclic nucleotide gated channel beta 3
1430837_a_at	1.36678	up	Mbd1	17190	0006306 // DNA methylation // traceable author statement /// 0006350 // transcription // inferred from electronic annotation /// 0006355 // regulation of transcription, DNA-dependent // inferred from electronic annotation	0000785 // chromatin // inferred from direct assay /// 0000792 // heterochromatin // inferred from direct assay /// 0005634 // nucleus // inferred from direct assay /// 0005634 // nucleus // inferred from electronic annotation /// 0005730 // nucleolus // inferred from direct assay /// 0005737 // cytoplasm // inferred from direct assay /// 0016607 // nuclear speck // inferred from electronic annot…	0003677 // DNA binding // inferred from direct assay /// 0003677 // DNA binding // inferred from electronic annotation /// 0008270 // zinc ion binding // inferred from electronic annotation /// 0046872 // metal ion binding // inferred from electronic annotation	methyl-CpG binding domain protein 1
1433711_s_at	1.36669	up	LOC100047324 /// Sesn1	100047324 /// 140742	0007050 // cell cycle arrest // inferred from electronic annotation	0005634 // nucleus // inferred from electronic annotation		similar to Sesn1 protein /// sestrin 1
1428835_at	1.3661	up	Myh14	71960	0008360 // regulation of cell shape // inferred from electronic annotation /// 0030048 // actin filament-based movement // inferred from direct assay	0001725 // stress fiber // inferred from direct assay /// 0005737 // cytoplasm // inferred from direct assay /// 0016459 // myosin complex // inferred from direct assay /// 0016459 // myosin complex // inferred from electronic annotation /// 0030424 // axon // inferred from direct assay /// 0030426 // growth cone // inferred from direct assay	0000146 // microfilament motor activity // inferred from direct assay /// 0000166 // nucleotide binding // inferred from electronic annotation /// 0003774 // motor activity // inferred from electronic annotation /// 0003779 // actin binding // inferred from electronic annotation /// 0005516 // calmodulin binding // inferred from electronic annotation /// 0005524 // ATP binding // inferred from di…	myosin, heavy polypeptide 14
1450759_at	1.36426	up	Bmp6	12161	0001503 // ossification // inferred from electronic annotation /// 0001649 // osteoblast differentiation // inferred from genetic interaction /// 0006954 // inflammatory response // inferred from expression pattern /// 0006955 // immune response // inferred from electronic annotation /// 0007275 // multicellular organismal development // inferred from electronic annotation /// 0030154 // cell dif…	0005576 // extracellular region // inferred from electronic annotation /// 0005615 // extracellular space // inferred from electronic annotation	0005125 // cytokine activity // inferred from electronic annotation /// 0005515 // protein binding // inferred from physical interaction /// 0008083 // growth factor activity // inferred from electronic annotation	bone morphogenetic protein 6
1418498_at	1.36339	up	Fgf13	14168	0000165 // MAPKKK cascade // not recorded /// 0000165 // MAPKKK cascade // inferred from electronic annotation	0005634 // nucleus // not recorded /// 0005634 // nucleus // inferred from electronic annotation /// 0005737 // cytoplasm // not recorded /// 0005737 // cytoplasm // inferred from electronic annotation	0005515 // protein binding // not recorded /// 0005515 // protein binding // inferred from electronic annotation /// 0008083 // growth factor activity // inferred from electronic annotation /// 0030295 // protein kinase activator activity // not recorded /// 0030295 // protein kinase activator activity // inferred from electronic annotation	fibroblast growth factor 13
1423845_at	1.36326	up	Csdc2	105859	0006355 // regulation of transcription, DNA-dependent // inferred from electronic annotation /// 0006397 // mRNA processing // inferred from electronic annotation	0005634 // nucleus // inferred from electronic annotation /// 0005737 // cytoplasm // inferred from electronic annotation /// 0005794 // Golgi apparatus // inferred from electronic annotation	0003676 // nucleic acid binding // inferred from electronic annotation /// 0003677 // DNA binding // inferred from electronic annotation /// 0003723 // RNA binding // inferred from electronic annotation	cold shock domain containing C2, RNA binding
1418092_s_at	1.36282	up	Trip10	106628	0006897 // endocytosis // inferred from electronic annotation	0005737 // cytoplasm // inferred from electronic annotation /// 0005764 // lysosome // inferred from electronic annotation /// 0005794 // Golgi apparatus // inferred from electronic annotation /// 0005856 // cytoskeleton // inferred from electronic annotation /// 0005874 // microtubule // traceable author statement /// 0005886 // plasma membrane // inferred from electronic annotation /// 0016020 …	0005515 // protein binding // inferred from physical interaction /// 0008289 // lipid binding // inferred from electronic annotation	thyroid hormone receptor interactor 10
1424609_a_at	1.36276	up	100039204 /// 100040620 /// 100040790 /// 100041416 /// 100042151 /// 100042613 /// 100043211 /// 100043316 /// Cwc22 /// LOC100047648 /// OTTMUSG00000017752	100039204 /// 100040620 /// 100040790 /// 100041416 /// 100042151 /// 100042613 /// 100043211 /// 100043316 /// 100047648 /// 671950 /// 80744	0006397 // mRNA processing // inferred from electronic annotation /// 0008380 // RNA splicing // inferred from electronic annotation /// 0016070 // RNA metabolic process // inferred from electronic annotation	0005634 // nucleus // inferred from electronic annotation /// 0005681 // spliceosome // inferred from electronic annotation /// 0005681 // spliceosome // inferred from sequence or structural similarity	0003676 // nucleic acid binding // inferred from electronic annotation /// 0003723 // RNA binding // inferred from sequence or structural similarity /// 0005488 // binding // inferred from electronic annotation /// 0005515 // protein binding // inferred from electronic annotation /// 0008907 // integrase activity // inferred from electronic annotation	predicted gene, 100039204 /// predicted gene, 100040620 /// predicted gene, 100040790 /// predicted gene, 100041416 /// predicted gene, 100042151 /// predicted gene, 100042613 /// predicted gene, 100043211 /// predicted gene, 100043316 /// CWC22 spliceosome-associated protein homolog (S. cerevisiae) /// hypothetical protein LOC100047648 /// predicted gene, OTTMUSG00000017752
1420088_at	1.36263	up	Nfkbia	18035	0000060 // protein import into nucleus, translocation // inferred from direct assay /// 0031663 // lipopolysaccharide-mediated signaling pathway // inferred from direct assay /// 0032495 // response to muramyl dipeptide // inferred from direct assay /// 0032496 // response to lipopolysaccharide // inferred from direct assay /// 0034142 // toll-like receptor 4 signaling pathway // inferred from di…	0005634 // nucleus // inferred from direct assay /// 0005634 // nucleus // inferred from electronic annotation /// 0005737 // cytoplasm // inferred from direct assay /// 0005737 // cytoplasm // inferred from electronic annotation /// 0005829 // cytosol // inferred from direct assay	0005515 // protein binding // inferred from physical interaction /// 0008139 // nuclear localization sequence binding // inferred from electronic annotation /// 0031625 // ubiquitin protein ligase binding // inferred from electronic annotation /// 0042802 // identical protein binding // inferred from electronic annotation /// 0051059 // NF-kappaB binding // inferred from electronic annotation	nuclear factor of kappa light polypeptide gene enhancer in B-cells inhibitor, alpha
1435658_at	1.36213	up	Slc27a1	26457	0001676 // long-chain fatty acid metabolic process // traceable author statement /// 0006629 // lipid metabolic process // inferred from electronic annotation /// 0006631 // fatty acid metabolic process // inferred from electronic annotation /// 0006810 // transport // inferred from electronic annotation /// 0006869 // lipid transport // inferred from electronic annotation /// 0008152 // metaboli…	0005737 // cytoplasm // inferred from electronic annotation /// 0005886 // plasma membrane // traceable author statement /// 0005886 // plasma membrane // inferred from electronic annotation /// 0012505 // endomembrane system // inferred from electronic annotation /// 0016020 // membrane // inferred from electronic annotation /// 0016021 // integral to membrane // inferred from electronic annotat…	0000166 // nucleotide binding // inferred from electronic annotation /// 0003824 // catalytic activity // inferred from electronic annotation /// 0004467 // long-chain-fatty-acid-CoA ligase activity // traceable author statement /// 0005215 // transporter activity // inferred from electronic annotation /// 0005488 // binding // inferred from electronic annotation /// 0016874 // ligase activity //…	solute carrier family 27 (fatty acid transporter), member 1
1428375_at	1.36209	up	4932415G12Rik	67723				RIKEN cDNA 4932415G12 gene
1455665_at	1.36172	up	LOC631639 /// Lonrf1	244421 /// 631639	0006508 // proteolysis // inferred from electronic annotation		0004176 // ATP-dependent peptidase activity // inferred from electronic annotation /// 0005515 // protein binding // inferred from electronic annotation /// 0008270 // zinc ion binding // inferred from electronic annotation	similar to CG32369-PB, isoform B /// LON peptidase N-terminal domain and ring finger 1
1455486_at	1.36167	up	Pias1	56469	0006350 // transcription // inferred from electronic annotation /// 0006355 // regulation of transcription, DNA-dependent // inferred from electronic annotation /// 0007259 // JAK-STAT cascade // not recorded /// 0019941 // modification-dependent protein catabolic process // inferred from electronic annotation	0005634 // nucleus // inferred from electronic annotation /// 0016607 // nuclear speck // inferred from electronic annotation	0003676 // nucleic acid binding // inferred from electronic annotation /// 0003677 // DNA binding // inferred from electronic annotation /// 0003714 // transcription corepressor activity // not recorded /// 0005515 // protein binding // inferred from electronic annotation /// 0008270 // zinc ion binding // inferred from electronic annotation /// 0046872 // metal ion binding // inferred from elect…	protein inhibitor of activated STAT 1
1428389_s_at	1.36164	up	Wdr43	72515		0005634 // nucleus // inferred from electronic annotation		WD repeat domain 43
1418290_a_at	1.36108	up	Ezh1	14055	0006350 // transcription // inferred from electronic annotation /// 0006355 // regulation of transcription, DNA-dependent // inferred from electronic annotation /// 0016568 // chromatin modification // inferred from electronic annotation	0005634 // nucleus // inferred from direct assay /// 0005634 // nucleus // inferred from electronic annotation	0003677 // DNA binding // inferred from electronic annotation /// 0005515 // protein binding // inferred from physical interaction /// 0008168 // methyltransferase activity // inferred from electronic annotation /// 0016740 // transferase activity // inferred from electronic annotation /// 0018024 // histone-lysine N-methyltransferase activity // inferred from electronic annotation	enhancer of zeste homolog 1 (Drosophila)
1446656_at	1.361	up
1437286_x_at	1.36082	up	1110020G09Rik	68646	0008152 // metabolic process // inferred from electronic annotation	0005739 // mitochondrion // inferred from direct assay	0003951 // NAD+ kinase activity // inferred from electronic annotation	RIKEN cDNA 1110020G09 gene
1440511_at	1.36076	up
1435361_at	1.36075	up	Sema3g	218877	0007275 // multicellular organismal development // inferred from electronic annotation	0005576 // extracellular region // inferred from electronic annotation /// 0016020 // membrane // inferred from electronic annotation	0004872 // receptor activity // inferred from electronic annotation	sema domain, immunoglobulin domain (Ig), short basic domain, secreted, (semaphorin) 3G
1427932_s_at	1.36024	up	1200003I10Rik /// 1200015M12Rik /// 1200016E24Rik /// A130040M12Rik /// E430024C06Rik	319202 /// 319269 /// 319443 /// 71719 /// 71739				RIKEN cDNA 1200003I10 gene /// RIKEN cDNA 1200015M12 gene /// RIKEN cDNA 1200016E24 gene /// RIKEN cDNA A130040M12 gene /// RIKEN cDNA E430024C06 gene
1456412_a_at	1.36009	up	Inpp5k	19062		0001726 // ruffle // not recorded /// 0005624 // membrane fraction // not recorded /// 0005783 // endoplasmic reticulum // not recorded /// 0005783 // endoplasmic reticulum // inferred from electronic annotation /// 0005829 // cytosol // inferred from electronic annotation /// 0005829 // cytosol // inferred from sequence or structural similarity /// 0043005 // neuron projection // inferred from e…	0004437 // inositol or phosphatidylinositol phosphatase activity // not recorded /// 0004437 // inositol or phosphatidylinositol phosphatase activity // inferred from electronic annotation /// 0004445 // inositol-polyphosphate 5-phosphatase activity // inferred from electronic annotation /// 0005515 // protein binding // inferred from electronic annotation /// 0016312 // inositol bisphosphate pho…	inositol polyphosphate 5-phosphatase K
1456406_at	1.35861	up	OTTMUSG00000018617	100008567				predicted gene, OTTMUSG00000018617
1435034_at	1.35859	up	Rpap2	231571		0016020 // membrane // inferred from electronic annotation /// 0016021 // integral to membrane // inferred from electronic annotation		RNA polymerase II associated protein 2
1449544_a_at	1.35835	up	Kcnh2 /// LOC100047076	100047076 /// 16511	0000160 // two-component signal transduction system (phosphorelay) // inferred from electronic annotation /// 0006355 // regulation of transcription, DNA-dependent // inferred from electronic annotation /// 0006810 // transport // inferred from electronic annotation /// 0006811 // ion transport // inferred from electronic annotation /// 0006813 // potassium ion transport // inferred from electron…	0005635 // nuclear envelope // inferred from direct assay /// 0005737 // cytoplasm // inferred from direct assay /// 0005886 // plasma membrane // inferred from direct assay /// 0005887 // integral to plasma membrane // inferred from electronic annotation /// 0016020 // membrane // inferred from electronic annotation /// 0016021 // integral to membrane // inferred from electronic annotation	0000155 // two-component sensor activity // inferred from electronic annotation /// 0004871 // signal transducer activity // inferred from electronic annotation /// 0005216 // ion channel activity // inferred from electronic annotation /// 0005242 // inward rectifier potassium channel activity // inferred from electronic annotation /// 0005244 // voltage-gated ion channel activity // inferred fro…	potassium voltage-gated channel, subfamily H (eag-related), member 2 /// similar to potassium channel erg1a
1438156_x_at	1.35833	up	Cpt1a	12894	0006006 // glucose metabolic process // inferred from electronic annotation /// 0006629 // lipid metabolic process // inferred from electronic annotation /// 0006631 // fatty acid metabolic process // inferred from electronic annotation /// 0006810 // transport // inferred from electronic annotation /// 0042755 // eating behavior // inferred from electronic annotation /// 0050796 // regulation of…	0005739 // mitochondrion // inferred from direct assay /// 0005739 // mitochondrion // inferred from electronic annotation /// 0005741 // mitochondrial outer membrane // inferred from electronic annotation /// 0005743 // mitochondrial inner membrane // inferred from direct assay /// 0005792 // microsome // inferred from electronic annotation /// 0016020 // membrane // inferred from electronic ann…	0004095 // carnitine O-palmitoyltransferase activity // inferred from electronic annotation /// 0008415 // acyltransferase activity // inferred from electronic annotation /// 0016740 // transferase activity // inferred from electronic annotation	carnitine palmitoyltransferase 1a, liver
1451566_at	1.35803	up	Zfp810	235050	0006350 // transcription // inferred from electronic annotation /// 0006355 // regulation of transcription, DNA-dependent // inferred from electronic annotation	0005622 // intracellular // inferred from electronic annotation /// 0005634 // nucleus // inferred from electronic annotation	0003676 // nucleic acid binding // inferred from electronic annotation /// 0008270 // zinc ion binding // inferred from electronic annotation /// 0046872 // metal ion binding // inferred from electronic annotation	zinc finger protein 810
1446619_at	1.35655	up	A130038J17Rik	320628				RIKEN cDNA A130038J17 gene
1429435_x_at	1.35608	up	Pik3ca	18706	0006006 // glucose metabolic process // inferred from mutant phenotype /// 0006468 // protein amino acid phosphorylation // inferred from direct assay /// 0006916 // anti-apoptosis // inferred from mutant phenotype /// 0007165 // signal transduction // inferred from electronic annotation /// 0040014 // regulation of multicellular organism growth // inferred from mutant phenotype /// 0043066 // ne…	0005737 // cytoplasm // inferred from electronic annotation /// 0005739 // mitochondrion // inferred from electronic annotation /// 0005942 // phosphoinositide 3-kinase complex // inferred from physical interaction /// 0005942 // phosphoinositide 3-kinase complex // inferred from electronic annotation /// 0030027 // lamellipodium // inferred from direct assay	0000166 // nucleotide binding // inferred from electronic annotation /// 0004428 // inositol or phosphatidylinositol kinase activity // inferred from electronic annotation /// 0005488 // binding // inferred from electronic annotation /// 0005515 // protein binding // inferred from electronic annotation /// 0005515 // protein binding // inferred from physical interaction /// 0005524 // ATP binding…	phosphatidylinositol 3-kinase, catalytic, alpha polypeptide
1432136_s_at	1.35435	up	Zdhhc4	72881		0016020 // membrane // inferred from electronic annotation /// 0016021 // integral to membrane // inferred from electronic annotation	0008270 // zinc ion binding // inferred from electronic annotation /// 0008415 // acyltransferase activity // inferred from electronic annotation /// 0016740 // transferase activity // inferred from electronic annotation /// 0046872 // metal ion binding // inferred from electronic annotation	zinc finger, DHHC domain containing 4
1418497_at	1.35369	up	Fgf13	14168	0000165 // MAPKKK cascade // not recorded /// 0000165 // MAPKKK cascade // inferred from electronic annotation	0005634 // nucleus // not recorded /// 0005634 // nucleus // inferred from electronic annotation /// 0005737 // cytoplasm // not recorded /// 0005737 // cytoplasm // inferred from electronic annotation	0005515 // protein binding // not recorded /// 0005515 // protein binding // inferred from electronic annotation /// 0008083 // growth factor activity // inferred from electronic annotation /// 0030295 // protein kinase activator activity // not recorded /// 0030295 // protein kinase activator activity // inferred from electronic annotation	fibroblast growth factor 13
1418128_at	1.35338	up	Adcy6	11512	0006171 // cAMP biosynthetic process // traceable author statement /// 0006171 // cAMP biosynthetic process // inferred from electronic annotation /// 0007190 // activation of adenylate cyclase activity // traceable author statement /// 0007242 // intracellular signaling cascade // inferred from electronic annotation /// 0009190 // cyclic nucleotide biosynthetic process // inferred from electroni…	0005886 // plasma membrane // traceable author statement /// 0016020 // membrane // inferred from electronic annotation /// 0016021 // integral to membrane // inferred from electronic annotation	0000166 // nucleotide binding // inferred from electronic annotation /// 0000287 // magnesium ion binding // inferred from electronic annotation /// 0004016 // adenylate cyclase activity // traceable author statement /// 0004016 // adenylate cyclase activity // inferred from electronic annotation /// 0005524 // ATP binding // inferred from electronic annotation /// 0016829 // lyase activity // in…	adenylate cyclase 6
1426575_at	1.35258	up	Sgms1	208449	0006629 // lipid metabolic process // inferred from electronic annotation /// 0006665 // sphingolipid metabolic process // inferred from electronic annotation /// 0006686 // sphingomyelin biosynthetic process // inferred from sequence or structural similarity /// 0006686 // sphingomyelin biosynthetic process // inferred from electronic annotation /// 0006915 // apoptosis // inferred from electron…	0000138 // Golgi trans cisterna // not recorded /// 0000138 // Golgi trans cisterna // inferred from electronic annotation /// 0000139 // Golgi membrane // inferred from electronic annotation /// 0005634 // nucleus // traceable author statement /// 0005783 // endoplasmic reticulum // traceable author statement /// 0005794 // Golgi apparatus // inferred from electronic annotation /// 0005886 // pl…	0005515 // protein binding // inferred from electronic annotation /// 0016301 // kinase activity // inferred from electronic annotation /// 0016740 // transferase activity // inferred from electronic annotation /// 0033188 // sphingomyelin synthase activity // inferred from mutant phenotype /// 0033188 // sphingomyelin synthase activity // inferred from electronic annotation /// 0047493 // cerami…	sphingomyelin synthase 1
1449029_at	1.35255	up	Mknk2	17347	0006417 // regulation of translation // inferred from electronic annotation /// 0006468 // protein amino acid phosphorylation // inferred from direct assay /// 0006468 // protein amino acid phosphorylation // inferred from electronic annotation /// 0006950 // response to stress // inferred from electronic annotation /// 0007243 // protein kinase cascade // inferred from direct assay		0000166 // nucleotide binding // inferred from electronic annotation /// 0000287 // magnesium ion binding // inferred from electronic annotation /// 0004672 // protein kinase activity // inferred from electronic annotation /// 0004674 // protein serine/threonine kinase activity // inferred from direct assay /// 0004674 // protein serine/threonine kinase activity // inferred from electronic annota…	MAP kinase-interacting serine/threonine kinase 2
1433795_at	1.35249	up	Tgfbr3	21814	0001568 // blood vessel development // inferred from mutant phenotype /// 0001701 // in utero embryonic development // inferred from mutant phenotype /// 0001824 // blastocyst development // inferred from direct assay /// 0001889 // liver development // inferred from mutant phenotype /// 0007179 // transforming growth factor beta receptor signaling pathway // inferred from direct assay /// 001063…	0005576 // extracellular region // inferred from electronic annotation /// 0005578 // proteinaceous extracellular matrix // inferred from electronic annotation /// 0005737 // cytoplasm // inferred from direct assay /// 0005783 // endoplasmic reticulum // inferred from direct assay /// 0005886 // plasma membrane // inferred from electronic annotation /// 0009986 // cell surface // inferred from di…	0004872 // receptor activity // inferred from electronic annotation /// 0005024 // transforming growth factor beta receptor activity // inferred from direct assay /// 0005024 // transforming growth factor beta receptor activity // inferred from mutant phenotype /// 0005515 // protein binding // inferred from physical interaction /// 0005539 // glycosaminoglycan binding // inferred from direct ass…	transforming growth factor, beta receptor III
1419435_at	1.35189	up	Aox1	11761	0055114 // oxidation reduction // inferred from electronic annotation	0005737 // cytoplasm // inferred from electronic annotation	0003824 // catalytic activity // inferred from electronic annotation /// 0004031 // aldehyde oxidase activity // inferred from direct assay /// 0004031 // aldehyde oxidase activity // inferred from electronic annotation /// 0005506 // iron ion binding // inferred from electronic annotation /// 0009055 // electron carrier activity // inferred from electronic annotation /// 0009055 // electron carr…	aldehyde oxidase 1
1424381_at	1.35173	up	Sf4	70616	0006396 // RNA processing // inferred from electronic annotation /// 0006397 // mRNA processing // inferred from electronic annotation /// 0008380 // RNA splicing // inferred from electronic annotation	0005622 // intracellular // inferred from electronic annotation /// 0005634 // nucleus // inferred from electronic annotation /// 0005681 // spliceosome // inferred from electronic annotation	0003676 // nucleic acid binding // inferred from electronic annotation /// 0003723 // RNA binding // inferred from electronic annotation	splicing factor 4
1427171_at	1.35138	up	Rlf	109263		0005622 // intracellular // inferred from electronic annotation	0005515 // protein binding // inferred from electronic annotation /// 0008270 // zinc ion binding // inferred from electronic annotation	rearranged L-myc fusion sequence
1433634_at	1.35123	up	Irf2bp2	270110	0000122 // negative regulation of transcription from RNA polymerase II promoter // not recorded	0005634 // nucleus // not recorded	0003714 // transcription corepressor activity // not recorded /// 0005515 // protein binding // not recorded	interferon regulatory factor 2 binding protein 2
1437410_at	1.3509	up	Aldh2	11669	0008152 // metabolic process // inferred from electronic annotation /// 0055114 // oxidation reduction // inferred from electronic annotation	0005739 // mitochondrion // inferred from direct assay /// 0005739 // mitochondrion // inferred from electronic annotation /// 0005759 // mitochondrial matrix // inferred from electronic annotation	0004029 // aldehyde dehydrogenase (NAD) activity // inferred from electronic annotation /// 0016491 // oxidoreductase activity // inferred from electronic annotation	aldehyde dehydrogenase 2, mitochondrial
1449852_a_at	1.34983	up	Ehd4	98878		0005768 // endosome // inferred from electronic annotation /// 0005783 // endoplasmic reticulum // inferred from electronic annotation /// 0016020 // membrane // inferred from electronic annotation /// 0031901 // early endosome membrane // inferred from electronic annotation /// 0055038 // recycling endosome membrane // inferred from electronic annotation	0000166 // nucleotide binding // inferred from electronic annotation /// 0003924 // GTPase activity // inferred from electronic annotation /// 0005509 // calcium ion binding // inferred from electronic annotation /// 0005515 // protein binding // inferred from physical interaction /// 0005515 // protein binding // inferred from electronic annotation /// 0005524 // ATP binding // inferred from ele…	EH-domain containing 4
1426471_at	1.34963	up	Zfp52	22710	0006350 // transcription // inferred from electronic annotation /// 0006355 // regulation of transcription, DNA-dependent // inferred from electronic annotation	0005622 // intracellular // inferred from electronic annotation /// 0005634 // nucleus // inferred from electronic annotation	0003676 // nucleic acid binding // inferred from electronic annotation /// 0008270 // zinc ion binding // inferred from electronic annotation /// 0046872 // metal ion binding // inferred from electronic annotation	zinc finger protein 52
1416511_a_at	1.34915	up	Cdc42ep4	56699	0007266 // Rho protein signal transduction // inferred from direct assay /// 0008360 // regulation of cell shape // inferred from electronic annotation /// 0031274 // positive regulation of pseudopodium assembly // inferred from electronic annotation	0005737 // cytoplasm // inferred from direct assay /// 0005737 // cytoplasm // inferred from electronic annotation /// 0005856 // cytoskeleton // inferred from electronic annotation /// 0012505 // endomembrane system // inferred from electronic annotation /// 0016020 // membrane // inferred from electronic annotation	0005515 // protein binding // inferred from physical interaction	CDC42 effector protein (Rho GTPase binding) 4
1455320_at	1.34903	up
1433965_at	1.34841	up	Atp8a1	11980	0006754 // ATP biosynthetic process // inferred from electronic annotation /// 0008152 // metabolic process // inferred from electronic annotation /// 0015914 // phospholipid transport // inferred from electronic annotation	0016020 // membrane // inferred from electronic annotation /// 0016021 // integral to membrane // inferred from electronic annotation /// 0031410 // cytoplasmic vesicle // inferred from electronic annotation	0000166 // nucleotide binding // inferred from electronic annotation /// 0000287 // magnesium ion binding // inferred from electronic annotation /// 0003824 // catalytic activity // inferred from electronic annotation /// 0004012 // phospholipid-translocating ATPase activity // inferred from electronic annotation /// 0005524 // ATP binding // inferred from electronic annotation /// 0015662 // ATP…	ATPase, aminophospholipid transporter (APLT), class I, type 8A, member 1
1418300_a_at	1.34816	up	Mknk2	17347	0006417 // regulation of translation // inferred from electronic annotation /// 0006468 // protein amino acid phosphorylation // inferred from direct assay /// 0006468 // protein amino acid phosphorylation // inferred from electronic annotation /// 0006950 // response to stress // inferred from electronic annotation /// 0007243 // protein kinase cascade // inferred from direct assay		0000166 // nucleotide binding // inferred from electronic annotation /// 0000287 // magnesium ion binding // inferred from electronic annotation /// 0004672 // protein kinase activity // inferred from electronic annotation /// 0004674 // protein serine/threonine kinase activity // inferred from direct assay /// 0004674 // protein serine/threonine kinase activity // inferred from electronic annota…	MAP kinase-interacting serine/threonine kinase 2
1423086_at	1.3477	up	Npc1	18145	0006897 // endocytosis // inferred from mutant phenotype /// 0007041 // lysosomal transport // inferred from mutant phenotype /// 0007041 // lysosomal transport // inferred from sequence or structural similarity /// 0008206 // bile acid metabolic process // inferred from mutant phenotype /// 0008206 // bile acid metabolic process // inferred from sequence or structural similarity /// 0016242 // n…	0005635 // nuclear envelope // inferred from electronic annotation /// 0005635 // nuclear envelope // inferred from sequence or structural similarity /// 0005764 // lysosome // inferred from electronic annotation /// 0005765 // lysosomal membrane // inferred from electronic annotation /// 0005768 // endosome // inferred from direct assay /// 0005768 // endosome // inferred from electronic annotat…	0005515 // protein binding // inferred from physical interaction /// 0005515 // protein binding // inferred from electronic annotation /// 0008158 // hedgehog receptor activity // inferred from electronic annotation	Niemann Pick type C1
1437475_at	1.34769	up	BC028454	407833				cDNA sequence BC028454
1426334_a_at	1.34712	up	Bcl2l11	12125	0001701 // in utero embryonic development // inferred from genetic interaction /// 0001776 // leukocyte homeostasis // inferred from genetic interaction /// 0001776 // leukocyte homeostasis // inferred from mutant phenotype /// 0001782 // B cell homeostasis // inferred from genetic interaction /// 0001782 // B cell homeostasis // inferred from mutant phenotype /// 0001783 // B cell apoptosis // i…	0000300 // peripheral to membrane of membrane fraction // inferred from direct assay /// 0005737 // cytoplasm // inferred from direct assay /// 0005739 // mitochondrion // inferred from direct assay /// 0005739 // mitochondrion // inferred from electronic annotation /// 0016020 // membrane // inferred from electronic annotation /// 0043231 // intracellular membrane-bounded organelle // inferred f…	0005515 // protein binding // inferred from physical interaction /// 0005515 // protein binding // inferred from electronic annotation /// 0008017 // microtubule binding // inferred from direct assay	BCL2-like 11 (apoptosis facilitator)
1425536_at	1.34662	up	Stx3	20908	0006810 // transport // inferred from electronic annotation /// 0006836 // neurotransmitter transport // inferred from electronic annotation /// 0006886 // intracellular protein transport // inferred from electronic annotation /// 0016192 // vesicle-mediated transport // inferred from electronic annotation	0016020 // membrane // inferred from electronic annotation /// 0016021 // integral to membrane // inferred from electronic annotation	0005484 // SNAP receptor activity // inferred from electronic annotation /// 0005515 // protein binding // inferred from electronic annotation	syntaxin 3
1437260_at	1.34635	up	Mmrn1	70945		0005576 // extracellular region // inferred from electronic annotation		multimerin 1
1446069_at	1.34617	up
1430023_at	1.34591	up	5133400G04Rik	71242	0007275 // multicellular organismal development // inferred from electronic annotation /// 0007283 // spermatogenesis // inferred from electronic annotation /// 0030154 // cell differentiation // inferred from electronic annotation	0005737 // cytoplasm // inferred from electronic annotation		RIKEN cDNA 5133400G04 gene
1428834_at	1.3458	up	Dusp4	319520	0006470 // protein amino acid dephosphorylation // inferred from electronic annotation /// 0016311 // dephosphorylation // inferred from electronic annotation	0005634 // nucleus // inferred from electronic annotation	0004721 // phosphoprotein phosphatase activity // inferred from electronic annotation /// 0004725 // protein tyrosine phosphatase activity // inferred from electronic annotation /// 0008138 // protein tyrosine/serine/threonine phosphatase activity // inferred from electronic annotation /// 0016787 // hydrolase activity // inferred from electronic annotation /// 0016791 // phosphatase activity // …	dual specificity phosphatase 4
1448839_at	1.34575	up	Kank3	80880	0051497 // negative regulation of stress fiber formation // not recorded	0005737 // cytoplasm // not recorded		KN motif and ankyrin repeat domains 3
1449013_at	1.34542	up	Eef2k	13631	0006468 // protein amino acid phosphorylation // inferred from electronic annotation		0000166 // nucleotide binding // inferred from electronic annotation /// 0004674 // protein serine/threonine kinase activity // inferred from electronic annotation /// 0004686 // elongation factor-2 kinase activity // inferred from electronic annotation /// 0005488 // binding // inferred from electronic annotation /// 0005509 // calcium ion binding // inferred from electronic annotation /// 00055…	eukaryotic elongation factor-2 kinase
1457435_x_at	1.34519	up	Myom2	17930	0006936 // muscle contraction // inferred from physical interaction	0005634 // nucleus // inferred from electronic annotation /// 0005737 // cytoplasm // inferred from electronic annotation /// 0005739 // mitochondrion // inferred from electronic annotation /// 0005856 // cytoskeleton // traceable author statement	0005200 // structural constituent of cytoskeleton // traceable author statement	myomesin 2
1433508_at	1.3448	up	Klf6	23849	0006350 // transcription // inferred from electronic annotation /// 0006355 // regulation of transcription, DNA-dependent // inferred from electronic annotation /// 0019221 // cytokine-mediated signaling pathway // inferred from direct assay	0005622 // intracellular // inferred from electronic annotation /// 0005634 // nucleus // inferred from direct assay /// 0005634 // nucleus // inferred from electronic annotation /// 0005737 // cytoplasm // inferred from direct assay	0003676 // nucleic acid binding // inferred from electronic annotation /// 0003677 // DNA binding // inferred from sequence or structural similarity /// 0003677 // DNA binding // inferred from electronic annotation /// 0008270 // zinc ion binding // inferred from electronic annotation /// 0046872 // metal ion binding // inferred from electronic annotation	Kruppel-like factor 6
1451147_x_at	1.34474	up	Csdc2	105859	0006355 // regulation of transcription, DNA-dependent // inferred from electronic annotation /// 0006397 // mRNA processing // inferred from electronic annotation	0005634 // nucleus // inferred from electronic annotation /// 0005737 // cytoplasm // inferred from electronic annotation /// 0005794 // Golgi apparatus // inferred from electronic annotation	0003676 // nucleic acid binding // inferred from electronic annotation /// 0003677 // DNA binding // inferred from electronic annotation /// 0003723 // RNA binding // inferred from electronic annotation	cold shock domain containing C2, RNA binding
1438964_x_at	1.34441	up	Tfpt	69714	0006917 // induction of apoptosis // not recorded	0005634 // nucleus // not recorded /// 0005634 // nucleus // inferred from electronic annotation	0005515 // protein binding // not recorded /// 0046982 // protein heterodimerization activity // not recorded	TCF3 (E2A) fusion partner
1448705_at	1.34423	up	Zbtb22	81630	0006350 // transcription // inferred from electronic annotation /// 0006355 // regulation of transcription, DNA-dependent // inferred from electronic annotation	0005622 // intracellular // inferred from electronic annotation /// 0005634 // nucleus // inferred from electronic annotation	0003676 // nucleic acid binding // inferred from electronic annotation /// 0003677 // DNA binding // inferred from electronic annotation /// 0004886 // retinoid-X receptor activity // inferred from electronic annotation /// 0005515 // protein binding // inferred from electronic annotation /// 0008270 // zinc ion binding // inferred from electronic annotation /// 0030375 // thyroid hormone recepto…	zinc finger and BTB domain containing 22
1425557_x_at	1.3439	up	Tsc22d3	14605	0006355 // regulation of transcription, DNA-dependent // inferred from electronic annotation /// 0006916 // anti-apoptosis // inferred from direct assay /// 0006970 // response to osmotic stress // inferred from direct assay		0003700 // transcription factor activity // inferred from electronic annotation	TSC22 domain family, member 3
1460662_at	1.34343	up	Per3	18628	0006350 // transcription // inferred from electronic annotation /// 0006355 // regulation of transcription, DNA-dependent // inferred from electronic annotation /// 0007165 // signal transduction // inferred from electronic annotation /// 0007623 // circadian rhythm // inferred from direct assay /// 0048511 // rhythmic process // inferred from electronic annotation	0005634 // nucleus // inferred from electronic annotation /// 0005737 // cytoplasm // inferred from electronic annotation	0004871 // signal transducer activity // inferred from electronic annotation	period homolog 3 (Drosophila)
1449741_at	1.34306	up	Dsg2	13511	0007155 // cell adhesion // inferred from electronic annotation /// 0007156 // homophilic cell adhesion // inferred from electronic annotation	0005886 // plasma membrane // inferred from electronic annotation /// 0016020 // membrane // inferred from electronic annotation /// 0016021 // integral to membrane // inferred from electronic annotation /// 0030054 // cell junction // inferred from electronic annotation /// 0030057 // desmosome // inferred from direct assay /// 0031965 // nuclear membrane // inferred from electronic annotation	0005509 // calcium ion binding // inferred from electronic annotation /// 0005515 // protein binding // inferred from electronic annotation	Desmoglein 2 (Dsg2), mRNA
1437924_at	1.34189	up	Son	20658		0005622 // intracellular // inferred from electronic annotation /// 0005634 // nucleus // inferred from electronic annotation	0003676 // nucleic acid binding // inferred from electronic annotation /// 0003677 // DNA binding // inferred from electronic annotation /// 0003723 // RNA binding // inferred from electronic annotation /// 0003725 // double-stranded RNA binding // inferred from electronic annotation /// 0005515 // protein binding // inferred from physical interaction /// 0050733 // RS domain binding // inferred …	Son DNA binding protein
1418280_at	1.34137	up	Klf6	23849	0006350 // transcription // inferred from electronic annotation /// 0006355 // regulation of transcription, DNA-dependent // inferred from electronic annotation /// 0019221 // cytokine-mediated signaling pathway // inferred from direct assay	0005622 // intracellular // inferred from electronic annotation /// 0005634 // nucleus // inferred from direct assay /// 0005634 // nucleus // inferred from electronic annotation /// 0005737 // cytoplasm // inferred from direct assay	0003676 // nucleic acid binding // inferred from electronic annotation /// 0003677 // DNA binding // inferred from sequence or structural similarity /// 0003677 // DNA binding // inferred from electronic annotation /// 0008270 // zinc ion binding // inferred from electronic annotation /// 0046872 // metal ion binding // inferred from electronic annotation	Kruppel-like factor 6
1448555_at	1.34097	up	Rpap3	71919			0005488 // binding // inferred from electronic annotation	RNA polymerase II associated protein 3
1429410_at	1.34039	up	Eny2	223527	0006350 // transcription // inferred from electronic annotation /// 0006355 // regulation of transcription, DNA-dependent // inferred from electronic annotation /// 0006810 // transport // inferred from electronic annotation /// 0016568 // chromatin modification // inferred from electronic annotation /// 0045893 // positive regulation of transcription, DNA-dependent // inferred from sequence or s…	0000124 // SAGA complex // inferred from sequence or structural similarity /// 0005634 // nucleus // inferred from electronic annotation	0003713 // transcription coactivator activity // inferred from sequence or structural similarity /// 0030374 // ligand-dependent nuclear receptor transcription coactivator activity // inferred from sequence or structural similarity	enhancer of yellow 2 homolog (Drosophila)
1426230_at	1.33997	up	Sphk2	56632	0001568 // blood vessel development // inferred from genetic interaction /// 0006669 // sphinganine-1-phosphate biosynthetic process // non-traceable author statement /// 0006670 // sphingosine metabolic process // inferred from mutant phenotype /// 0006916 // anti-apoptosis // non-traceable author statement /// 0007205 // activation of protein kinase C activity by G-protein coupled receptor prot…	0005624 // membrane fraction // inferred from direct assay /// 0005829 // cytosol // inferred from direct assay	0000166 // nucleotide binding // inferred from electronic annotation /// 0004143 // diacylglycerol kinase activity // inferred from electronic annotation /// 0005515 // protein binding // inferred from physical interaction /// 0005524 // ATP binding // inferred from electronic annotation /// 0008481 // sphinganine kinase activity // non-traceable author statement /// 0008481 // sphinganine kinase…	sphingosine kinase 2
1451804_a_at	1.33936	up	Lrrc16a	68732		0005737 // cytoplasm // inferred from electronic annotation		leucine rich repeat containing 16A
1430418_at	1.33933	up	Tmem57	66146		0005634 // nucleus // inferred from direct assay /// 0016020 // membrane // inferred from electronic annotation /// 0016021 // integral to membrane // inferred from electronic annotation		transmembrane protein 57
1448864_at	1.33899	up	Snrk	20623	0006468 // protein amino acid phosphorylation // inferred from electronic annotation /// 0006468 // protein amino acid phosphorylation // inferred from sequence or structural similarity	0005634 // nucleus // inferred from electronic annotation /// 0005634 // nucleus // inferred from sequence or structural similarity	0000166 // nucleotide binding // inferred from electronic annotation /// 0000287 // magnesium ion binding // inferred from electronic annotation /// 0000287 // magnesium ion binding // inferred from sequence or structural similarity /// 0004672 // protein kinase activity // inferred from electronic annotation /// 0004674 // protein serine/threonine kinase activity // inferred from electronic anno…	SNF related kinase
1417815_a_at	1.33894	up	Serinc3	26943	0006917 // induction of apoptosis // inferred from direct assay	0000139 // Golgi membrane // inferred from electronic annotation /// 0005794 // Golgi apparatus // inferred from direct assay /// 0005794 // Golgi apparatus // inferred from electronic annotation /// 0005886 // plasma membrane // inferred from direct assay /// 0005886 // plasma membrane // inferred from electronic annotation /// 0016020 // membrane // inferred from electronic annotation /// 00160…	0005515 // protein binding // inferred from electronic annotation	serine incorporator 3
1448334_a_at	1.3389	up	Ccni	12453	0051726 // regulation of cell cycle // traceable author statement		0016538 // cyclin-dependent protein kinase regulator activity // inferred from sequence or structural similarity	cyclin I
1440742_at	1.3388	up
1436977_at	1.33828	up
1437204_a_at	1.33802	up	Tcf25	66855	0000122 // negative regulation of transcription from RNA polymerase II promoter // inferred from sequence or structural similarity /// 0006350 // transcription // inferred from electronic annotation /// 0006355 // regulation of transcription, DNA-dependent // inferred from electronic annotation	0005634 // nucleus // inferred from direct assay /// 0005634 // nucleus // inferred from electronic annotation	0003677 // DNA binding // inferred from electronic annotation /// 0003700 // transcription factor activity // inferred from sequence or structural similarity	transcription factor 25 (basic helix-loop-helix)
1438805_at	1.3379	up	Ccnd3	12445	0007049 // cell cycle // inferred from electronic annotation /// 0007165 // signal transduction // inferred from direct assay /// 0042098 // T cell proliferation // inferred from mutant phenotype /// 0051301 // cell division // inferred from electronic annotation /// 0051726 // regulation of cell cycle // inferred from direct assay	0005634 // nucleus // inferred from electronic annotation /// 0005737 // cytoplasm // inferred from electronic annotation	0004693 // cyclin-dependent protein kinase activity // inferred from direct assay /// 0005515 // protein binding // inferred from physical interaction	cyclin D3
1426576_at	1.33731	up	Sgms1	208449	0006629 // lipid metabolic process // inferred from electronic annotation /// 0006665 // sphingolipid metabolic process // inferred from electronic annotation /// 0006686 // sphingomyelin biosynthetic process // inferred from sequence or structural similarity /// 0006686 // sphingomyelin biosynthetic process // inferred from electronic annotation /// 0006915 // apoptosis // inferred from electron…	0000138 // Golgi trans cisterna // not recorded /// 0000138 // Golgi trans cisterna // inferred from electronic annotation /// 0000139 // Golgi membrane // inferred from electronic annotation /// 0005634 // nucleus // traceable author statement /// 0005783 // endoplasmic reticulum // traceable author statement /// 0005794 // Golgi apparatus // inferred from electronic annotation /// 0005886 // pl…	0005515 // protein binding // inferred from electronic annotation /// 0016301 // kinase activity // inferred from electronic annotation /// 0016740 // transferase activity // inferred from electronic annotation /// 0033188 // sphingomyelin synthase activity // inferred from mutant phenotype /// 0033188 // sphingomyelin synthase activity // inferred from electronic annotation /// 0047493 // cerami…	sphingomyelin synthase 1
1436146_at	1.33716	up	4930481A15Rik	74931				RIKEN cDNA 4930481A15 gene
1454974_at	1.33672	up	Ntn1	18208	0001764 // neuron migration // inferred from mutant phenotype /// 0006915 // apoptosis // inferred from electronic annotation /// 0007409 // axonogenesis // inferred from direct assay /// 0007411 // axon guidance // inferred from direct assay /// 0007411 // axon guidance // inferred from mutant phenotype /// 0008284 // positive regulation of cell proliferation // inferred from mutant phenotype //…	0005576 // extracellular region // inferred from electronic annotation /// 0005578 // proteinaceous extracellular matrix // inferred from electronic annotation /// 0005604 // basement membrane // inferred from direct assay /// 0005737 // cytoplasm // inferred from direct assay	0005515 // protein binding // inferred from physical interaction /// 0005515 // protein binding // inferred from electronic annotation	netrin 1
1422470_at	1.33669	up	Bnip3	12176	0001666 // response to hypoxia // inferred from sequence or structural similarity /// 0006309 // DNA fragmentation involved in apoptosis // inferred from electronic annotation /// 0006309 // DNA fragmentation involved in apoptosis // inferred from sequence or structural similarity /// 0006338 // chromatin remodeling // inferred from electronic annotation /// 0006338 // chromatin remodeling // inf…	0005634 // nucleus // inferred from sequence or structural similarity /// 0005635 // nuclear envelope // inferred from electronic annotation /// 0005635 // nuclear envelope // inferred from sequence or structural similarity /// 0005654 // nucleoplasm // inferred from sequence or structural similarity /// 0005737 // cytoplasm // inferred from sequence or structural similarity /// 0005739 // mitoch…	0042803 // protein homodimerization activity // inferred from electronic annotation /// 0046982 // protein heterodimerization activity // inferred from electronic annotation	BCL2/adenovirus E1B interacting protein 3
1446626_at	1.3362	up	D16H22S680E	27883				DNA segment, Chr 16, human D22S680E, expressed
1434303_at	1.33606	up	Raph1	77300				Ras association (RalGDS/AF-6) and pleckstrin homology domains 1
1433869_at	1.33596	up	Zxdc	80292	0006350 // transcription // inferred from electronic annotation /// 0006355 // regulation of transcription, DNA-dependent // inferred from electronic annotation	0005622 // intracellular // inferred from electronic annotation /// 0005634 // nucleus // inferred from electronic annotation	0003676 // nucleic acid binding // inferred from electronic annotation /// 0008270 // zinc ion binding // inferred from electronic annotation /// 0042802 // identical protein binding // inferred from electronic annotation /// 0046872 // metal ion binding // inferred from electronic annotation	ZXD family zinc finger C
1430318_at	1.33559	up	Sat2	69215	0008152 // metabolic process // inferred from electronic annotation /// 0008215 // spermine metabolic process // not recorded /// 0008216 // spermidine metabolic process // not recorded		0004145 // diamine N-acetyltransferase activity // not recorded /// 0004145 // diamine N-acetyltransferase activity // inferred from electronic annotation /// 0008080 // N-acetyltransferase activity // inferred from electronic annotation /// 0008415 // acyltransferase activity // inferred from electronic annotation /// 0016740 // transferase activity // inferred from electronic annotation	spermidine/spermine N1-acetyl transferase 2
1435991_at	1.33496	up	Nr3c2	110784	0006350 // transcription // inferred from electronic annotation /// 0006355 // regulation of transcription, DNA-dependent // inferred from electronic annotation /// 0006883 // cellular sodium ion homeostasis // inferred from mutant phenotype /// 0007588 // excretion // inferred from mutant phenotype	0005634 // nucleus // inferred from electronic annotation /// 0005737 // cytoplasm // inferred from electronic annotation /// 0005783 // endoplasmic reticulum // inferred from electronic annotation /// 0005789 // endoplasmic reticulum membrane // inferred from electronic annotation /// 0016020 // membrane // inferred from electronic annotation	0003677 // DNA binding // inferred from electronic annotation /// 0003700 // transcription factor activity // inferred from electronic annotation /// 0003707 // steroid hormone receptor activity // inferred from electronic annotation /// 0004872 // receptor activity // inferred from electronic annotation /// 0004879 // ligand-dependent nuclear receptor activity // inferred from electronic annotat…	nuclear receptor subfamily 3, group C, member 2
1453817_at	1.3349	up	Abca6	76184	0006810 // transport // inferred from electronic annotation	0016020 // membrane // inferred from electronic annotation /// 0016021 // integral to membrane // inferred from electronic annotation	0000166 // nucleotide binding // inferred from electronic annotation /// 0005524 // ATP binding // inferred from electronic annotation /// 0016887 // ATPase activity // inferred from electronic annotation /// 0017111 // nucleoside-triphosphatase activity // inferred from electronic annotation	ATP-binding cassette, sub-family A (ABC1), member 6
1416433_at	1.33484	up	Rpa2	19891	0006260 // DNA replication // inferred from electronic annotation	0005634 // nucleus // inferred from electronic annotation /// 0005662 // DNA replication factor A complex // not recorded	0003676 // nucleic acid binding // inferred from electronic annotation	replication protein A2
1424034_at	1.33437	up	Rora	19883	0006350 // transcription // inferred from electronic annotation /// 0006355 // regulation of transcription, DNA-dependent // inferred from direct assay /// 0006355 // regulation of transcription, DNA-dependent // inferred from electronic annotation /// 0006809 // nitric oxide biosynthetic process // inferred from mutant phenotype /// 0021702 // cerebellar Purkinje cell differentiation // inferred…	0005634 // nucleus // inferred from electronic annotation	0003677 // DNA binding // inferred from direct assay /// 0003677 // DNA binding // inferred from electronic annotation /// 0003700 // transcription factor activity // inferred from direct assay /// 0003700 // transcription factor activity // not recorded /// 0003700 // transcription factor activity // inferred from electronic annotation /// 0003707 // steroid hormone receptor activity // inferred…	RAR-related orphan receptor alpha
1452519_a_at	1.33432	up	Zfp36	22695	0000288 // nuclear-transcribed mRNA catabolic process, deadenylation-dependent decay // inferred from direct assay /// 0000289 // nuclear-transcribed mRNA poly(A) tail shortening // inferred from direct assay /// 0006402 // mRNA catabolic process // not recorded /// 0006402 // mRNA catabolic process // inferred from electronic annotation /// 0007243 // protein kinase cascade // inferred from dire…	0005634 // nucleus // inferred from direct assay /// 0005634 // nucleus // inferred from electronic annotation /// 0005737 // cytoplasm // inferred from direct assay /// 0005829 // cytosol // inferred from direct assay /// 0005829 // cytosol // not recorded /// 0005829 // cytosol // inferred from electronic annotation	0003676 // nucleic acid binding // inferred from electronic annotation /// 0003677 // DNA binding // inferred from electronic annotation /// 0003729 // mRNA binding // inferred from direct assay /// 0003729 // mRNA binding // not recorded /// 0003729 // mRNA binding // inferred from electronic annotation /// 0005515 // protein binding // inferred from electronic annotation /// 0008270 // zinc ion…	zinc finger protein 36
1456351_at	1.334	up	Brd8	78656	0006350 // transcription // inferred from electronic annotation /// 0006355 // regulation of transcription, DNA-dependent // inferred from electronic annotation /// 0016568 // chromatin modification // inferred from electronic annotation /// 0040008 // regulation of growth // inferred from electronic annotation	0005634 // nucleus // inferred from electronic annotation		bromodomain containing 8
1441328_at	1.33392	up
1449023_a_at	1.33385	up	Ezh1	14055	0006350 // transcription // inferred from electronic annotation /// 0006355 // regulation of transcription, DNA-dependent // inferred from electronic annotation /// 0016568 // chromatin modification // inferred from electronic annotation	0005634 // nucleus // inferred from direct assay /// 0005634 // nucleus // inferred from electronic annotation	0003677 // DNA binding // inferred from electronic annotation /// 0005515 // protein binding // inferred from physical interaction /// 0008168 // methyltransferase activity // inferred from electronic annotation /// 0016740 // transferase activity // inferred from electronic annotation /// 0018024 // histone-lysine N-methyltransferase activity // inferred from electronic annotation	enhancer of zeste homolog 1 (Drosophila)
1446148_x_at	1.33384	up	Rbm39	170791	0006350 // transcription // traceable author statement /// 0006350 // transcription // inferred from electronic annotation /// 0006355 // regulation of transcription, DNA-dependent // inferred from electronic annotation /// 0006397 // mRNA processing // inferred from electronic annotation /// 0008380 // RNA splicing // inferred from electronic annotation	0005634 // nucleus // traceable author statement /// 0005634 // nucleus // inferred from electronic annotation /// 0005856 // cytoskeleton // inferred from electronic annotation	0000166 // nucleotide binding // inferred from electronic annotation /// 0003676 // nucleic acid binding // inferred from electronic annotation /// 0003713 // transcription coactivator activity // traceable author statement /// 0003723 // RNA binding // inferred from electronic annotation /// 0005515 // protein binding // inferred from physical interaction	RNA binding motif protein 39
1436737_a_at	1.33367	up	Sorbs1	20411	0006810 // transport // inferred from electronic annotation /// 0008286 // insulin receptor signaling pathway // inferred from direct assay /// 0008286 // insulin receptor signaling pathway // inferred by curator /// 0015758 // glucose transport // inferred from direct assay /// 0032869 // cellular response to insulin stimulus // inferred by curator /// 0032869 // cellular response to insulin sti…	0001725 // stress fiber // inferred from direct assay /// 0005634 // nucleus // inferred from sequence or structural similarity /// 0005737 // cytoplasm // inferred from electronic annotation /// 0005829 // cytosol // inferred from direct assay /// 0005856 // cytoskeleton // inferred from electronic annotation /// 0005886 // plasma membrane // inferred from electronic annotation /// 0005913 // ce…	0005070 // SH3/SH2 adaptor activity // inferred from physical interaction /// 0005158 // insulin receptor binding // inferred from direct assay /// 0005158 // insulin receptor binding // inferred from physical interaction /// 0005515 // protein binding // inferred from physical interaction /// 0019901 // protein kinase binding // inferred from direct assay	sorbin and SH3 domain containing 1
1427343_at	1.33351	up	Rasd2	75141	0007264 // small GTPase mediated signal transduction // inferred from electronic annotation /// 0007626 // locomotory behavior // inferred from mutant phenotype	0005622 // intracellular // inferred from electronic annotation /// 0005737 // cytoplasm // inferred from electronic annotation /// 0005886 // plasma membrane // inferred from electronic annotation /// 0016020 // membrane // inferred from electronic annotation	0000166 // nucleotide binding // inferred from electronic annotation /// 0005525 // GTP binding // not recorded /// 0005525 // GTP binding // inferred from electronic annotation	RASD family, member 2
1451355_at	1.33299	up	Acer2	230379	0006629 // lipid metabolic process // inferred from electronic annotation /// 0006672 // ceramide metabolic process // inferred from electronic annotation	0000139 // Golgi membrane // inferred from electronic annotation /// 0005789 // endoplasmic reticulum membrane // inferred from electronic annotation /// 0005794 // Golgi apparatus // inferred from electronic annotation /// 0016020 // membrane // inferred from electronic annotation /// 0016021 // integral to membrane // inferred from electronic annotation	0016787 // hydrolase activity // inferred from electronic annotation /// 0016811 // hydrolase activity, acting on carbon-nitrogen (but not peptide) bonds, in linear amides // inferred from electronic annotation /// 0017040 // ceramidase activity // inferred from electronic annotation	alkaline ceramidase 2
1448760_at	1.33272	up	Zfp68	24135	0006350 // transcription // inferred from electronic annotation /// 0006355 // regulation of transcription, DNA-dependent // inferred from electronic annotation	0005622 // intracellular // inferred from electronic annotation /// 0005634 // nucleus // inferred from electronic annotation	0003676 // nucleic acid binding // inferred from electronic annotation /// 0008270 // zinc ion binding // inferred from electronic annotation /// 0046872 // metal ion binding // inferred from electronic annotation	zinc finger protein 68
1460672_at	1.33258	up	2410002F23Rik	66976				RIKEN cDNA 2410002F23 gene
1452209_at	1.33247	up	Pkp4	227937	0007155 // cell adhesion // inferred from electronic annotation	0030054 // cell junction // inferred from electronic annotation	0005488 // binding // inferred from electronic annotation /// 0005515 // protein binding // inferred from electronic annotation	plakophilin 4
1437566_at	1.33232	up	LOC633966	633966				similar to guanine nucleotide binding protein-like 2 (nucleolar)
1429060_at	1.33188	up	Malat1	72289				metastasis associated lung adenocarcinoma transcript 1 (non-coding RNA)
1436538_at	1.33113	up	Ankrd37	654824		0005634 // nucleus // inferred from electronic annotation /// 0005737 // cytoplasm // inferred from electronic annotation		ankyrin repeat domain 37
1448196_at	1.33021	up	Mat2b	108645	0006556 // S-adenosylmethionine biosynthetic process // inferred from sequence or structural similarity /// 0006730 // one-carbon compound metabolic process // inferred from electronic annotation /// 0008152 // metabolic process // inferred from electronic annotation /// 0045226 // extracellular polysaccharide biosynthetic process // inferred from electronic annotation		0003824 // catalytic activity // inferred from electronic annotation /// 0005488 // binding // inferred from electronic annotation /// 0008831 // dTDP-4-dehydrorhamnose reductase activity // inferred from electronic annotation /// 0048270 // methionine adenosyltransferase regulator activity // inferred from sequence or structural similarity	methionine adenosyltransferase II, beta
1437143_a_at	1.3296	up	Tmx1	72736	0006810 // transport // inferred from electronic annotation /// 0006916 // anti-apoptosis // inferred from electronic annotation /// 0022900 // electron transport chain // inferred from electronic annotation /// 0045454 // cell redox homeostasis // inferred from electronic annotation	0005624 // membrane fraction // inferred from electronic annotation /// 0005634 // nucleus // inferred from electronic annotation /// 0005783 // endoplasmic reticulum // inferred from electronic annotation /// 0005789 // endoplasmic reticulum membrane // inferred from electronic annotation /// 0016020 // membrane // inferred from electronic annotation /// 0016021 // integral to membrane // inferr…	0015036 // disulfide oxidoreductase activity // inferred from electronic annotation	thioredoxin-related transmembrane protein 1
1420535_a_at	1.32941	up	Nub1	53312		0005634 // nucleus // inferred from electronic annotation	0005488 // binding // inferred from electronic annotation	negative regulator of ubiquitin-like proteins 1
1434440_at	1.32864	up	Gnai1	14677	0007165 // signal transduction // inferred from electronic annotation /// 0007186 // G-protein coupled receptor protein signaling pathway // traceable author statement /// 0007186 // G-protein coupled receptor protein signaling pathway // inferred from electronic annotation	0005622 // intracellular // inferred from direct assay	0000166 // nucleotide binding // inferred from electronic annotation /// 0003924 // GTPase activity // traceable author statement /// 0004871 // signal transducer activity // inferred from electronic annotation /// 0005515 // protein binding // inferred from electronic annotation /// 0005525 // GTP binding // inferred from electronic annotation /// 0019001 // guanyl nucleotide binding // inferred…	guanine nucleotide binding protein (G protein), alpha inhibiting 1
1457337_at	1.32855	up
1425463_at	1.32806	up	Gata6	14465	0001701 // in utero embryonic development // inferred from mutant phenotype /// 0001889 // liver development // inferred from mutant phenotype /// 0006350 // transcription // inferred from electronic annotation /// 0006355 // regulation of transcription, DNA-dependent // inferred from direct assay /// 0006355 // regulation of transcription, DNA-dependent // inferred from electronic annotation ///…	0005634 // nucleus // inferred from direct assay /// 0005634 // nucleus // inferred from electronic annotation /// 0005667 // transcription factor complex // inferred from direct assay	0003677 // DNA binding // inferred from direct assay /// 0003677 // DNA binding // inferred from electronic annotation /// 0003682 // chromatin binding // inferred from direct assay /// 0003700 // transcription factor activity // inferred from direct assay /// 0003700 // transcription factor activity // inferred from electronic annotation /// 0003705 // RNA polymerase II transcription factor acti…	GATA binding protein 6
1429504_at	1.32793	up	Rnpc3	67225		0005634 // nucleus // inferred from sequence or structural similarity /// 0005634 // nucleus // inferred from electronic annotation /// 0005689 // U12-dependent spliceosome // inferred from sequence or structural similarity	0000166 // nucleotide binding // inferred from electronic annotation /// 0003676 // nucleic acid binding // inferred from electronic annotation /// 0003723 // RNA binding // inferred from electronic annotation	RNA-binding region (RNP1, RRM) containing 3
1454018_at	1.327	up	Tlk2	24086	0001672 // regulation of chromatin assembly or disassembly // inferred from sequence or structural similarity /// 0006468 // protein amino acid phosphorylation // inferred from electronic annotation /// 0006468 // protein amino acid phosphorylation // inferred from sequence or structural similarity /// 0006974 // response to DNA damage stimulus // inferred from electronic annotation /// 0007049 /…	0005634 // nucleus // inferred from electronic annotation /// 0005634 // nucleus // inferred from sequence or structural similarity	0000166 // nucleotide binding // inferred from electronic annotation /// 0004672 // protein kinase activity // inferred from electronic annotation /// 0004674 // protein serine/threonine kinase activity // inferred from electronic annotation /// 0004674 // protein serine/threonine kinase activity // inferred from sequence or structural similarity /// 0005524 // ATP binding // inferred from electr…	tousled-like kinase 2 (Arabidopsis)
1454397_at	1.32692	up	4632418H02Rik	78265				RIKEN cDNA 4632418H02 gene
1420089_at	1.32689	up	Nfkbia	18035	0000060 // protein import into nucleus, translocation // inferred from direct assay /// 0031663 // lipopolysaccharide-mediated signaling pathway // inferred from direct assay /// 0032495 // response to muramyl dipeptide // inferred from direct assay /// 0032496 // response to lipopolysaccharide // inferred from direct assay /// 0034142 // toll-like receptor 4 signaling pathway // inferred from di…	0005634 // nucleus // inferred from direct assay /// 0005634 // nucleus // inferred from electronic annotation /// 0005737 // cytoplasm // inferred from direct assay /// 0005737 // cytoplasm // inferred from electronic annotation /// 0005829 // cytosol // inferred from direct assay	0005515 // protein binding // inferred from physical interaction /// 0008139 // nuclear localization sequence binding // inferred from electronic annotation /// 0031625 // ubiquitin protein ligase binding // inferred from electronic annotation /// 0042802 // identical protein binding // inferred from electronic annotation /// 0051059 // NF-kappaB binding // inferred from electronic annotation	Nuclear factor of kappa light polypeptide gene enhancer in B-cells inhibitor, alpha (Nfkbia), mRNA
1451392_at	1.32653	up	Elmod3 /// LOC100047355	100047355 /// 232089	0006909 // phagocytosis // inferred from electronic annotation	0005856 // cytoskeleton // inferred from electronic annotation		ELMO/CED-12 domain containing 3 /// similar to RNA binding motif and ELMO domain 1
1438428_at	1.32638	up	Jph1	57339	0007517 // muscle organ development // inferred from mutant phenotype	0005783 // endoplasmic reticulum // inferred from electronic annotation /// 0005789 // endoplasmic reticulum membrane // inferred from electronic annotation /// 0005792 // microsome // inferred from direct assay /// 0005886 // plasma membrane // inferred from electronic annotation /// 0016020 // membrane // inferred from electronic annotation /// 0016021 // integral to membrane // inferred from e…	0008307 // structural constituent of muscle // inferred from mutant phenotype	junctophilin 1
1456605_at	1.326	up	Cebpd	12609	0006350 // transcription // inferred from electronic annotation /// 0006355 // regulation of transcription, DNA-dependent // inferred from electronic annotation /// 0045944 // positive regulation of transcription from RNA polymerase II promoter // inferred from direct assay	0005634 // nucleus // inferred from direct assay /// 0005634 // nucleus // inferred from electronic annotation	0003677 // DNA binding // inferred from direct assay /// 0003677 // DNA binding // inferred from electronic annotation /// 0003700 // transcription factor activity // inferred from electronic annotation /// 0003704 // specific RNA polymerase II transcription factor activity // inferred from direct assay /// 0005515 // protein binding // inferred from physical interaction /// 0010843 // promoter b…	CCAAT/enhancer binding protein (C/EBP), delta (Cebpd), mRNA
1442726_s_at	1.32566	up	AI845619	103846				expressed sequence AI845619
1439460_a_at	1.32456	up	Arfgap2	77038	0006810 // transport // inferred from electronic annotation /// 0015031 // protein transport // inferred from electronic annotation /// 0016192 // vesicle-mediated transport // inferred from electronic annotation /// 0032312 // regulation of ARF GTPase activity // inferred from electronic annotation	0000139 // Golgi membrane // inferred from electronic annotation /// 0005737 // cytoplasm // inferred from electronic annotation /// 0005794 // Golgi apparatus // inferred from electronic annotation /// 0016020 // membrane // inferred from electronic annotation	0005096 // GTPase activator activity // inferred from electronic annotation /// 0008060 // ARF GTPase activator activity // inferred from electronic annotation /// 0008270 // zinc ion binding // inferred from electronic annotation /// 0046872 // metal ion binding // inferred from electronic annotation	ADP-ribosylation factor GTPase activating protein 2
1420870_at	1.32435	up	Mllt10	17354		0005634 // nucleus // inferred from electronic annotation /// 0005737 // cytoplasm // inferred from electronic annotation	0005515 // protein binding // inferred from electronic annotation /// 0008270 // zinc ion binding // inferred from electronic annotation /// 0046872 // metal ion binding // inferred from electronic annotation	myeloid/lymphoid or mixed-lineage leukemia (trithorax homolog, Drosophila); translocated to, 10
1459864_at	1.32432	up	Gpr146	80290	0007165 // signal transduction // inferred from electronic annotation /// 0007186 // G-protein coupled receptor protein signaling pathway // inferred from electronic annotation	0005886 // plasma membrane // inferred from electronic annotation /// 0016020 // membrane // inferred from electronic annotation /// 0016021 // integral to membrane // inferred from electronic annotation	0004871 // signal transducer activity // inferred from electronic annotation /// 0004872 // receptor activity // inferred from electronic annotation /// 0004930 // G-protein coupled receptor activity // inferred from electronic annotation	G protein-coupled receptor 146
1452828_at	1.32426	up	Fbxo21	231670	0019941 // modification-dependent protein catabolic process // inferred from electronic annotation			F-box protein 21
1456961_at	1.32397	up	Eny2	223527	0006350 // transcription // inferred from electronic annotation /// 0006355 // regulation of transcription, DNA-dependent // inferred from electronic annotation /// 0006810 // transport // inferred from electronic annotation /// 0016568 // chromatin modification // inferred from electronic annotation /// 0045893 // positive regulation of transcription, DNA-dependent // inferred from sequence or s…	0000124 // SAGA complex // inferred from sequence or structural similarity /// 0005634 // nucleus // inferred from electronic annotation	0003713 // transcription coactivator activity // inferred from sequence or structural similarity /// 0030374 // ligand-dependent nuclear receptor transcription coactivator activity // inferred from sequence or structural similarity	enhancer of yellow 2 homolog (Drosophila)
1435881_at	1.32313	up	Pcbp2	18521		0005634 // nucleus // inferred from electronic annotation /// 0030529 // ribonucleoprotein complex // inferred from electronic annotation	0003677 // DNA binding // inferred from electronic annotation /// 0003723 // RNA binding // inferred from electronic annotation	poly(rC) binding protein 2
1436627_at	1.32308	up	D17Ertd663e	52042				DNA segment, Chr 17, ERATO Doi 663, expressed
1444218_at	1.32258	up	D19Ertd737e	76539				DNA segment, Chr 19, ERATO Doi 737, expressed
1424481_s_at	1.32252	up	Armcx5	494468		0005634 // nucleus // inferred from electronic annotation /// 0005737 // cytoplasm // inferred from electronic annotation /// 0005886 // plasma membrane // inferred from electronic annotation	0004872 // receptor activity // inferred from electronic annotation /// 0005488 // binding // inferred from electronic annotation	armadillo repeat containing, X-linked 5
1448785_at	1.3224	up	Runx1t1	12395	0006350 // transcription // inferred from electronic annotation /// 0006355 // regulation of transcription, DNA-dependent // inferred from direct assay /// 0006355 // regulation of transcription, DNA-dependent // inferred from electronic annotation /// 0045444 // fat cell differentiation // inferred from direct assay /// 0051101 // regulation of DNA binding // inferred from direct assay	0005634 // nucleus // inferred from direct assay /// 0005634 // nucleus // inferred from electronic annotation	0003677 // DNA binding // inferred from direct assay /// 0003677 // DNA binding // inferred from electronic annotation /// 0003700 // transcription factor activity // inferred from electronic annotation /// 0005515 // protein binding // inferred from physical interaction /// 0005515 // protein binding // inferred from electronic annotation /// 0008270 // zinc ion binding // inferred from electron…	runt-related transcription factor 1; translocated to, 1 (cyclin D-related)
1430637_at	1.32237	up	2210016H18Rik	70125				RIKEN cDNA 2210016H18 gene
1442461_at	1.32231	up	Gfod1	328232	0008152 // metabolic process // inferred from electronic annotation /// 0055114 // oxidation reduction // inferred from electronic annotation	0005576 // extracellular region // inferred from electronic annotation	0003824 // catalytic activity // inferred from electronic annotation /// 0005488 // binding // inferred from electronic annotation /// 0009055 // electron carrier activity // inferred from electronic annotation /// 0016491 // oxidoreductase activity // inferred from electronic annotation	glucose-fructose oxidoreductase domain containing 1
1435943_at	1.322	up	Dpep1	13479	0006508 // proteolysis // inferred from electronic annotation	0005886 // plasma membrane // inferred from electronic annotation /// 0016020 // membrane // inferred from electronic annotation /// 0016324 // apical plasma membrane // inferred from electronic annotation /// 0031225 // anchored to membrane // inferred from electronic annotation /// 0042995 // cell projection // inferred from electronic annotation	0005515 // protein binding // inferred from electronic annotation /// 0008233 // peptidase activity // inferred from electronic annotation /// 0008235 // metalloexopeptidase activity // inferred from electronic annotation /// 0008237 // metallopeptidase activity // inferred from electronic annotation /// 0008239 // dipeptidyl-peptidase activity // inferred from electronic annotation /// 0008270 /…	dipeptidase 1 (renal)
1429515_at	1.32188	up	Ubr2	224826	0006511 // ubiquitin-dependent protein catabolic process // inferred from direct assay /// 0007141 // male meiosis I // inferred from mutant phenotype /// 0007283 // spermatogenesis // inferred from mutant phenotype /// 0019941 // modification-dependent protein catabolic process // inferred from electronic annotation /// 0030163 // protein catabolic process // inferred from electronic annotation	0000151 // ubiquitin ligase complex // inferred from genetic interaction /// 0005634 // nucleus // inferred from electronic annotation	0004842 // ubiquitin-protein ligase activity // inferred from direct assay /// 0004842 // ubiquitin-protein ligase activity // inferred from genetic interaction /// 0004842 // ubiquitin-protein ligase activity // inferred from electronic annotation /// 0005515 // protein binding // inferred from genetic interaction /// 0005515 // protein binding // inferred from physical interaction /// 0005515 /…	ubiquitin protein ligase E3 component n-recognin 2
1431302_a_at	1.32172	up	Nudt7	67528	0009132 // nucleoside diphosphate metabolic process // inferred from electronic annotation /// 0015938 // coenzyme A catabolic process // inferred from direct assay /// 0046356 // acetyl-CoA catabolic process // inferred from direct assay /// 0050873 // brown fat cell differentiation // inferred from direct assay	0005777 // peroxisome // inferred from direct assay /// 0005777 // peroxisome // inferred from electronic annotation	0000287 // magnesium ion binding // inferred from electronic annotation /// 0003986 // acetyl-CoA hydrolase activity // inferred from direct assay /// 0016787 // hydrolase activity // inferred from electronic annotation /// 0016818 // hydrolase activity, acting on acid anhydrides, in phosphorus-containing anhydrides // inferred from electronic annotation /// 0030145 // manganese ion binding // in…	nudix (nucleoside diphosphate linked moiety X)-type motif 7
1424104_at	1.32162	up	Syf2	68592	0006397 // mRNA processing // inferred from electronic annotation /// 0008380 // RNA splicing // inferred from electronic annotation	0005634 // nucleus // inferred from direct assay /// 0005634 // nucleus // inferred from electronic annotation /// 0005681 // spliceosome // inferred from electronic annotation	0005515 // protein binding // traceable author statement	SYF2 homolog, RNA splicing factor (S. cerevisiae)
1428809_at	1.32146	up	1810010H24Rik	69066			0005515 // protein binding // inferred from electronic annotation	RIKEN cDNA 1810010H24 gene
1456080_a_at	1.32092	up	Serinc3	26943	0006917 // induction of apoptosis // inferred from direct assay	0000139 // Golgi membrane // inferred from electronic annotation /// 0005794 // Golgi apparatus // inferred from direct assay /// 0005794 // Golgi apparatus // inferred from electronic annotation /// 0005886 // plasma membrane // inferred from direct assay /// 0005886 // plasma membrane // inferred from electronic annotation /// 0016020 // membrane // inferred from electronic annotation /// 00160…	0005515 // protein binding // inferred from electronic annotation	serine incorporator 3
1434302_at	1.32089	up	Raph1	77300				Ras association (RalGDS/AF-6) and pleckstrin homology domains 1
1429343_at	1.32085	up	LOC100046433 /// Rbmxl2	100046433 /// 76572			0000166 // nucleotide binding // inferred from electronic annotation /// 0003676 // nucleic acid binding // inferred from electronic annotation	similar to testes-specific heterogenous nuclear ribonucleoprotein G-T /// RNA binding motif protein, X-linked-like 2
1455047_at	1.32082	up	Fbxo3	57443	0019941 // modification-dependent protein catabolic process // inferred from electronic annotation			F-box protein 3
1453326_at	1.31978	up	Fam148a /// Fam148b	244911 /// 75697				family with sequence similarity 148, member A /// family with sequence similarity 148, member B
1451762_a_at	1.31974	up	Kif1b	16561	0007018 // microtubule-based movement // inferred from electronic annotation /// 0007018 // microtubule-based movement // inferred from direct assay /// 0007270 // nerve-nerve synaptic transmission // inferred from mutant phenotype /// 0007274 // neuromuscular synaptic transmission // inferred from mutant phenotype /// 0008089 // anterograde axon cargo transport // inferred from mutant phenotype …	0005737 // cytoplasm // inferred from electronic annotation /// 0005739 // mitochondrion // inferred from direct assay /// 0005739 // mitochondrion // inferred from electronic annotation /// 0005856 // cytoskeleton // inferred from electronic annotation /// 0005874 // microtubule // inferred from electronic annotation /// 0005875 // microtubule associated complex // inferred from direct assay ///…	0000166 // nucleotide binding // inferred from electronic annotation /// 0003774 // motor activity // inferred from electronic annotation /// 0003777 // microtubule motor activity // inferred from direct assay /// 0003777 // microtubule motor activity // inferred from electronic annotation /// 0005515 // protein binding // inferred from direct assay /// 0005524 // ATP binding // inferred from ele…	kinesin family member 1B
1454735_at	1.31894	up	LOC100047199 /// Odf2	100047199 /// 18286	0007275 // multicellular organismal development // inferred from electronic annotation /// 0007283 // spermatogenesis // inferred from electronic annotation /// 0030154 // cell differentiation // inferred from electronic annotation	0005813 // centrosome // inferred from electronic annotation /// 0005814 // centriole // inferred from direct assay /// 0005874 // microtubule // inferred from electronic annotation /// 0005929 // cilium // inferred from electronic annotation /// 0019861 // flagellum // inferred from direct assay /// 0042995 // cell projection // inferred from electronic annotation	0005200 // structural constituent of cytoskeleton // traceable author statement	similar to outer dense fiber of sperm tails 2 /// outer dense fiber of sperm tails 2
1420307_a_at	1.3185	up	Pitpnb	56305	0001701 // in utero embryonic development // inferred from mutant phenotype /// 0006810 // transport // inferred from electronic annotation	0005622 // intracellular // inferred from electronic annotation /// 0005737 // cytoplasm // inferred from electronic annotation /// 0005794 // Golgi apparatus // inferred from electronic annotation	0005543 // phospholipid binding // not recorded /// 0008289 // lipid binding // inferred from electronic annotation	phosphatidylinositol transfer protein, beta
1454802_x_at	1.31836	up	Arih2	23807	0006511 // ubiquitin-dependent protein catabolic process // inferred from physical interaction /// 0019941 // modification-dependent protein catabolic process // inferred from electronic annotation	0005634 // nucleus // inferred from electronic annotation	0003676 // nucleic acid binding // inferred from electronic annotation /// 0005515 // protein binding // inferred from electronic annotation /// 0008270 // zinc ion binding // inferred from electronic annotation /// 0046872 // metal ion binding // inferred from electronic annotation	ariadne homolog 2 (Drosophila)
1425981_a_at	1.31782	up	Rbl2	19651	0006350 // transcription // inferred from electronic annotation /// 0006355 // regulation of transcription, DNA-dependent // inferred from electronic annotation /// 0007049 // cell cycle // inferred from electronic annotation /// 0016568 // chromatin modification // inferred from electronic annotation /// 0045786 // negative regulation of cell cycle // inferred from electronic annotation	0005634 // nucleus // inferred from direct assay /// 0005634 // nucleus // inferred from electronic annotation /// 0005667 // transcription factor complex // inferred from direct assay	0003677 // DNA binding // inferred from electronic annotation /// 0005515 // protein binding // inferred from physical interaction /// 0005515 // protein binding // inferred from electronic annotation	retinoblastoma-like 2
1459947_at	1.31755	up
1459419_at	1.3168	up
1419439_at	1.31616	up	Tsks	22116			0016301 // kinase activity // inferred from electronic annotation	testis-specific serine kinase substrate
1455013_at	1.31615	up	Arih2	23807	0006511 // ubiquitin-dependent protein catabolic process // inferred from physical interaction /// 0019941 // modification-dependent protein catabolic process // inferred from electronic annotation	0005634 // nucleus // inferred from electronic annotation	0003676 // nucleic acid binding // inferred from electronic annotation /// 0005515 // protein binding // inferred from electronic annotation /// 0008270 // zinc ion binding // inferred from electronic annotation /// 0046872 // metal ion binding // inferred from electronic annotation	ariadne homolog 2 (Drosophila)
1456788_at	1.31561	up	Mrpl54	66047		0005739 // mitochondrion // inferred from electronic annotation /// 0005840 // ribosome // inferred from electronic annotation /// 0030529 // ribonucleoprotein complex // inferred from electronic annotation		mitochondrial ribosomal protein L54
1447061_at	1.31527	up	Hif3a	53417	0001666 // response to hypoxia // inferred from direct assay /// 0006350 // transcription // inferred from electronic annotation /// 0006355 // regulation of transcription, DNA-dependent // inferred from electronic annotation /// 0006366 // transcription from RNA polymerase II promoter // inferred from physical interaction /// 0007165 // signal transduction // inferred from electronic annotation …	0005634 // nucleus // inferred by curator /// 0005634 // nucleus // inferred from electronic annotation /// 0005737 // cytoplasm // inferred from electronic annotation	0003677 // DNA binding // inferred from physical interaction /// 0003677 // DNA binding // inferred from electronic annotation /// 0003700 // transcription factor activity // inferred from physical interaction /// 0004871 // signal transducer activity // inferred from electronic annotation /// 0030528 // transcription regulator activity // inferred from electronic annotation	hypoxia inducible factor 3, alpha subunit
1420150_at	1.31489	up	Spsb1	74646	0007242 // intracellular signaling cascade // inferred from electronic annotation /// 0019941 // modification-dependent protein catabolic process // inferred from electronic annotation	0005737 // cytoplasm // inferred from electronic annotation	0004872 // receptor activity // inferred from electronic annotation	splA/ryanodine receptor domain and SOCS box containing 1
1438427_at	1.3144	up	Fam120b	67544	0006350 // transcription // inferred from electronic annotation /// 0006355 // regulation of transcription, DNA-dependent // inferred from electronic annotation /// 0030154 // cell differentiation // inferred from electronic annotation	0005634 // nucleus // inferred from electronic annotation		family with sequence similarity 120, member B
1426040_a_at	1.3142	up	LOC100047199 /// Odf2	100047199 /// 18286	0007275 // multicellular organismal development // inferred from electronic annotation /// 0007283 // spermatogenesis // inferred from electronic annotation /// 0030154 // cell differentiation // inferred from electronic annotation	0005813 // centrosome // inferred from electronic annotation /// 0005814 // centriole // inferred from direct assay /// 0005874 // microtubule // inferred from electronic annotation /// 0005929 // cilium // inferred from electronic annotation /// 0019861 // flagellum // inferred from direct assay /// 0042995 // cell projection // inferred from electronic annotation	0005200 // structural constituent of cytoskeleton // traceable author statement	similar to outer dense fiber of sperm tails 2 /// outer dense fiber of sperm tails 2
1426237_at	1.31419	up	Sp2	78912	0006350 // transcription // inferred from electronic annotation /// 0006355 // regulation of transcription, DNA-dependent // inferred from electronic annotation	0005622 // intracellular // inferred from electronic annotation /// 0005634 // nucleus // inferred from electronic annotation	0003676 // nucleic acid binding // inferred from electronic annotation /// 0003677 // DNA binding // inferred from sequence or structural similarity /// 0003677 // DNA binding // inferred from electronic annotation /// 0008270 // zinc ion binding // inferred from electronic annotation /// 0046872 // metal ion binding // inferred from electronic annotation	Sp2 transcription factor
1448503_at	1.31418	up	Mcl1	17210	0006915 // apoptosis // inferred from electronic annotation /// 0007275 // multicellular organismal development // inferred from electronic annotation /// 0030154 // cell differentiation // inferred from electronic annotation /// 0034097 // response to cytokine stimulus // not recorded /// 0042981 // regulation of apoptosis // inferred from electronic annotation	0005634 // nucleus // inferred from electronic annotation /// 0005737 // cytoplasm // inferred from electronic annotation /// 0005739 // mitochondrion // not recorded /// 0005739 // mitochondrion // inferred from electronic annotation /// 0016020 // membrane // not recorded /// 0016020 // membrane // inferred from electronic annotation /// 0016021 // integral to membrane // inferred from electron…	0005515 // protein binding // inferred from physical interaction /// 0005515 // protein binding // inferred from electronic annotation /// 0046982 // protein heterodimerization activity // inferred from electronic annotation	myeloid cell leukemia sequence 1
1435198_at	1.31398	up	545228	545228				predicted gene, 545228
1433708_at	1.31331	up	Srp68	217337		0005634 // nucleus // inferred from electronic annotation /// 0005730 // nucleolus // not recorded /// 0005737 // cytoplasm // inferred from electronic annotation /// 0005786 // signal recognition particle, endoplasmic reticulum targeting // inferred from electronic annotation /// 0030529 // ribonucleoprotein complex // inferred from electronic annotation	0003723 // RNA binding // inferred from electronic annotation	signal recognition particle 68
1439630_x_at	1.31315	up	Sbsn	282619		0005576 // extracellular region // inferred from electronic annotation /// 0005737 // cytoplasm // inferred from direct assay		suprabasin
1453678_at	1.31241	up	Mbd1	17190	0006306 // DNA methylation // traceable author statement /// 0006350 // transcription // inferred from electronic annotation /// 0006355 // regulation of transcription, DNA-dependent // inferred from electronic annotation	0000785 // chromatin // inferred from direct assay /// 0000792 // heterochromatin // inferred from direct assay /// 0005634 // nucleus // inferred from direct assay /// 0005634 // nucleus // inferred from electronic annotation /// 0005730 // nucleolus // inferred from direct assay /// 0005737 // cytoplasm // inferred from direct assay /// 0016607 // nuclear speck // inferred from electronic annot…	0003677 // DNA binding // inferred from direct assay /// 0003677 // DNA binding // inferred from electronic annotation /// 0008270 // zinc ion binding // inferred from electronic annotation /// 0046872 // metal ion binding // inferred from electronic annotation	methyl-CpG binding domain protein 1
1416800_at	1.31226	up	Trpm7	58800	0006468 // protein amino acid phosphorylation // inferred from direct assay /// 0006468 // protein amino acid phosphorylation // inferred from electronic annotation /// 0006810 // transport // inferred from electronic annotation /// 0006811 // ion transport // inferred from electronic annotation /// 0006816 // calcium ion transport // inferred from direct assay /// 0006816 // calcium ion transpor…	0001726 // ruffle // inferred from direct assay /// 0005886 // plasma membrane // inferred from direct assay /// 0016020 // membrane // inferred from electronic annotation /// 0016021 // integral to membrane // inferred from electronic annotation	0000166 // nucleotide binding // inferred from electronic annotation /// 0003779 // actin binding // inferred from direct assay /// 0004674 // protein serine/threonine kinase activity // inferred from electronic annotation /// 0004872 // receptor activity // inferred from electronic annotation /// 0005216 // ion channel activity // inferred from electronic annotation /// 0005262 // calcium channe…	transient receptor potential cation channel, subfamily M, member 7
1455679_at	1.31223	up	Obfc2a	109019		0005634 // nucleus // inferred from direct assay /// 0005634 // nucleus // inferred from electronic annotation	0003676 // nucleic acid binding // inferred from electronic annotation /// 0003697 // single-stranded DNA binding // inferred from direct assay /// 0003723 // RNA binding // inferred from direct assay	oligonucleotide/oligosaccharide-binding fold containing 2A
1439101_at	1.3119	up	Mylk3	213435	0006468 // protein amino acid phosphorylation // inferred from electronic annotation /// 0016310 // phosphorylation // inferred from electronic annotation		0000166 // nucleotide binding // inferred from electronic annotation /// 0000287 // magnesium ion binding // inferred from electronic annotation /// 0004672 // protein kinase activity // inferred from electronic annotation /// 0004674 // protein serine/threonine kinase activity // inferred from electronic annotation /// 0004687 // myosin light chain kinase activity // inferred from electronic ann…	myosin light chain kinase 3
1425580_a_at	1.31186	up	Pik3c3	225326	0006468 // protein amino acid phosphorylation // inferred from mutant phenotype /// 0046854 // phosphoinositide phosphorylation // inferred from electronic annotation /// 0048015 // phosphoinositide-mediated signaling // inferred from electronic annotation	0005942 // phosphoinositide 3-kinase complex // inferred from electronic annotation	0000166 // nucleotide binding // inferred from electronic annotation /// 0004428 // inositol or phosphatidylinositol kinase activity // inferred from electronic annotation /// 0004672 // protein kinase activity // inferred from mutant phenotype /// 0005488 // binding // inferred from electronic annotation /// 0005515 // protein binding // not recorded /// 0005515 // protein binding // inferred fr…	phosphoinositide-3-kinase, class 3
1449964_a_at	1.3118	up	Mlycd	56690	0006085 // acetyl-CoA biosynthetic process // inferred from electronic annotation /// 0006633 // fatty acid biosynthetic process // inferred from electronic annotation /// 0008610 // lipid biosynthetic process // inferred from electronic annotation /// 0031998 // regulation of fatty acid beta-oxidation // inferred from electronic annotation	0005737 // cytoplasm // inferred from electronic annotation /// 0005739 // mitochondrion // inferred from direct assay /// 0005739 // mitochondrion // inferred from electronic annotation /// 0005777 // peroxisome // inferred from electronic annotation /// 0005829 // cytosol // inferred from electronic annotation	0016829 // lyase activity // inferred from electronic annotation /// 0016831 // carboxy-lyase activity // inferred from electronic annotation /// 0050080 // malonyl-CoA decarboxylase activity // inferred from electronic annotation	malonyl-CoA decarboxylase
1460360_at	1.31179	up	Asrgl1	66514	0033345 // asparagine catabolic process via L-aspartate // not recorded /// 0033345 // asparagine catabolic process via L-aspartate // inferred from sequence or structural similarity	0005737 // cytoplasm // not recorded /// 0005737 // cytoplasm // inferred from electronic annotation /// 0005737 // cytoplasm // inferred from sequence or structural similarity	0003948 // N4-(beta-N-acetylglucosaminyl)-L-asparaginase activity // inferred from sequence or structural similarity /// 0004067 // asparaginase activity // not recorded /// 0004067 // asparaginase activity // inferred from electronic annotation /// 0016787 // hydrolase activity // inferred from electronic annotation	asparaginase like 1
1417522_at	1.31177	up	Fbxo32	67731	0019941 // modification-dependent protein catabolic process // inferred from electronic annotation	0005634 // nucleus // inferred from sequence or structural similarity	0005515 // protein binding // inferred from direct assay	F-box protein 32
1439292_at	1.31167	up
1438963_s_at	1.31166	up	Tfpt	69714	0006917 // induction of apoptosis // not recorded	0005634 // nucleus // not recorded /// 0005634 // nucleus // inferred from electronic annotation	0005515 // protein binding // not recorded /// 0046982 // protein heterodimerization activity // not recorded	TCF3 (E2A) fusion partner
1459718_x_at	1.31148	up	Klf6	23849	0006350 // transcription // inferred from electronic annotation /// 0006355 // regulation of transcription, DNA-dependent // inferred from electronic annotation /// 0019221 // cytokine-mediated signaling pathway // inferred from direct assay	0005622 // intracellular // inferred from electronic annotation /// 0005634 // nucleus // inferred from direct assay /// 0005634 // nucleus // inferred from electronic annotation /// 0005737 // cytoplasm // inferred from direct assay	0003676 // nucleic acid binding // inferred from electronic annotation /// 0003677 // DNA binding // inferred from sequence or structural similarity /// 0003677 // DNA binding // inferred from electronic annotation /// 0008270 // zinc ion binding // inferred from electronic annotation /// 0046872 // metal ion binding // inferred from electronic annotation	Kruppel-like factor 6
1429351_at	1.31111	up	Klhl24	75785		0005737 // cytoplasm // inferred from electronic annotation /// 0042995 // cell projection // inferred from electronic annotation /// 0043204 // perikaryon // inferred from electronic annotation	0005515 // protein binding // inferred from electronic annotation	kelch-like 24 (Drosophila)
1416860_s_at	1.31076	up	Ing1	26356	0007049 // cell cycle // inferred from electronic annotation /// 0045786 // negative regulation of cell cycle // inferred from electronic annotation /// 0045941 // positive regulation of transcription // inferred from direct assay	0005634 // nucleus // inferred from electronic annotation	0005515 // protein binding // inferred from electronic annotation /// 0008270 // zinc ion binding // inferred from electronic annotation /// 0016563 // transcription activator activity // inferred from direct assay /// 0046872 // metal ion binding // inferred from electronic annotation	inhibitor of growth family, member 1
1423571_at	1.31065	up	S1pr1	13609	0001525 // angiogenesis // inferred from direct assay /// 0007165 // signal transduction // inferred from electronic annotation /// 0007186 // G-protein coupled receptor protein signaling pathway // inferred from electronic annotation /// 0007193 // inhibition of adenylate cyclase activity by G-protein signaling // inferred from direct assay /// 0007420 // brain development // inferred from mutan…	0005886 // plasma membrane // inferred from electronic annotation /// 0009897 // external side of plasma membrane // inferred from mutant phenotype /// 0016020 // membrane // inferred from electronic annotation /// 0016021 // integral to membrane // inferred from electronic annotation	0001619 // lysosphingolipid and lysophosphatidic acid receptor activity // inferred from electronic annotation /// 0004871 // signal transducer activity // inferred from electronic annotation /// 0004872 // receptor activity // inferred from electronic annotation /// 0004930 // G-protein coupled receptor activity // inferred from electronic annotation /// 0046625 // sphingolipid binding // inferr…	sphingosine-1-phosphate receptor 1
1433670_at	1.31052	up	Emp2	13731		0016020 // membrane // inferred from electronic annotation /// 0016021 // integral to membrane // inferred from electronic annotation		epithelial membrane protein 2
1457758_at	1.31049	up	Eny2	223527	0006350 // transcription // inferred from electronic annotation /// 0006355 // regulation of transcription, DNA-dependent // inferred from electronic annotation /// 0006810 // transport // inferred from electronic annotation /// 0016568 // chromatin modification // inferred from electronic annotation /// 0045893 // positive regulation of transcription, DNA-dependent // inferred from sequence or s…	0000124 // SAGA complex // inferred from sequence or structural similarity /// 0005634 // nucleus // inferred from electronic annotation	0003713 // transcription coactivator activity // inferred from sequence or structural similarity /// 0030374 // ligand-dependent nuclear receptor transcription coactivator activity // inferred from sequence or structural similarity	enhancer of yellow 2 homolog (Drosophila)
1447751_x_at	1.31021	up	Dus2l	66369	0008033 // tRNA processing // inferred from electronic annotation /// 0008152 // metabolic process // inferred from electronic annotation /// 0055114 // oxidation reduction // inferred from electronic annotation	0005622 // intracellular // inferred from electronic annotation /// 0005737 // cytoplasm // inferred from electronic annotation /// 0005783 // endoplasmic reticulum // inferred from electronic annotation	0003723 // RNA binding // inferred from electronic annotation /// 0003725 // double-stranded RNA binding // inferred from electronic annotation /// 0003824 // catalytic activity // inferred from electronic annotation /// 0016491 // oxidoreductase activity // inferred from electronic annotation /// 0017150 // tRNA dihydrouridine synthase activity // inferred from electronic annotation /// 0050660 …	dihydrouridine synthase 2-like (SMM1, S. cerevisiae)
1431166_at	1.3102	up	Chd1	12648	0006333 // chromatin assembly or disassembly // non-traceable author statement /// 0006333 // chromatin assembly or disassembly // inferred from electronic annotation /// 0006338 // chromatin remodeling // inferred from genetic interaction	0000785 // chromatin // inferred from electronic annotation /// 0005634 // nucleus // non-traceable author statement /// 0005634 // nucleus // inferred from electronic annotation	0000166 // nucleotide binding // inferred from electronic annotation /// 0003676 // nucleic acid binding // inferred from electronic annotation /// 0003677 // DNA binding // inferred from electronic annotation /// 0003682 // chromatin binding // non-traceable author statement /// 0003682 // chromatin binding // inferred from electronic annotation /// 0004386 // helicase activity // non-traceable …	chromodomain helicase DNA binding protein 1
1441150_x_at	1.31012	up	100039339 /// 100039507 /// 100040033 /// 100040034 /// 100041612 /// 100042124 /// 100042177 /// 100042523 /// LOC100045906 /// LOC100046656 /// OTTMUSG00000011313	100039339 /// 100039507 /// 100040033 /// 100040034 /// 100040733 /// 100041612 /// 100042124 /// 100042177 /// 100042523 /// 100045906 /// 100046656				predicted gene, 100039339 /// predicted gene, 100039507 /// predicted gene, 100040033 /// predicted gene, 100040034 /// predicted gene, 100041612 /// predicted gene, 100042124 /// predicted gene, 100042177 /// predicted gene, 100042523 /// similar to cyclic nucleotide gated channel beta 1 /// similar to pol protein /// predicted gene, OTTMUSG00000011313
1454072_at	1.31012	up	4731417B20Rik	74576				RIKEN cDNA 4731417B20 gene
1435553_at	1.30963	up	Pdzd2	68070		0030054 // cell junction // not recorded	0005515 // protein binding // not recorded /// 0005515 // protein binding // inferred from electronic annotation	PDZ domain containing 2
1457131_at	1.30962	up	Fry	320365				furry homolog (Drosophila)
1416721_s_at	1.30948	up	Sfrs6	67996			0000166 // nucleotide binding // inferred from electronic annotation /// 0003676 // nucleic acid binding // inferred from electronic annotation /// 0005515 // protein binding // inferred from electronic annotation	splicing factor, arginine/serine-rich 6
1446147_at	1.30944	up	Rbm39	170791	0006350 // transcription // traceable author statement /// 0006350 // transcription // inferred from electronic annotation /// 0006355 // regulation of transcription, DNA-dependent // inferred from electronic annotation /// 0006397 // mRNA processing // inferred from electronic annotation /// 0008380 // RNA splicing // inferred from electronic annotation	0005634 // nucleus // traceable author statement /// 0005634 // nucleus // inferred from electronic annotation /// 0005856 // cytoskeleton // inferred from electronic annotation	0000166 // nucleotide binding // inferred from electronic annotation /// 0003676 // nucleic acid binding // inferred from electronic annotation /// 0003713 // transcription coactivator activity // traceable author statement /// 0003723 // RNA binding // inferred from electronic annotation /// 0005515 // protein binding // inferred from physical interaction	RNA binding motif protein 39
1425057_at	1.309	up	Pbld	68371	0009058 // biosynthetic process // inferred from electronic annotation		0003824 // catalytic activity // inferred from electronic annotation /// 0016853 // isomerase activity // inferred from electronic annotation	phenazine biosynthesis-like protein domain containing
1442494_at	1.30873	up	C79242	98068				expressed sequence C79242
1431696_at	1.30839	up	Os9	216440			0005515 // protein binding // inferred from electronic annotation	amplified in osteosarcoma
1429216_at	1.3081	up	Paqr3	231474		0000139 // Golgi membrane // inferred from electronic annotation /// 0005794 // Golgi apparatus // inferred from electronic annotation /// 0016020 // membrane // inferred from electronic annotation /// 0016021 // integral to membrane // inferred from electronic annotation	0004872 // receptor activity // inferred from electronic annotation	progestin and adipoQ receptor family member III
1451195_a_at	1.30772	up	Tmx1	72736	0006810 // transport // inferred from electronic annotation /// 0006916 // anti-apoptosis // inferred from electronic annotation /// 0022900 // electron transport chain // inferred from electronic annotation /// 0045454 // cell redox homeostasis // inferred from electronic annotation	0005624 // membrane fraction // inferred from electronic annotation /// 0005634 // nucleus // inferred from electronic annotation /// 0005783 // endoplasmic reticulum // inferred from electronic annotation /// 0005789 // endoplasmic reticulum membrane // inferred from electronic annotation /// 0016020 // membrane // inferred from electronic annotation /// 0016021 // integral to membrane // inferr…	0015036 // disulfide oxidoreductase activity // inferred from electronic annotation	thioredoxin-related transmembrane protein 1
1419440_at	1.30767	up	Trim54	58522	0007026 // negative regulation of microtubule depolymerization // inferred from direct assay /// 0007275 // multicellular organismal development // inferred from electronic annotation /// 0030154 // cell differentiation // inferred from electronic annotation	0005622 // intracellular // inferred from electronic annotation /// 0005737 // cytoplasm // inferred from electronic annotation /// 0005856 // cytoskeleton // inferred from electronic annotation /// 0005874 // microtubule // inferred from electronic annotation /// 0005875 // microtubule associated complex // inferred from direct assay	0005515 // protein binding // inferred from electronic annotation /// 0008017 // microtubule binding // inferred from direct assay /// 0008270 // zinc ion binding // inferred from electronic annotation /// 0046872 // metal ion binding // inferred from electronic annotation	tripartite motif-containing 54
1424745_at	1.30741	up	Agxt2l2	72947		0005739 // mitochondrion // inferred from electronic annotation	0003824 // catalytic activity // inferred from electronic annotation /// 0008483 // transaminase activity // inferred from electronic annotation /// 0016740 // transferase activity // inferred from electronic annotation /// 0030170 // pyridoxal phosphate binding // inferred from electronic annotation	alanine-glyoxylate aminotransferase 2-like 2
1416613_at	1.30686	up	Cyp1b1	13078	0006725 // cellular aromatic compound metabolic process // inferred from electronic annotation /// 0008210 // estrogen metabolic process // inferred from electronic annotation /// 0009404 // toxin metabolic process // inferred from mutant phenotype /// 0010033 // response to organic substance // inferred from electronic annotation /// 0018894 // dibenzo-p-dioxin metabolic process // inferred from…	0005783 // endoplasmic reticulum // inferred from electronic annotation /// 0005789 // endoplasmic reticulum membrane // inferred from electronic annotation /// 0005792 // microsome // inferred from direct assay /// 0005792 // microsome // inferred from electronic annotation /// 0016020 // membrane // inferred from electronic annotation	0004497 // monooxygenase activity // inferred from electronic annotation /// 0005506 // iron ion binding // inferred from electronic annotation /// 0005515 // protein binding // inferred from electronic annotation /// 0009055 // electron carrier activity // inferred from electronic annotation /// 0016491 // oxidoreductase activity // inferred from electronic annotation /// 0020037 // heme binding…	cytochrome P450, family 1, subfamily b, polypeptide 1
1431892_a_at	1.30683	up	Plcd3	72469	0001525 // angiogenesis // inferred from genetic interaction /// 0001890 // placenta development // inferred from genetic interaction /// 0006629 // lipid metabolic process // inferred from electronic annotation /// 0007165 // signal transduction // inferred from electronic annotation /// 0007242 // intracellular signaling cascade // inferred from electronic annotation /// 0016042 // lipid catabo…	0005737 // cytoplasm // inferred from electronic annotation /// 0016020 // membrane // inferred from electronic annotation	0004435 // phosphoinositide phospholipase C activity // inferred from electronic annotation /// 0004629 // phospholipase C activity // inferred from electronic annotation /// 0004871 // signal transducer activity // inferred from electronic annotation /// 0005509 // calcium ion binding // inferred from electronic annotation /// 0008081 // phosphoric diester hydrolase activity // inferred from ele…	phospholipase C, delta 3
1441958_s_at	1.30667	up	Ager	11596	0007259 // JAK-STAT cascade // inferred from electronic annotation /// 0007399 // nervous system development // inferred from electronic annotation /// 0007420 // brain development // inferred from electronic annotation /// 0007568 // aging // inferred from electronic annotation /// 0048661 // positive regulation of smooth muscle cell proliferation // inferred from electronic annotation /// 00509…	0005615 // extracellular space // inferred from electronic annotation /// 0009925 // basal plasma membrane // inferred from electronic annotation /// 0016020 // membrane // inferred from electronic annotation /// 0016021 // integral to membrane // inferred from electronic annotation	0004872 // receptor activity // inferred from electronic annotation /// 0050785 // advanced glycation end-product receptor activity // inferred from electronic annotation	advanced glycosylation end product-specific receptor
1458931_at	1.30654	up	6030427F01Rik	97411				RIKEN cDNA 6030427F01 gene
1444021_at	1.3062	up	Sqstm1	18412	0006915 // apoptosis // inferred from electronic annotation /// 0006955 // immune response // inferred from electronic annotation /// 0030154 // cell differentiation // inferred from electronic annotation /// 0043122 // regulation of I-kappaB kinase/NF-kappaB cascade // inferred from sequence or structural similarity	0005634 // nucleus // inferred from electronic annotation /// 0005737 // cytoplasm // inferred from electronic annotation /// 0005768 // endosome // inferred from electronic annotation /// 0005770 // late endosome // inferred from electronic annotation	0003712 // transcription cofactor activity // traceable author statement /// 0005515 // protein binding // inferred from physical interaction /// 0005515 // protein binding // inferred from sequence or structural similarity /// 0008270 // zinc ion binding // inferred from electronic annotation /// 0019901 // protein kinase binding // inferred from sequence or structural similarity /// 0042169 // …	sequestosome 1
1455596_a_at	1.30592	up	BC029214	227622				cDNA sequence BC029214
1425362_at	1.30527	up	Agfg2	231801	0032312 // regulation of ARF GTPase activity // inferred from electronic annotation		0008060 // ARF GTPase activator activity // inferred from electronic annotation /// 0008270 // zinc ion binding // inferred from electronic annotation /// 0046872 // metal ion binding // inferred from electronic annotation	ArfGAP with FG repeats 2
1420842_at	1.30487	up	Ptprf	19268	0006470 // protein amino acid dephosphorylation // inferred from electronic annotation /// 0007155 // cell adhesion // inferred from electronic annotation /// 0007156 // homophilic cell adhesion // inferred from electronic annotation /// 0007399 // nervous system development // inferred from electronic annotation /// 0016311 // dephosphorylation // inferred from electronic annotation	0016020 // membrane // inferred from electronic annotation /// 0016021 // integral to membrane // inferred from electronic annotation	0004721 // phosphoprotein phosphatase activity // inferred from electronic annotation /// 0004725 // protein tyrosine phosphatase activity // inferred from electronic annotation /// 0004872 // receptor activity // inferred from electronic annotation /// 0005515 // protein binding // inferred from electronic annotation /// 0016787 // hydrolase activity // inferred from electronic annotation /// 00…	protein tyrosine phosphatase, receptor type, F
1457017_at	1.30461	up	Fam82b	66302		0005737 // cytoplasm // inferred from electronic annotation /// 0005874 // microtubule // inferred from electronic annotation	0005488 // binding // inferred from electronic annotation	family with sequence similarity 82, member B
1417176_at	1.30455	up	Csnk1e	27373	0006468 // protein amino acid phosphorylation // inferred from electronic annotation /// 0007623 // circadian rhythm // traceable author statement /// 0016055 // Wnt receptor signaling pathway // inferred from electronic annotation	0005634 // nucleus // inferred from electronic annotation /// 0005737 // cytoplasm // inferred from electronic annotation	0000166 // nucleotide binding // inferred from electronic annotation /// 0004672 // protein kinase activity // inferred from electronic annotation /// 0004674 // protein serine/threonine kinase activity // inferred from electronic annotation /// 0005515 // protein binding // inferred from electronic annotation /// 0005524 // ATP binding // inferred from electronic annotation /// 0016301 // kinase…	casein kinase 1, epsilon
1416371_at	1.3042	up	Apod	11815	0006810 // transport // inferred from electronic annotation	0005576 // extracellular region // inferred from electronic annotation /// 0005622 // intracellular // inferred from direct assay	0005215 // transporter activity // inferred from electronic annotation /// 0005488 // binding // inferred from electronic annotation /// 0005501 // retinoid binding // inferred from electronic annotation /// 0005515 // protein binding // inferred from electronic annotation /// 0008289 // lipid binding // inferred from electronic annotation	apolipoprotein D
1440623_at	1.304	up	Gpr26	233919	0007165 // signal transduction // inferred from electronic annotation /// 0007186 // G-protein coupled receptor protein signaling pathway // inferred from electronic annotation	0005886 // plasma membrane // inferred from electronic annotation /// 0016020 // membrane // inferred from electronic annotation /// 0016021 // integral to membrane // inferred from electronic annotation	0004871 // signal transducer activity // inferred from electronic annotation /// 0004872 // receptor activity // inferred from electronic annotation /// 0004930 // G-protein coupled receptor activity // inferred from electronic annotation	G protein-coupled receptor 26
1428591_at	1.30311	up	Pnpla2	66853	0006629 // lipid metabolic process // inferred from electronic annotation /// 0008152 // metabolic process // inferred from electronic annotation /// 0016042 // lipid catabolic process // inferred from electronic annotation /// 0019433 // triglyceride catabolic process // inferred from mutant phenotype	0005811 // lipid particle // inferred from electronic annotation /// 0005829 // cytosol // inferred from direct assay /// 0005886 // plasma membrane // inferred from electronic annotation /// 0016020 // membrane // inferred from electronic annotation /// 0016021 // integral to membrane // inferred from electronic annotation /// 0034430 // monolayer-surrounded lipid storage body outer lipid monola…	0004806 // triacylglycerol lipase activity // inferred from mutant phenotype /// 0004806 // triacylglycerol lipase activity // inferred from electronic annotation /// 0016787 // hydrolase activity // inferred from electronic annotation	patatin-like phospholipase domain containing 2
1447774_x_at	1.30294	up	5730469M10Rik	70564		0005576 // extracellular region // inferred from electronic annotation /// 0005730 // nucleolus // inferred from electronic annotation /// 0005737 // cytoplasm // inferred from electronic annotation		RIKEN cDNA 5730469M10 gene
1446504_at	1.30267	up
1419281_a_at	1.3023	up	Zfp259	22687		0005634 // nucleus // inferred from direct assay /// 0005634 // nucleus // inferred from electronic annotation /// 0005737 // cytoplasm // inferred from direct assay /// 0005737 // cytoplasm // inferred from electronic annotation	0005515 // protein binding // inferred from physical interaction /// 0005515 // protein binding // inferred from electronic annotation /// 0008270 // zinc ion binding // inferred from direct assay /// 0008270 // zinc ion binding // inferred from electronic annotation /// 0046872 // metal ion binding // inferred from electronic annotation	zinc finger protein 259
1437866_at	1.30225	up	Dusp18	75219	0006470 // protein amino acid dephosphorylation // inferred from electronic annotation /// 0006612 // protein targeting to membrane // inferred from sequence or structural similarity /// 0006626 // protein targeting to mitochondrion // inferred from sequence or structural similarity /// 0016311 // dephosphorylation // inferred from electronic annotation /// 0033365 // protein localization in orga…	0005634 // nucleus // inferred from electronic annotation /// 0005737 // cytoplasm // inferred from sequence or structural similarity /// 0005737 // cytoplasm // inferred from electronic annotation /// 0005739 // mitochondrion // inferred from sequence or structural similarity /// 0005743 // mitochondrial inner membrane // inferred from sequence or structural similarity /// 0005758 // mitochondri…	0004721 // phosphoprotein phosphatase activity // inferred from electronic annotation /// 0004725 // protein tyrosine phosphatase activity // inferred from electronic annotation /// 0008138 // protein tyrosine/serine/threonine phosphatase activity // inferred from electronic annotation /// 0016787 // hydrolase activity // inferred from electronic annotation /// 0016791 // phosphatase activity // …	dual specificity phosphatase 18
1444433_at	1.30205	up
1435771_at	1.30201	up	Plcb4	18798	0006629 // lipid metabolic process // inferred from electronic annotation /// 0007165 // signal transduction // inferred from electronic annotation /// 0007242 // intracellular signaling cascade // inferred from electronic annotation	0005634 // nucleus // inferred from direct assay /// 0005790 // smooth endoplasmic reticulum // inferred from direct assay /// 0005792 // microsome // inferred from direct assay /// 0014069 // postsynaptic density // inferred from direct assay /// 0030425 // dendrite // inferred from direct assay	0004435 // phosphoinositide phospholipase C activity // inferred from electronic annotation /// 0004629 // phospholipase C activity // inferred from electronic annotation /// 0004871 // signal transducer activity // inferred from electronic annotation /// 0005509 // calcium ion binding // inferred from electronic annotation /// 0005515 // protein binding // inferred from physical interaction /// …	phospholipase C, beta 4
1437236_a_at	1.30151	up	Zfp110	65020	0006350 // transcription // inferred from electronic annotation /// 0006355 // regulation of transcription, DNA-dependent // inferred from electronic annotation	0005622 // intracellular // inferred from electronic annotation /// 0005634 // nucleus // inferred from electronic annotation	0003676 // nucleic acid binding // inferred from electronic annotation /// 0003700 // transcription factor activity // inferred from electronic annotation /// 0004872 // receptor activity // inferred from electronic annotation /// 0005515 // protein binding // inferred from physical interaction /// 0008270 // zinc ion binding // inferred from electronic annotation /// 0046872 // metal ion binding…	zinc finger protein 110
1422906_at	1.3015	up	Abcg2	26357	0006810 // transport // inferred from electronic annotation	0005886 // plasma membrane // inferred from electronic annotation /// 0016020 // membrane // inferred from electronic annotation /// 0016021 // integral to membrane // inferred from electronic annotation	0000166 // nucleotide binding // inferred from electronic annotation /// 0005524 // ATP binding // inferred from electronic annotation /// 0016887 // ATPase activity // inferred from electronic annotation /// 0017111 // nucleoside-triphosphatase activity // inferred from electronic annotation	ATP-binding cassette, sub-family G (WHITE), member 2
1421942_s_at	1.30134	up	Tgfa	21802	0000187 // activation of MAPK activity // inferred from electronic annotation /// 0000187 // activation of MAPK activity // inferred from sequence or structural similarity /// 0001525 // angiogenesis // inferred from direct assay /// 0008283 // cell proliferation // inferred from electronic annotation /// 0045741 // positive regulation of epidermal growth factor receptor activity // inferred from…	0005576 // extracellular region // inferred from electronic annotation /// 0005886 // plasma membrane // inferred from electronic annotation /// 0016020 // membrane // inferred from electronic annotation /// 0016021 // integral to membrane // inferred from electronic annotation	0001948 // glycoprotein binding // inferred from direct assay /// 0004708 // MAP kinase kinase activity // inferred from electronic annotation /// 0004708 // MAP kinase kinase activity // inferred from sequence or structural similarity /// 0008083 // growth factor activity // inferred from electronic annotation /// 0008083 // growth factor activity // inferred from sequence or structural similari…	transforming growth factor alpha
1427131_s_at	1.30108	up	Lrrc58	320184			0005515 // protein binding // inferred from electronic annotation	leucine rich repeat containing 58
1456006_at	1.30046	up	Bcl2l11	12125	0001701 // in utero embryonic development // inferred from genetic interaction /// 0001776 // leukocyte homeostasis // inferred from genetic interaction /// 0001776 // leukocyte homeostasis // inferred from mutant phenotype /// 0001782 // B cell homeostasis // inferred from genetic interaction /// 0001782 // B cell homeostasis // inferred from mutant phenotype /// 0001783 // B cell apoptosis // i…	0000300 // peripheral to membrane of membrane fraction // inferred from direct assay /// 0005737 // cytoplasm // inferred from direct assay /// 0005739 // mitochondrion // inferred from direct assay /// 0005739 // mitochondrion // inferred from electronic annotation /// 0016020 // membrane // inferred from electronic annotation /// 0043231 // intracellular membrane-bounded organelle // inferred f…	0005515 // protein binding // inferred from physical interaction /// 0005515 // protein binding // inferred from electronic annotation /// 0008017 // microtubule binding // inferred from direct assay	BCL2-like 11 (apoptosis facilitator)
1443897_at	1.30021	up	Ddit3	13198	0001975 // response to amphetamine // inferred from electronic annotation /// 0006350 // transcription // inferred from electronic annotation /// 0006355 // regulation of transcription, DNA-dependent // inferred from mutant phenotype /// 0006355 // regulation of transcription, DNA-dependent // inferred from electronic annotation /// 0006979 // response to oxidative stress // inferred from electro…	0005634 // nucleus // inferred by curator /// 0005634 // nucleus // inferred from direct assay /// 0005634 // nucleus // inferred from electronic annotation /// 0005737 // cytoplasm // inferred from electronic annotation	0003677 // DNA binding // inferred from direct assay /// 0003677 // DNA binding // not recorded /// 0003677 // DNA binding // inferred from electronic annotation /// 0003700 // transcription factor activity // inferred from mutant phenotype /// 0003700 // transcription factor activity // inferred from electronic annotation /// 0005515 // protein binding // inferred from physical interaction /// 0…	DNA-damage inducible transcript 3
1423747_a_at	1.30015	up	Pdk1	228026	0005975 // carbohydrate metabolic process // inferred from electronic annotation /// 0006006 // glucose metabolic process // inferred from electronic annotation /// 0007165 // signal transduction // inferred from electronic annotation /// 0007242 // intracellular signaling cascade // not recorded /// 0018106 // peptidyl-histidine phosphorylation // inferred from electronic annotation	0005739 // mitochondrion // inferred from direct assay /// 0005739 // mitochondrion // inferred from electronic annotation /// 0005759 // mitochondrial matrix // inferred from electronic annotation /// 0005886 // plasma membrane // not recorded	0000155 // two-component sensor activity // inferred from electronic annotation /// 0000166 // nucleotide binding // inferred from electronic annotation /// 0004673 // protein histidine kinase activity // inferred from electronic annotation /// 0004740 // pyruvate dehydrogenase (acetyl-transferring) kinase activity // inferred from electronic annotation /// 0005515 // protein binding // not recor…	pyruvate dehydrogenase kinase, isoenzyme 1
1438307_at	1.29997	up
1421836_at	1.29878	up	Mtap7	17761	0000902 // cell morphogenesis // inferred from mutant phenotype /// 0001578 // microtubule bundle formation // inferred from mutant phenotype /// 0006970 // response to osmotic stress // inferred from physical interaction /// 0006997 // nucleus organization // inferred from mutant phenotype /// 0007281 // germ cell development // inferred from mutant phenotype /// 0007283 // spermatogenesis // in…	0005737 // cytoplasm // inferred from electronic annotation /// 0005874 // microtubule // inferred from electronic annotation /// 0005886 // plasma membrane // inferred from direct assay /// 0005886 // plasma membrane // inferred from electronic annotation /// 0016020 // membrane // inferred from electronic annotation /// 0016323 // basolateral plasma membrane // inferred from electronic annotati…	0005515 // protein binding // inferred from physical interaction	microtubule-associated protein 7
1435704_at	1.29864	up	C920006O11Rik	320295				RIKEN cDNA C920006O11 gene
1456363_at	1.2983	up	St7l	229681		0016020 // membrane // inferred from electronic annotation /// 0016021 // integral to membrane // inferred from electronic annotation		Suppression of tumorigenicity 7-like (St7l), mRNA
1446018_at	1.29792	up	C79240	97531				expressed sequence C79240
1455165_at	1.29747	up
1419283_s_at	1.29731	up	Tns1	21961	0007044 // cell-substrate junction assembly // inferred from mutant phenotype /// 0016477 // cell migration // inferred from mutant phenotype	0005925 // focal adhesion // inferred from direct assay /// 0030055 // cell-substrate junction // inferred from direct assay	0003779 // actin binding // traceable author statement /// 0005515 // protein binding // inferred from electronic annotation	tensin 1
1455467_at	1.29712	up	C330043M08Rik	330323				RIKEN cDNA C330043M08 gene
1423659_a_at	1.297	up	Tbc1d17	233204	0032313 // regulation of Rab GTPase activity // inferred from electronic annotation	0005622 // intracellular // inferred from electronic annotation	0005096 // GTPase activator activity // inferred from electronic annotation /// 0005097 // Rab GTPase activator activity // inferred from electronic annotation	TBC1 domain family, member 17
1452929_at	1.2968	up	Clip1	56430		0005737 // cytoplasm // inferred from electronic annotation /// 0005856 // cytoskeleton // inferred from electronic annotation /// 0005874 // microtubule // inferred from electronic annotation /// 0005881 // cytoplasmic microtubule // inferred from direct assay /// 0005882 // intermediate filament // not recorded	0003676 // nucleic acid binding // inferred from electronic annotation /// 0005515 // protein binding // inferred from physical interaction /// 0008017 // microtubule binding // inferred from direct assay /// 0008270 // zinc ion binding // inferred from electronic annotation /// 0051010 // microtubule plus-end binding // inferred from direct assay	CAP-GLY domain containing linker protein 1
1440997_at	1.29668	up	Tnrc6c	217351	0006417 // regulation of translation // inferred from electronic annotation /// 0031047 // gene silencing by RNA // inferred from electronic annotation		0000166 // nucleotide binding // inferred from electronic annotation /// 0003676 // nucleic acid binding // inferred from electronic annotation /// 0003723 // RNA binding // inferred from electronic annotation	trinucleotide repeat containing 6C
1447023_at	1.29573	up
1454405_at	1.29566	up	4930453J04Rik	74652				RIKEN cDNA 4930453J04 gene
1456551_at	1.29532	up
1460725_at	1.29527	up	Xpa	22590	0006281 // DNA repair // inferred from mutant phenotype /// 0006281 // DNA repair // inferred from electronic annotation /// 0006289 // nucleotide-excision repair // inferred from mutant phenotype /// 0006289 // nucleotide-excision repair // inferred from electronic annotation /// 0006974 // response to DNA damage stimulus // inferred from electronic annotation /// 0006979 // response to oxidativ…	0005634 // nucleus // inferred from direct assay /// 0005634 // nucleus // inferred from electronic annotation	0000166 // nucleotide binding // inferred from electronic annotation /// 0003677 // DNA binding // inferred from electronic annotation /// 0003684 // damaged DNA binding // inferred from electronic annotation /// 0008270 // zinc ion binding // inferred from electronic annotation /// 0046872 // metal ion binding // inferred from electronic annotation	xeroderma pigmentosum, complementation group A
1428713_s_at	1.29477	up	Gins2	272551	0006260 // DNA replication // inferred from electronic annotation	0005634 // nucleus // inferred from electronic annotation	0005515 // protein binding // inferred from electronic annotation	GINS complex subunit 2 (Psf2 homolog)
1446033_at	1.29458	up	C87882	97571				expressed sequence C87882
1427759_a_at	1.29441	up	Art5	11875	0006471 // protein amino acid ADP-ribosylation // inferred from direct assay /// 0006471 // protein amino acid ADP-ribosylation // inferred from electronic annotation	0005576 // extracellular region // inferred from direct assay /// 0005576 // extracellular region // inferred from electronic annotation /// 0005624 // membrane fraction // inferred from direct assay /// 0016020 // membrane // inferred from electronic annotation	0003950 // NAD+ ADP-ribosyltransferase activity // inferred from direct assay /// 0003953 // NAD+ nucleosidase activity // inferred from direct assay /// 0003956 // NAD(P)+-protein-arginine ADP-ribosyltransferase activity // inferred from electronic annotation /// 0016740 // transferase activity // inferred from electronic annotation /// 0016757 // transferase activity, transferring glycosyl grou…	ADP-ribosyltransferase 5
1443166_at	1.29432	up
1428845_at	1.29426	up	Bclaf1	72567	0006350 // transcription // inferred from electronic annotation /// 0006355 // regulation of transcription, DNA-dependent // inferred from electronic annotation /// 0016481 // negative regulation of transcription // not recorded /// 0043065 // positive regulation of apoptosis // not recorded	0005634 // nucleus // not recorded /// 0005634 // nucleus // inferred from electronic annotation /// 0005737 // cytoplasm // inferred from electronic annotation	0003677 // DNA binding // not recorded /// 0003677 // DNA binding // inferred from electronic annotation /// 0005515 // protein binding // inferred from physical interaction /// 0016564 // transcription repressor activity // not recorded	BCL2-associated transcription factor 1
1435515_at	1.2941	up
1428267_at	1.29408	up	Dhx40	67487			0000166 // nucleotide binding // inferred from electronic annotation /// 0003676 // nucleic acid binding // inferred from electronic annotation /// 0004386 // helicase activity // inferred from electronic annotation /// 0005524 // ATP binding // inferred from electronic annotation /// 0008026 // ATP-dependent helicase activity // inferred from electronic annotation /// 0016787 // hydrolase activi…	DEAH (Asp-Glu-Ala-His) box polypeptide 40
1452984_at	1.29362	up	LOC100044842	100044842				similar to cyclin fold protein 1
1418740_at	1.29352	up	Spert	67926		0016023 // cytoplasmic membrane-bounded vesicle // inferred from direct assay		spermatid associated
1423761_at	1.2931	up	Mettl13	71449	0008152 // metabolic process // inferred from electronic annotation		0008168 // methyltransferase activity // inferred from electronic annotation /// 0016740 // transferase activity // inferred from electronic annotation	methyltransferase like 13
1417580_s_at	1.29298	up	Selenbp1	20341	0006810 // transport // inferred from electronic annotation /// 0015031 // protein transport // inferred from electronic annotation /// 0050873 // brown fat cell differentiation // inferred from direct assay	0005634 // nucleus // inferred from electronic annotation /// 0005737 // cytoplasm // inferred from electronic annotation /// 0016020 // membrane // inferred from electronic annotation	0008430 // selenium binding // traceable author statement /// 0008430 // selenium binding // inferred from electronic annotation	selenium binding protein 1
1415951_at	1.29298	up	Fkbp10	14230	0006457 // protein folding // inferred from electronic annotation	0005783 // endoplasmic reticulum // inferred from electronic annotation /// 0005788 // endoplasmic reticulum lumen // inferred from electronic annotation	0003755 // peptidyl-prolyl cis-trans isomerase activity // inferred from electronic annotation /// 0005509 // calcium ion binding // inferred from electronic annotation /// 0005515 // protein binding // inferred from physical interaction /// 0016853 // isomerase activity // inferred from electronic annotation	FK506 binding protein 10
1419070_at	1.29271	up	Cys1	12879		0005929 // cilium // inferred from electronic annotation /// 0005932 // microtubule basal body // inferred from direct assay /// 0035085 // cilium axoneme // inferred from direct assay /// 0042995 // cell projection // inferred from electronic annotation		cystin 1
1431429_a_at	1.29227	up	Arl4a	11861	0007264 // small GTPase mediated signal transduction // inferred from electronic annotation /// 0050873 // brown fat cell differentiation // inferred from direct assay	0005622 // intracellular // inferred from electronic annotation /// 0005634 // nucleus // inferred from electronic annotation	0000166 // nucleotide binding // inferred from electronic annotation /// 0003924 // GTPase activity // traceable author statement /// 0005525 // GTP binding // inferred from electronic annotation	ADP-ribosylation factor-like 4A
1427736_a_at	1.292	up	Ccrl2	54199	0007165 // signal transduction // inferred from electronic annotation /// 0007186 // G-protein coupled receptor protein signaling pathway // inferred from electronic annotation	0005886 // plasma membrane // inferred from electronic annotation /// 0016020 // membrane // inferred from electronic annotation /// 0016021 // integral to membrane // inferred from electronic annotation	0004871 // signal transducer activity // inferred from electronic annotation /// 0004872 // receptor activity // inferred from electronic annotation /// 0004930 // G-protein coupled receptor activity // inferred from electronic annotation /// 0016493 // C-C chemokine receptor activity // inferred from sequence or structural similarity /// 0016493 // C-C chemokine receptor activity // inferred fro…	chemokine (C-C motif) receptor-like 2
1454141_at	1.29185	up	5730416O20Rik	70557				RIKEN cDNA 5730416O20 gene
1435579_at	1.29172	up
1451361_a_at	1.29155	up	Pnpla7	241274	0006629 // lipid metabolic process // inferred from electronic annotation /// 0008152 // metabolic process // inferred from electronic annotation /// 0016042 // lipid catabolic process // inferred from electronic annotation /// 0046470 // phosphatidylcholine metabolic process // inferred from electronic annotation	0005634 // nucleus // inferred from electronic annotation /// 0005739 // mitochondrion // inferred from electronic annotation /// 0005764 // lysosome // inferred from electronic annotation /// 0005765 // lysosomal membrane // inferred from electronic annotation /// 0005783 // endoplasmic reticulum // inferred from electronic annotation /// 0005789 // endoplasmic reticulum membrane // inferred fro…	0004622 // lysophospholipase activity // inferred from electronic annotation /// 0016787 // hydrolase activity // inferred from electronic annotation	patatin-like phospholipase domain containing 7
1436316_at	1.2915	up	9430029L20Rik	109249				RIKEN cDNA 9430029L20 gene
1422768_at	1.29147	up	Syncrip	56403	0006397 // mRNA processing // inferred from electronic annotation /// 0008380 // RNA splicing // inferred from electronic annotation	0005634 // nucleus // inferred from electronic annotation /// 0005681 // spliceosome // inferred from electronic annotation /// 0005737 // cytoplasm // inferred from direct assay /// 0005737 // cytoplasm // inferred from electronic annotation /// 0030529 // ribonucleoprotein complex // inferred from electronic annotation	0000166 // nucleotide binding // inferred from electronic annotation /// 0003676 // nucleic acid binding // inferred from electronic annotation /// 0003723 // RNA binding // inferred from electronic annotation /// 0005515 // protein binding // inferred from electronic annotation /// 0008143 // poly(A) binding // inferred from direct assay	synaptotagmin binding, cytoplasmic RNA interacting protein
1430838_x_at	1.29116	up	Mbd1	17190	0006306 // DNA methylation // traceable author statement /// 0006350 // transcription // inferred from electronic annotation /// 0006355 // regulation of transcription, DNA-dependent // inferred from electronic annotation	0000785 // chromatin // inferred from direct assay /// 0000792 // heterochromatin // inferred from direct assay /// 0005634 // nucleus // inferred from direct assay /// 0005634 // nucleus // inferred from electronic annotation /// 0005730 // nucleolus // inferred from direct assay /// 0005737 // cytoplasm // inferred from direct assay /// 0016607 // nuclear speck // inferred from electronic annot…	0003677 // DNA binding // inferred from direct assay /// 0003677 // DNA binding // inferred from electronic annotation /// 0008270 // zinc ion binding // inferred from electronic annotation /// 0046872 // metal ion binding // inferred from electronic annotation	methyl-CpG binding domain protein 1
1417207_at	1.29106	up	Dvl2	13543	0001843 // neural tube closure // inferred from mutant phenotype /// 0007242 // intracellular signaling cascade // inferred from electronic annotation /// 0007275 // multicellular organismal development // inferred from electronic annotation /// 0007379 // segment specification // inferred from mutant phenotype /// 0007507 // heart development // inferred from mutant phenotype /// 0016055 // Wnt …	0005622 // intracellular // inferred from electronic annotation /// 0005625 // soluble fraction // non-traceable author statement /// 0005737 // cytoplasm // inferred from electronic annotation /// 0005856 // cytoskeleton // non-traceable author statement	0004871 // signal transducer activity // inferred from electronic annotation /// 0005515 // protein binding // inferred from physical interaction /// 0005515 // protein binding // inferred from electronic annotation /// 0042301 // phosphate binding // inferred from electronic annotation /// 0042802 // identical protein binding // inferred from electronic annotation	dishevelled 2, dsh homolog (Drosophila)
1428471_at	1.29056	up	Sorbs1	20411	0006810 // transport // inferred from electronic annotation /// 0008286 // insulin receptor signaling pathway // inferred from direct assay /// 0008286 // insulin receptor signaling pathway // inferred by curator /// 0015758 // glucose transport // inferred from direct assay /// 0032869 // cellular response to insulin stimulus // inferred by curator /// 0032869 // cellular response to insulin sti…	0001725 // stress fiber // inferred from direct assay /// 0005634 // nucleus // inferred from sequence or structural similarity /// 0005737 // cytoplasm // inferred from electronic annotation /// 0005829 // cytosol // inferred from direct assay /// 0005856 // cytoskeleton // inferred from electronic annotation /// 0005886 // plasma membrane // inferred from electronic annotation /// 0005913 // ce…	0005070 // SH3/SH2 adaptor activity // inferred from physical interaction /// 0005158 // insulin receptor binding // inferred from direct assay /// 0005158 // insulin receptor binding // inferred from physical interaction /// 0005515 // protein binding // inferred from physical interaction /// 0019901 // protein kinase binding // inferred from direct assay	sorbin and SH3 domain containing 1
1451372_a_at	1.28976	up	Art1	11870	0006471 // protein amino acid ADP-ribosylation // inferred from direct assay /// 0006471 // protein amino acid ADP-ribosylation // inferred from electronic annotation	0009986 // cell surface // inferred from direct assay /// 0016020 // membrane // inferred from electronic annotation /// 0016529 // sarcoplasmic reticulum // inferred from electronic annotation /// 0031225 // anchored to membrane // inferred from direct assay /// 0031225 // anchored to membrane // inferred from electronic annotation /// 0033017 // sarcoplasmic reticulum membrane // inferred from …	0003950 // NAD+ ADP-ribosyltransferase activity // inferred from direct assay /// 0003956 // NAD(P)+-protein-arginine ADP-ribosyltransferase activity // inferred from electronic annotation /// 0016740 // transferase activity // inferred from electronic annotation /// 0016757 // transferase activity, transferring glycosyl groups // inferred from electronic annotation	ADP-ribosyltransferase 1
1454832_at	1.28965	up	Phactr1	218194		0005737 // cytoplasm // inferred from electronic annotation /// 0030054 // cell junction // inferred from electronic annotation /// 0045202 // synapse // inferred from electronic annotation	0003779 // actin binding // inferred from electronic annotation /// 0004864 // phosphoprotein phosphatase inhibitor activity // inferred from electronic annotation	phosphatase and actin regulator 1
1459593_x_at	1.28942	up	Ppp1r13l	333654	0006350 // transcription // inferred from electronic annotation /// 0006355 // regulation of transcription, DNA-dependent // inferred from electronic annotation /// 0006915 // apoptosis // inferred from electronic annotation	0005634 // nucleus // inferred from electronic annotation /// 0005737 // cytoplasm // inferred from electronic annotation		protein phosphatase 1, regulatory (inhibitor) subunit 13 like
1441544_at	1.28929	up
1425826_a_at	1.28905	up	Sorbs1	20411	0006810 // transport // inferred from electronic annotation /// 0008286 // insulin receptor signaling pathway // inferred from direct assay /// 0008286 // insulin receptor signaling pathway // inferred by curator /// 0015758 // glucose transport // inferred from direct assay /// 0032869 // cellular response to insulin stimulus // inferred by curator /// 0032869 // cellular response to insulin sti…	0001725 // stress fiber // inferred from direct assay /// 0005634 // nucleus // inferred from sequence or structural similarity /// 0005737 // cytoplasm // inferred from electronic annotation /// 0005829 // cytosol // inferred from direct assay /// 0005856 // cytoskeleton // inferred from electronic annotation /// 0005886 // plasma membrane // inferred from electronic annotation /// 0005913 // ce…	0005070 // SH3/SH2 adaptor activity // inferred from physical interaction /// 0005158 // insulin receptor binding // inferred from direct assay /// 0005158 // insulin receptor binding // inferred from physical interaction /// 0005515 // protein binding // inferred from physical interaction /// 0019901 // protein kinase binding // inferred from direct assay	sorbin and SH3 domain containing 1
1425776_a_at	1.28901	up	C87436	232196				expressed sequence C87436
1427522_at	1.28897	up	Arhgap20	244867	0007165 // signal transduction // inferred from electronic annotation	0005622 // intracellular // inferred from electronic annotation	0005096 // GTPase activator activity // inferred from electronic annotation	Rho GTPase activating protein 20
1453365_at	1.28897	up	Rabgap1l	29809	0032313 // regulation of Rab GTPase activity // inferred from electronic annotation /// 0032880 // regulation of protein localization // not recorded	0005622 // intracellular // inferred from electronic annotation /// 0005634 // nucleus // not recorded /// 0005769 // early endosome // not recorded /// 0005794 // Golgi apparatus // not recorded	0005096 // GTPase activator activity // inferred from electronic annotation /// 0005097 // Rab GTPase activator activity // not recorded /// 0005097 // Rab GTPase activator activity // inferred from electronic annotation	RAB GTPase activating protein 1-like
1419758_at	1.28868	up	Abcb1a	18671	0006810 // transport // inferred from electronic annotation /// 0015893 // drug transport // inferred from direct assay /// 0042493 // response to drug // inferred from electronic annotation /// 0046686 // response to cadmium ion // inferred from electronic annotation	0000139 // Golgi membrane // inferred from electronic annotation /// 0005886 // plasma membrane // inferred from electronic annotation /// 0016020 // membrane // inferred from electronic annotation /// 0016021 // integral to membrane // inferred from electronic annotation /// 0016324 // apical plasma membrane // inferred from electronic annotation /// 0046581 // intercellular canaliculus // infer…	0000166 // nucleotide binding // inferred from electronic annotation /// 0005524 // ATP binding // inferred from electronic annotation /// 0008559 // xenobiotic-transporting ATPase activity // inferred from electronic annotation /// 0016787 // hydrolase activity // inferred from electronic annotation /// 0016887 // ATPase activity // inferred from electronic annotation /// 0017111 // nucleoside-t…	ATP-binding cassette, sub-family B (MDR/TAP), member 1A
1448364_at	1.2882	up	Ccng2	12452	0007049 // cell cycle // inferred from electronic annotation /// 0007067 // mitosis // inferred from electronic annotation /// 0051301 // cell division // inferred from electronic annotation /// 0051726 // regulation of cell cycle // inferred from direct assay	0005634 // nucleus // inferred from electronic annotation /// 0005737 // cytoplasm // inferred from electronic annotation		cyclin G2
1429527_a_at	1.28787	up	Plscr1	22038	0009615 // response to virus // inferred from electronic annotation /// 0030099 // myeloid cell differentiation // inferred from mutant phenotype	0016020 // membrane // inferred from electronic annotation /// 0016021 // integral to membrane // inferred from electronic annotation	0005509 // calcium ion binding // inferred from electronic annotation /// 0017124 // SH3 domain binding // inferred from electronic annotation	phospholipid scramblase 1
1440331_at	1.28783	up	Kdsr	70750	0008152 // metabolic process // inferred from electronic annotation /// 0055114 // oxidation reduction // inferred from electronic annotation	0005783 // endoplasmic reticulum // inferred from electronic annotation /// 0005789 // endoplasmic reticulum membrane // inferred from electronic annotation /// 0016020 // membrane // inferred from electronic annotation /// 0016021 // integral to membrane // inferred from electronic annotation	0003824 // catalytic activity // inferred from electronic annotation /// 0005488 // binding // inferred from electronic annotation /// 0016491 // oxidoreductase activity // inferred from electronic annotation /// 0047560 // 3-dehydrosphinganine reductase activity // inferred from electronic annotation	3-ketodihydrosphingosine reductase
1449817_at	1.28769	up	Abcb11	27413	0006810 // transport // inferred from electronic annotation	0005624 // membrane fraction // inferred from direct assay /// 0016020 // membrane // inferred from electronic annotation /// 0016021 // integral to membrane // inferred from electronic annotation /// 0045177 // apical part of cell // inferred from direct assay /// 0046581 // intercellular canaliculus // inferred from direct assay	0000166 // nucleotide binding // inferred from electronic annotation /// 0005524 // ATP binding // inferred from electronic annotation /// 0016887 // ATPase activity // inferred from electronic annotation /// 0017111 // nucleoside-triphosphatase activity // inferred from electronic annotation /// 0042626 // ATPase activity, coupled to transmembrane movement of substances // inferred from electron…	ATP-binding cassette, sub-family B (MDR/TAP), member 11
1442739_at	1.28763	up	BC031441	240120	0006350 // transcription // inferred from electronic annotation /// 0006355 // regulation of transcription, DNA-dependent // inferred from electronic annotation	0005622 // intracellular // inferred from electronic annotation /// 0005634 // nucleus // inferred from electronic annotation	0003676 // nucleic acid binding // inferred from electronic annotation /// 0008270 // zinc ion binding // inferred from electronic annotation /// 0046872 // metal ion binding // inferred from electronic annotation	cDNA sequence BC031441
1417175_at	1.28754	up	Csnk1e	27373	0006468 // protein amino acid phosphorylation // inferred from electronic annotation /// 0007623 // circadian rhythm // traceable author statement /// 0016055 // Wnt receptor signaling pathway // inferred from electronic annotation	0005634 // nucleus // inferred from electronic annotation /// 0005737 // cytoplasm // inferred from electronic annotation	0000166 // nucleotide binding // inferred from electronic annotation /// 0004672 // protein kinase activity // inferred from electronic annotation /// 0004674 // protein serine/threonine kinase activity // inferred from electronic annotation /// 0005515 // protein binding // inferred from electronic annotation /// 0005524 // ATP binding // inferred from electronic annotation /// 0016301 // kinase…	casein kinase 1, epsilon
1418182_at	1.28722	up	Ptp4a3	19245	0006470 // protein amino acid dephosphorylation // inferred from electronic annotation /// 0016311 // dephosphorylation // inferred from electronic annotation	0005768 // endosome // inferred from electronic annotation /// 0005769 // early endosome // inferred from electronic annotation /// 0005886 // plasma membrane // inferred from electronic annotation /// 0016020 // membrane // inferred from electronic annotation	0004721 // phosphoprotein phosphatase activity // inferred from electronic annotation /// 0004725 // protein tyrosine phosphatase activity // inferred from electronic annotation /// 0016787 // hydrolase activity // inferred from electronic annotation /// 0016791 // phosphatase activity // inferred from electronic annotation	protein tyrosine phosphatase 4a3
1450333_a_at	1.28671	up	Gata2	14461	0001709 // cell fate determination // inferred from direct assay /// 0001892 // embryonic placenta development // inferred from mutant phenotype /// 0006350 // transcription // inferred from electronic annotation /// 0006355 // regulation of transcription, DNA-dependent // inferred from electronic annotation /// 0006909 // phagocytosis // inferred from electronic annotation /// 0010552 // positiv…	0005634 // nucleus // inferred from electronic annotation	0003677 // DNA binding // inferred from direct assay /// 0003677 // DNA binding // inferred from electronic annotation /// 0003700 // transcription factor activity // inferred from electronic annotation /// 0005515 // protein binding // inferred from physical interaction /// 0008134 // transcription factor binding // inferred from electronic annotation /// 0008270 // zinc ion binding // inferred …	GATA binding protein 2
1440818_s_at	1.28614	up	Sf3b1	81898	0000398 // nuclear mRNA splicing, via spliceosome // not recorded /// 0006397 // mRNA processing // inferred from electronic annotation /// 0008380 // RNA splicing // inferred from electronic annotation /// 0009952 // anterior/posterior pattern formation // inferred from genetic interaction	0005634 // nucleus // inferred from sequence or structural similarity /// 0005634 // nucleus // inferred from electronic annotation /// 0005681 // spliceosome // not recorded /// 0005681 // spliceosome // inferred from electronic annotation	0003682 // chromatin binding // inferred from direct assay /// 0005488 // binding // inferred from electronic annotation /// 0005515 // protein binding // inferred from physical interaction /// 0031202 // RNA splicing factor activity, transesterification mechanism // not recorded	splicing factor 3b, subunit 1
1455288_at	1.28605	up	1110036O03Rik	66180		0005634 // nucleus // inferred from electronic annotation		RIKEN cDNA 1110036O03 gene
1437482_at	1.28596	up	Srd5a2l2	243078	0006629 // lipid metabolic process // inferred from electronic annotation	0005737 // cytoplasm // inferred from electronic annotation /// 0016020 // membrane // inferred from electronic annotation /// 0016021 // integral to membrane // inferred from electronic annotation	0016627 // oxidoreductase activity, acting on the CH-CH group of donors // inferred from electronic annotation	steroid 5 alpha-reductase 2-like 2
1434359_at	1.28575	up	Fam65b	193385			0005488 // binding // inferred from electronic annotation	family with sequence similarity 65, member B
1419593_at	1.28548	up	Greb1 /// LOC100045413	100045413 /// 268527		0016020 // membrane // inferred from electronic annotation /// 0016021 // integral to membrane // inferred from electronic annotation	0009055 // electron carrier activity // inferred from electronic annotation	gene regulated by estrogen in breast cancer protein /// similar to Greb1 protein
1438530_at	1.28543	up	Tfpi	21788	0007596 // blood coagulation // inferred from electronic annotation	0005576 // extracellular region // inferred from electronic annotation	0004866 // endopeptidase inhibitor activity // inferred from electronic annotation /// 0004867 // serine-type endopeptidase inhibitor activity // inferred from electronic annotation /// 0030414 // peptidase inhibitor activity // inferred from electronic annotation	tissue factor pathway inhibitor
1430957_at	1.28536	up	Arhgap26	71302	0007165 // signal transduction // inferred from electronic annotation	0005622 // intracellular // inferred from electronic annotation /// 0005737 // cytoplasm // inferred from electronic annotation /// 0005856 // cytoskeleton // inferred from electronic annotation /// 0030054 // cell junction // inferred from electronic annotation	0005096 // GTPase activator activity // inferred from electronic annotation /// 0005515 // protein binding // inferred from electronic annotation	Rho GTPase activating protein 26
1420039_s_at	1.28534	up	Cbx7	52609	0006333 // chromatin assembly or disassembly // inferred from electronic annotation /// 0006350 // transcription // inferred from electronic annotation /// 0006355 // regulation of transcription, DNA-dependent // inferred from electronic annotation /// 0016568 // chromatin modification // inferred from electronic annotation	0000785 // chromatin // inferred from electronic annotation /// 0005634 // nucleus // inferred from electronic annotation	0003682 // chromatin binding // inferred from electronic annotation	chromobox homolog 7
1418523_at	1.28509	up	Arih2	23807	0006511 // ubiquitin-dependent protein catabolic process // inferred from physical interaction /// 0019941 // modification-dependent protein catabolic process // inferred from electronic annotation	0005634 // nucleus // inferred from electronic annotation	0003676 // nucleic acid binding // inferred from electronic annotation /// 0005515 // protein binding // inferred from electronic annotation /// 0008270 // zinc ion binding // inferred from electronic annotation /// 0046872 // metal ion binding // inferred from electronic annotation	ariadne homolog 2 (Drosophila)
1450451_at	1.28508	up	Spock2	94214	0007165 // signal transduction // inferred from electronic annotation /// 0010811 // positive regulation of cell-substrate adhesion // inferred from direct assay /// 0019800 // peptide cross-linking via chondroitin 4-sulfate glycosaminoglycan // inferred from direct assay /// 0030198 // extracellular matrix organization // inferred from direct assay	0005576 // extracellular region // inferred from electronic annotation /// 0005578 // proteinaceous extracellular matrix // inferred from electronic annotation	0005509 // calcium ion binding // inferred from sequence or structural similarity /// 0005509 // calcium ion binding // inferred from electronic annotation /// 0005539 // glycosaminoglycan binding // inferred from direct assay /// 0050840 // extracellular matrix binding // inferred from direct assay	sparc/osteonectin, cwcv and kazal-like domains proteoglycan 2
1416499_a_at	1.28482	up	Dctn6	22428	0007005 // mitochondrion organization // non-traceable author statement /// 0008610 // lipid biosynthetic process // non-traceable author statement	0005737 // cytoplasm // inferred from electronic annotation /// 0005739 // mitochondrion // non-traceable author statement /// 0005856 // cytoskeleton // inferred from electronic annotation /// 0005869 // dynactin complex // inferred from direct assay	0003824 // catalytic activity // non-traceable author statement /// 0016740 // transferase activity // inferred from electronic annotation /// 0045502 // dynein binding // inferred from direct assay	dynactin 6
1429166_s_at	1.28472	up	Clmn	94040		0005737 // cytoplasm // inferred from direct assay /// 0005737 // cytoplasm // inferred from electronic annotation /// 0016020 // membrane // inferred from sequence or structural similarity /// 0016020 // membrane // inferred from electronic annotation /// 0016021 // integral to membrane // inferred from electronic annotation	0003779 // actin binding // inferred from electronic annotation	calmin
1429123_at	1.28469	up	Rab27a	11891	0006605 // protein targeting // inferred from mutant phenotype /// 0007264 // small GTPase mediated signal transduction // inferred from electronic annotation /// 0007596 // blood coagulation // inferred from mutant phenotype /// 0015031 // protein transport // inferred from electronic annotation /// 0016192 // vesicle-mediated transport // inferred from mutant phenotype /// 0030318 // melanocyte…	0001750 // photoreceptor outer segment // inferred from direct assay /// 0005622 // intracellular // inferred from sequence or structural similarity /// 0005794 // Golgi apparatus // inferred from direct assay /// 0016020 // membrane // inferred from electronic annotation /// 0030141 // secretory granule // inferred from mutant phenotype /// 0042470 // melanosome // inferred from direct assay ///…	0000166 // nucleotide binding // inferred from electronic annotation /// 0003924 // GTPase activity // inferred from sequence or structural similarity /// 0005515 // protein binding // inferred from physical interaction /// 0005525 // GTP binding // inferred from electronic annotation /// 0031489 // myosin V binding // inferred from physical interaction	RAB27A, member RAS oncogene family
1428369_s_at	1.28467	up	Arhgap21	71435	0007165 // signal transduction // inferred from electronic annotation	0000139 // Golgi membrane // inferred from electronic annotation /// 0005622 // intracellular // inferred from electronic annotation /// 0005737 // cytoplasm // inferred from electronic annotation /// 0005794 // Golgi apparatus // inferred from electronic annotation /// 0005856 // cytoskeleton // inferred from electronic annotation /// 0016020 // membrane // inferred from electronic annotation //…	0005096 // GTPase activator activity // inferred from electronic annotation /// 0005515 // protein binding // inferred from electronic annotation	Rho GTPase activating protein 21
1442172_at	1.28465	up
1447898_s_at	1.28452	up	Sfrs6	67996			0000166 // nucleotide binding // inferred from electronic annotation /// 0003676 // nucleic acid binding // inferred from electronic annotation /// 0005515 // protein binding // inferred from electronic annotation	splicing factor, arginine/serine-rich 6
1440972_at	1.28447	up	Nsd1	18193	0000122 // negative regulation of transcription from RNA polymerase II promoter // inferred from direct assay /// 0001702 // gastrulation with mouth forming second // inferred from mutant phenotype /// 0006350 // transcription // inferred from electronic annotation /// 0006355 // regulation of transcription, DNA-dependent // traceable author statement /// 0006355 // regulation of transcription, D…	0005634 // nucleus // inferred by curator /// 0005634 // nucleus // inferred from direct assay /// 0005634 // nucleus // inferred from electronic annotation /// 0035097 // histone methyltransferase complex // inferred by curator	0003682 // chromatin binding // inferred from direct assay /// 0003712 // transcription cofactor activity // inferred from direct assay /// 0003712 // transcription cofactor activity // inferred from sequence or structural similarity /// 0003714 // transcription corepressor activity // inferred from direct assay /// 0004872 // receptor activity // inferred from electronic annotation /// 0005515 /…	nuclear receptor-binding SET-domain protein 1
1427196_at	1.28427	up	Wnk4	69847	0006468 // protein amino acid phosphorylation // inferred from electronic annotation /// 0006468 // protein amino acid phosphorylation // inferred from sequence or structural similarity /// 0006811 // ion transport // inferred from direct assay /// 0006821 // chloride transport // inferred from direct assay /// 0007243 // protein kinase cascade // inferred from sequence or structural similarity /…	0005737 // cytoplasm // inferred from direct assay /// 0005923 // tight junction // inferred from direct assay /// 0005923 // tight junction // inferred from electronic annotation /// 0030054 // cell junction // inferred from electronic annotation	0000166 // nucleotide binding // inferred from electronic annotation /// 0004672 // protein kinase activity // inferred from electronic annotation /// 0004674 // protein serine/threonine kinase activity // inferred from electronic annotation /// 0004674 // protein serine/threonine kinase activity // inferred from sequence or structural similarity /// 0005515 // protein binding // inferred from ph…	WNK lysine deficient protein kinase 4
1417126_a_at	1.28412	up	Rpl22l1	68028	0006412 // translation // inferred from electronic annotation	0005622 // intracellular // inferred from electronic annotation /// 0005840 // ribosome // inferred from electronic annotation /// 0030529 // ribonucleoprotein complex // inferred from electronic annotation	0003735 // structural constituent of ribosome // inferred from electronic annotation	ribosomal protein L22 like 1
1439538_at	1.2839	up	Ccdc127	67433				coiled-coil domain containing 127
1433767_at	1.28385	up	1110018G07Rik	68497	0006464 // protein modification process // inferred from electronic annotation /// 0019941 // modification-dependent protein catabolic process // inferred from electronic annotation	0005622 // intracellular // inferred from electronic annotation /// 0016020 // membrane // inferred from electronic annotation /// 0016021 // integral to membrane // inferred from electronic annotation	0016881 // acid-amino acid ligase activity // inferred from electronic annotation	RIKEN cDNA 1110018G07 gene
1428650_at	1.28361	up	Tns1	21961	0007044 // cell-substrate junction assembly // inferred from mutant phenotype /// 0016477 // cell migration // inferred from mutant phenotype	0005925 // focal adhesion // inferred from direct assay /// 0030055 // cell-substrate junction // inferred from direct assay	0003779 // actin binding // traceable author statement /// 0005515 // protein binding // inferred from electronic annotation	tensin 1
1441993_at	1.28346	up	Ap3s2	11778	0006810 // transport // inferred from electronic annotation /// 0006886 // intracellular protein transport // traceable author statement /// 0006886 // intracellular protein transport // inferred from electronic annotation /// 0015031 // protein transport // inferred from electronic annotation /// 0016192 // vesicle-mediated transport // traceable author statement /// 0016192 // vesicle-mediated …	0005794 // Golgi apparatus // inferred from electronic annotation /// 0005802 // trans-Golgi network // traceable author statement /// 0016020 // membrane // inferred from electronic annotation /// 0030117 // membrane coat // inferred from electronic annotation /// 0030659 // cytoplasmic vesicle membrane // inferred from electronic annotation /// 0031410 // cytoplasmic vesicle // inferred from el…	0005515 // protein binding // inferred from electronic annotation /// 0008565 // protein transporter activity // inferred from electronic annotation	adaptor-related protein complex 3, sigma 2 subunit
1443511_at	1.28325	up
1433943_at	1.28305	up	Itprip	414801		0005886 // plasma membrane // inferred from electronic annotation /// 0016020 // membrane // inferred from electronic annotation		inositol 1,4,5-triphosphate receptor interacting protein
1435645_at	1.28235	up	LOC676546 /// Mmd	67468 /// 676546	0019835 // cytolysis // inferred from electronic annotation	0005764 // lysosome // inferred from electronic annotation /// 0005765 // lysosomal membrane // inferred from electronic annotation /// 0005768 // endosome // inferred from electronic annotation /// 0016020 // membrane // inferred from electronic annotation /// 0016021 // integral to membrane // inferred from electronic annotation /// 0031902 // late endosome membrane // inferred from electronic …	0004872 // receptor activity // inferred from electronic annotation	similar to monocyte to macrophage differentiation-associated /// monocyte to macrophage differentiation-associated
1426472_at	1.28224	up	Zfp52	22710	0006350 // transcription // inferred from electronic annotation /// 0006355 // regulation of transcription, DNA-dependent // inferred from electronic annotation	0005622 // intracellular // inferred from electronic annotation /// 0005634 // nucleus // inferred from electronic annotation	0003676 // nucleic acid binding // inferred from electronic annotation /// 0008270 // zinc ion binding // inferred from electronic annotation /// 0046872 // metal ion binding // inferred from electronic annotation	zinc finger protein 52
1458575_at	1.28222	up
1452831_s_at	1.28153	up	Ppat	231327	0008152 // metabolic process // inferred from electronic annotation /// 0009113 // purine base biosynthetic process // inferred from electronic annotation /// 0009116 // nucleoside metabolic process // inferred from electronic annotation		0004044 // amidophosphoribosyltransferase activity // inferred from electronic annotation /// 0016740 // transferase activity // inferred from electronic annotation	phosphoribosyl pyrophosphate amidotransferase
1439530_a_at	1.28151	up	Ppp1r13l	333654	0006350 // transcription // inferred from electronic annotation /// 0006355 // regulation of transcription, DNA-dependent // inferred from electronic annotation /// 0006915 // apoptosis // inferred from electronic annotation	0005634 // nucleus // inferred from electronic annotation /// 0005737 // cytoplasm // inferred from electronic annotation		protein phosphatase 1, regulatory (inhibitor) subunit 13 like
1451793_at	1.28148	up	Klhl24	75785		0005737 // cytoplasm // inferred from electronic annotation /// 0042995 // cell projection // inferred from electronic annotation /// 0043204 // perikaryon // inferred from electronic annotation	0005515 // protein binding // inferred from electronic annotation	kelch-like 24 (Drosophila)
1430527_a_at	1.28135	up	Rnf167	70510	0019941 // modification-dependent protein catabolic process // inferred from electronic annotation	0012505 // endomembrane system // inferred from electronic annotation /// 0016020 // membrane // inferred from electronic annotation /// 0016021 // integral to membrane // inferred from electronic annotation	0005515 // protein binding // inferred from electronic annotation /// 0008270 // zinc ion binding // inferred from electronic annotation /// 0016874 // ligase activity // inferred from electronic annotation /// 0046872 // metal ion binding // inferred from electronic annotation	ring finger protein 167
1417358_s_at	1.28121	up	Sorbs1	20411	0006810 // transport // inferred from electronic annotation /// 0008286 // insulin receptor signaling pathway // inferred from direct assay /// 0008286 // insulin receptor signaling pathway // inferred by curator /// 0015758 // glucose transport // inferred from direct assay /// 0032869 // cellular response to insulin stimulus // inferred by curator /// 0032869 // cellular response to insulin sti…	0001725 // stress fiber // inferred from direct assay /// 0005634 // nucleus // inferred from sequence or structural similarity /// 0005737 // cytoplasm // inferred from electronic annotation /// 0005829 // cytosol // inferred from direct assay /// 0005856 // cytoskeleton // inferred from electronic annotation /// 0005886 // plasma membrane // inferred from electronic annotation /// 0005913 // ce…	0005070 // SH3/SH2 adaptor activity // inferred from physical interaction /// 0005158 // insulin receptor binding // inferred from direct assay /// 0005158 // insulin receptor binding // inferred from physical interaction /// 0005515 // protein binding // inferred from physical interaction /// 0019901 // protein kinase binding // inferred from direct assay	sorbin and SH3 domain containing 1
[truncated: 2,897 more rows]
